# Supplementary material for: Unraveling the Role of Ctla-4 in Intestinal Immune Homeostasis: Insights from a novel Zebrafish Model of Inflammatory Bowel Disease
Source: bioRxiv preprint, doi:10.1101/2024.07.24.604955, version 2 (2025-02-01)
Supplement: scRNA-seq analysis-2 [file 604955_file05.xlsx]

## Sheet: Sheet1
Supplemental Table 4: the average expression profile of cell types from zebrafish intestines (scRNA-seq analysis)
GeneName	0_WT	1_WT	2_WT	3_WT	4_WT	5_WT	6_WT	7_WT	8_WT	0_KO	1_KO	2_KO	3_KO	4_KO	5_KO	6_KO	7_KO	8_KO
ptpn12	0.00958313910089658	0	0.00190925173751454	0.00470251866899912	0	0	0	0	0	0.0018391981684529	0.00455535414518546	0	0.00821041655548394	0	0	0	0	0
phtf2.1	0	0	0.00119325904102544	0	0	0	0	0	0.0612047543853207	0	0	0.00374184722352359	0	0	0	0	0.00454120851549256	0
CU856344.2	0	0	0.00152611433434937	0	0	0	0	0	0	0.000142576324528352	0	0	0	0	0	0	0	0
CU856344.1	0.00583488602281296	0.011249494708247	0.00846112591142466	0.00638613646407287	0	0	0	0	0	0.00248918087073599	0.0062816465608025	0.00238370792326249	0.0108862755865866	0.064032108565324	0	0	0	0
mansc1	0.0400122212339821	0.0132103497519893	0	0	0	0.00963646438121853	0	0	0	0.0119555045384309	0	0	0	0	0	0	0	0
lrp6	0.00296351813535924	0	0	0	0	0	0	0	0	0.000255641444263723	0.00651869235031453	0	0	0	0	0	0	0
dusp16	0.176049662801802	0.133887174510986	0.250389630607606	0.11055490647334	0.060806338762919	0.228254829054596	0	0.0918068084554068	0	0.144635768561356	0.125521245920467	0.27601656591693	0.0708485053947498	0.110555889066435	0.190795507355667	0.112988838798782	0.177581775426379	0.174396585148592
crebl2	0.0172584806690469	0.0553882926357847	0.0455220009501749	0.073933144966375	0.10732662457013	0.0371354339215646	0.0674036128336479	0	0	0.022663133760502	0.065937515510519	0.107513799496335	0.0851098642436399	0	0.128484418191314	0.0640995626174441	0.101601508713728	0.190401906794661
gpr19	0.000870873107489472	0.0241803866971194	0.00426793652867373	0.00333010978705946	0	0	0	0	0	0.00316156348166546	0.00661729748716845	0.000828365830539048	0	0	0	0	0	0
tbk1	0.256648460046258	0.401857257236724	0.435460432129603	0.528102403288717	0.509115918701156	0.561388483325834	0	1.1058983157306	0.493299125662028	0.180301583892189	0.35046339147043	0.390547998830604	0.390649943709523	0.362443020851136	0.180266522250123	0.193588108729927	0.532385932790878	0.350306937954041
eps8a	0.035419066356658	0.223077946671896	0.00755512675412371	0.00396380883976937	0	0.037300314711923	0.0674036128336479	0	0	0.0367352534016461	0.202516747094649	0.019631590017036	0.0180307154386221	0	0.0432994635148065	0.195769858629097	0	0
ptpro.1	0	0	0	0	0	0	0	0	0	0	0	0.000406356636870566	0	0	0	0	0	0
RERG	0	0	0	0	0	0	0	0	0	0	0	0.0100310140441316	0	0	0	0.00714963908621893	0	0
si:ch73-252i11.1	0.0655119077968487	0.120865107362768	0.0995571467160746	0.0502001498466835	0.0794923586196969	0.0665038557309381	0.0674036128336479	0	0	0.0407330945194937	0.0733569089713676	0.0614203804984375	0.0209674983389896	0.0372483529647962	0.166605886536595	0.0260192147591359	0.0618345871190203	0.0205716025484101
CABZ01085275.1	0.00283839045958326	0.0358413516308253	0.00536114914980534	0	0	0	0	0	0	0.00120482967845076	0.0173557919411057	0.000825246672419736	0	0	0	0.032100667693888	0	0
echdc3	0	0	0	0	0	0	0	0	0	0	0.00239601877520312	0.000856403267281233	0	0	0	0	0	0
FO834823.1	0.000559297942376428	0	0	0	0	0	0	0	0	0	0	0	0	0	0	0	0	0
msgn1	0.00359321911142539	0.00736232388378012	0.014659787449375	0	0	0	0	0	0	0.00582363728371183	0.00281444610339156	0.00636569102328832	0	0	0	0	0	0
si:ch211-51e12.7	0.18212700961093	0.506498986386427	0.596458359290939	0.666525283212064	0.926184669443583	1.29913058460951	0.134807225667296	1.08413261617694	0.438876139428683	0.151508043801113	0.510032638263307	0.568336007271693	0.517839787213734	0.63567775138445	0.927214717131033	0.562565098998053	0.794234959610291	0.709178442804225
mrps10	0.273055688218659	0.339814510804909	0.294609582467291	0.255598986831033	0.259111639348849	0.240604325975773	0.134807225667296	0.45208823927949	0.252363271579081	0.327581110394017	0.364896312014858	0.555514165334632	0.409855931590887	0.49936103538525	0.449534772116318	0.338088666861315	0.332417809060554	0.186141439821633
tulp4a	0.0176008780938465	0.0251948268479016	0.0287403622906482	0.0380488832145043	0.0131546060853208	0.0271909073605786	0	0	0	0.0197073699053014	0.0417778690391541	0.0215801645528018	0.0260882235677986	0	0.020370485610052	0.00685060457379021	0.0938727495650922	0
tmem181	0.0400351582106534	0.177580213226301	0.0982699337649858	0.0766207243309803	0.108561903601692	0.16244315076742	0.134807225667296	0.137150159644982	0	0.0577871564953182	0.222180608307821	0.102262745866955	0.0694040791062549	0.204189533083599	0.223270347231673	0.0908573962257039	0.216823595821541	0.0255561545144754
dynlt1	0.00424635448127472	0.00461381532199982	0.00749623972904276	0.0111490326276292	0	0	0	0.0219900077404827	0	0.00241882483066875	0.0179644474167593	0.00994052312782438	0.00265280487691649	0.0381074324736297	0	0.0410716822072168	0.00450254528885179	0
rpl18a	13.2646685836725	30.1419231114283	30.4160224686564	35.9579434530342	17.7651751794148	26.8495857510179	42.9303582377998	36.5996436432069	25.2125584166301	11.9777756758118	24.6372445214121	35.9026189372188	42.1804268292041	18.2246143400151	23.7762097726239	30.4477946557229	32.0699547201384	35.7184090731919
RF00263	9.86824365147515e-05	0	0	0	0	0	0	0	0	0	0	0	0	0	0	0	0	0
BX890562.1	0.00159134486623394	0.00364529793019984	0	0	0	0	0	0	0	0	0	0	0	0	0	0	0	0
pthlha	0.00401844842106627	0	0.00394198817374981	0.0214165003992953	0	0	0	0	0	0	0	0.000373483939985164	0.00503515799066985	0	0	0	0	0
xpot	0.104696868567677	0.285108231638593	0.105275194948107	0.180879163191968	0.088914715729686	0.0309152670920801	0	0.416253190718979	0.060084960133629	0.12437806997848	0.308091465033701	0.170620743257982	0.158563735862099	0.0835412646539808	0.261223860163184	0.155721141422508	0.0647390179958427	0.221637319437088
rtcb	0.149732611948782	0.229269526584976	0.14908168629416	0.0871166791454962	0.111888951569641	0.254013554977767	0	0.138744288997251	0.228302027245137	0.161771421686356	0.251248117257727	0.177200289286645	0.096273713579563	0.0596844302038603	0.0486553971175165	0.162511929268403	0.182514617195627	0.177710808130345
fbxo7	0.113736902088183	0.0889093694130001	0.207567283556226	0.217418439795569	0.320128122766491	0.134796980510571	0.0674036128336479	0.280446626376246	0	0.0807794005316608	0.108048532789417	0.179919978196415	0.107957680129671	0.151701322344032	0.153007567385263	0.124110585518926	0.228962793686537	0.063263008830048
CU855889.2	0.00640368435391003	0.0470876355818345	0	0.00682088954776093	0	0	0	0	0	0.0219754740483831	0.0262764694692876	0.00773850185355145	0	0	0	0.0220964217277941	0.0217788057374086	0
ost4	0.605516179785883	1.30804320051726	0.956956158185552	0.36230086906267	0.819196712006508	1.31055082168029	0.322865523739698	0.716065141094875	1.07345304639567	0.78091529884815	2.07371002977227	1.38762928037161	0.524528806270607	0.823460613926641	1.56689202129766	1.02399853511398	1.11166770428582	1.56239015265696
agbl5	0.0104830806361731	0.0230391204295168	0.0397099799408478	0.0171882719660586	0.0041581338295373	0.0332464722358145	0	0	0.0749788184837783	0.0118735498590306	0.0502725195715589	0.0153708291111008	0.0148782173971216	0.047701879334296	0.0061122826319489	0.0457817692940636	0.0967560810408624	0
tmem214	0.137881424902278	0.398129080015738	0.223655377019435	0.161593531339864	0.281544773816371	0.163382386300772	0	0.39041189104328	0.320889570623183	0.190223294565305	0.342895641755923	0.299758155101959	0.159385782500941	0.325271433682219	0.205730465790364	0.198161934132245	0.200943849614489	0.306369556095357
mapre3b	0.0944417753137825	0.037161858273804	0.0140954761317213	0.0407316148389566	0.0219510949341243	0.0934657876281491	0	0.151328040477387	0.0630859103927729	0.0746515628212353	0.046852891279751	0.019736971507867	0.0486348118279939	0.0201986333604668	0.0361052850091175	0.0772206788642548	0	0.235140264583884
dpysl5b	0	0.00266400266400266	0.00343590187613986	0	0	0	0	0	0.0624574508616005	0.000492423376952853	0.00586849618824456	0.00119211160785771	0	0	0	0	0	0
sobpb	0	0	0	0	0	0	0	0	0	0.00020637653309146	0	0.00228768433579926	0	0.0115154174166082	0	0.0420997214871185	0	0
si:ch211-152c2.3	0.0177218814029111	0.0682350767363985	0.0413619575640354	0.0251891439037604	0.0254504733788048	5.58361237008124	0	0	0	0.0248353684159722	0.110146253346981	0.0233574988079187	0.0245542917404531	0.0256595136495783	5.23189704093558	0.0132791543834489	0	0.0294151387953324
crybg1b	0.0935180946286466	0.0288765968461358	0.00540375351811528	0.00527983383306961	0	0.0139063684214186	0.29218407596786	0	0	0.0923364981041776	0.0106142250374532	0.00581958027776905	0.00826439114980719	0.0254370724982003	0.0149214127666181	0.0548568832469069	0	0
ripply2	0	0	0	0	0	0	0	0	0	0.000320734016473614	0	0.062519922729973	0	0	0	0	0	0
sim1b	0	0	0.00319564471972438	0	0	0	0	0	0	0.00146388021946492	0	0	0	0	0	0	0	0
atp23	0.0580694348597046	0.0120064652867866	0.035876538275671	0.0126698664413261	0.0496526592063912	0.0435511169225428	0	0.0552095755487832	0	0.0690176615824595	0.0546463291138753	0.0790388323163986	0.0206732551933008	0.0644316750017754	0.00603509407202885	0.0619047504634439	0.0304526624687294	0.0193866828997825
rpap3	0.102562793101162	0.130070911721411	0.129042742306558	0.104248974900907	0.0820093165337109	0.130480171284183	0	0.0219900077404827	0	0.0780811756365117	0.137528905648729	0.163502994366127	0.125038727334698	0.0415594778467203	0.050098242699692	0.181902172317751	0.107831315562871	0.0486307683440357
naga	0.320393024800501	0.57022040658755	5.41979480234679	0.147584427815096	0.876328818399512	1.88662856860514	0.25546191090605	0.224042726426059	0.731792730654927	0.564964227375011	1.14910723294695	6.32397313558058	0.279206487922884	1.3088738416343	3.64421554980153	0.507299413782808	0.421012485476148	0.442538894903302
FQ378018.1	0	0.0112699295656386	0	0	0	0.0234093356430544	0	0	0	0	0.000484198285783125	0.00101230333223937	0	0	0	0.0238681713161864	0	0
mtpn	0.371796777779834	0.626537886178406	0.955194893862828	0.556999176629414	1.56367072701414	2.61471042358297	0.510923821812101	1.48312324089637	0.70727121948192	0.395505739553825	0.607072018201236	0.87046060646432	0.588138210475738	2.44878734121725	1.58235113450342	0.960237254410448	0.91289207491517	0.325535228758659
si:ch211-117i20.2	0	0	0	0	0	0	0	0	0	0.000153487041396069	0	0	0	0	0	0.0175669740887132	0	0
ptn	0.00193454856833552	0	0.0903757787953327	0.0523083241566755	0	0	0	0	0	0.00107214286612482	0	0.0420745050619869	0.126054233572193	0.0414372081266653	0	0.0261191586877969	0.271815184052362	0.0766969928192729
CABZ01068469.1	0.0105604544935401	0.0247351760117794	0.0106421421326541	0.0167812336924009	0	0	0	0.0611845325501713	0	0.00485953731709951	0.00829852583101594	0.0147041563116786	0.00635784722203913	0	0.00693397125868913	0.0108100337705838	0.0132698503691672	0
trim35-14	0.0829809771250257	0.0996639758066443	0.147342433419159	0.193779498152211	0.4929989765658	0.0357910775822859	0.366501740883269	0.125464217605139	0	0.0197006226878782	0.031003316213503	0.00987952046270135	0.0464446320627313	0.0477036648340509	0	0.0277545748318327	0.0358716258950086	0
zmp:0000000711	0.00401298067857907	0.0278411914591088	0.019502135158044	0.171109059140003	0.0256864709357581	0.233594783577361	0	0.0535630115267601	0	0.00499081714004305	0.0147839445742245	0.0243800878764861	0.124203594121507	0.00739693663266295	0.131529254219383	0.046211132581878	0.0692439620117284	0.0677014894172949
slc38a4	0.0138617183618925	0.00745595395202839	0.00217583676698507	0	0	0.00895599917604808	0.29218407596786	0	0	0.0013180703459811	0.0204361097499924	0.00333000996454064	0.00653823395762571	0	0.00605455150909696	0.111115665548792	0	0
AL929171.1	0	0.00148385565052232	0	0	0	0	0	0	0	0	0	0	0	0	0	0	0	0
slc38a2	0.642476491953969	3.37665312490084	0.988035214051564	1.87004010328087	1.62223686591253	2.96047968154075	2.46430404748749	2.28272218899184	2.56542816858789	0.362223691515032	2.8177816691477	0.670219151959108	1.77259668681729	1.35928230012645	2.96651700907924	1.22106448335855	1.52352004297605	1.82061435114589
scaf11	0.115140571673244	0.150591901009119	0.116267714986456	0.173134532876005	0.152791766414997	0.273224940790897	0.480242374040262	0.159610754083829	0	0.116771997355547	0.154981231608718	0.149953227965496	0.180338981194293	0.166774598505397	0.244533741583625	0.128538716452868	0.176084022923851	0.0215513471729651
arid2	0.0403605403893015	0.273397002858242	0.171757353031043	0.219634182887106	0.253201370406902	0.201075995182138	0	0.369426093313107	0	0.0527968978265298	0.132124135444127	0.187534398067757	0.16194736309634	0.258784858329394	0.0587595741515135	0.119759125382146	0.253880427676513	0.107402416679635
CR847994.1	0.00797397524621767	0.0149438758714059	0.0339102021054126	0.0297473996707516	0.0585134212881677	0	0	0.0692712662787476	0	0.0140437779700724	0.0309932424414797	0.00579150333895346	0.0455542522892103	0.0292513126526553	0	0	0.0259106060366481	0.0631561432157721
gas2l3	0.0103996923533085	0.00875120329045244	0	0	0	0	0	0	0	0.000164544351679458	0.00141476373869993	0.000306358789154874	0	0	0	0.00801328281759845	0	0
fgfr1op2	0.081229863518153	0.13608445971766	0.24269999870159	0.273536357033193	0.377365421439146	0.357777949330503	0.134807225667296	0.338258990869523	0.329232188021725	0.0713562390035664	0.181928107589964	0.343786321013156	0.385218595055203	0.288828620017144	0.120496108125627	0.185114853121362	0.5278319970027	0.370295243570366
tm7sf3	0.0355732958922586	0.038939606553157	0.0542548474777167	0.186177305246485	0.131415176895056	0.0170099399682595	0	0.232226968709285	0	0.0374221151726197	0.0340612673395223	0.0878433583262525	0.161703576691432	0.109179673567359	0.00622732863170022	0.0216406611033289	0.129156583116904	0.0252896621318513
med21	0.0439102557311789	0.206812969815345	0.197970787380715	0.381084286238358	0.290670452830857	0.31243974451617	0.378059095902924	0.358328741958932	0.781423035934979	0.0702007819362223	0.271952898312599	0.258569228301189	0.374563141521071	0.535179587361135	0.672946295338466	0.324769323291132	0.282708550711318	0.457500968899383
pmpcb	0.139250621266534	0.201092379681839	0.122749895710687	0.121941075198833	0.0353952291239246	0.139779405495222	0	0.30099922151222	0	0.164290374275654	0.25902772525512	0.191372332150119	0.219153755652607	0.144564066970988	0.203312941168833	0.372606219282098	0.173615467633575	0.194083782416225
dnajc2	0.0582908780835891	0.108900244389791	0.0799049411018902	0.0591792502715938	0.00399147421108512	0.0412670320818367	0	0.152831367997725	0.060084960133629	0.0441812583581743	0.0501640209943649	0.0651361252567104	0.0815851020494126	0.0460278993665626	0.0130119384535311	0.0346849715490724	0.0367692269205501	0.0860897792481808
nudt4b	0.00791225838819423	0	0.0167464916100077	0	0	0	0	0	0	0.00992713147892194	0.00473130896393796	0.00440298067543523	0	0	0	0.0127817742125149	0	0
ube2nb	0.112883220301705	0.137697258155484	0.158931812908619	0.120845188173069	0.14844507100066	0.159236133016166	0.202210838500944	0	0	0.135739998920621	0.163695491387863	0.188393834183564	0.169148903995462	0.234351545346433	0.0707099856574244	0.148983388146325	0.372320312966586	0.0724719126793004
mrpl42	0.0896363990303513	0.0916572978861125	0.0875971384279613	0.056374913641843	0.0760686575606313	0.135916240057253	0.25546191090605	0.30638579331386	0	0.126865549335979	0.131034047215795	0.162057210783931	0.117642154799157	0.138451394298739	0.175701937362965	0.0919273483687709	0.136535420833284	0.0285991835272264
pwp1	0.235914686088989	0.439374251923374	0.171464078111093	0.153020852819617	0.106848327509818	0.149735857700295	0	0.277635687169417	0.0570528766060385	0.173430728261888	0.370768303385705	0.255126203601034	0.205769424039725	0.115889045258895	0.133034481585347	0.14515327093463	0.347195565824545	0.0637279631116403
CU571163.1	0.000276503878326349	0	0	0	0	0	0	0	0	0.000581669610571323	0	0.00185132045431404	0	0	0	0	0	0
ano6	0.0132633326984929	0.0290621737924384	0.264469271760823	0.613553375779816	0.163507117751059	0	0.433905353716917	0.481731339678187	0	0.00217849101823465	0.0424290160348458	0.290034720722063	0.897095798921028	0.316637363412162	0.0156963530854559	0.0995369200371062	1.26338925786664	0.0684461997525966
si:ch73-177h5.2	0	0	0	0.0027810594279027	0	0	0	0	0	0	0	0.00413975823811889	0	0	0	0.0174928894145611	0.0137316613662454	0
CU467633.3	0	0	0	0	0	0	0	0.0744180508424123	0	0	0	0	0	0	0	0.00774206122751907	0	0
CU467633.2	0	0	0	0	0	0	0	0	0	0	0	0	0	0	0	0.00134388660607351	0	0
CU467633.1	0	0	0.00500202081640983	0	0.0261263732674949	0	0	0.0219900077404827	0	0	0	0.00390735570287654	0	0	0	0.00358659273183948	0.0226378532071047	0
FAR2	0.00576968226294162	0.0535625437127126	0.0139801109819565	0.015742205130806	0.0611612679205899	0	0	0	0	0.00537596361440017	0.0350741362160133	0.00326581013880849	0.0436414804378837	0.076901864960045	0	0.0160059675054787	0.150038058043089	0
cpsf6	0.180697386568378	0.460955894933581	0.416828879237112	0.402360377303726	0.359129874645693	0.474490199205023	0.376116596144805	0.772451704854702	0.117893440637719	0.202016502999093	0.502064983290413	0.517531331396083	0.417055667048361	0.35174811083892	0.289344637744717	0.216032210135039	0.426442323565347	0.142850437133793
yeats4	0.0436757258447584	0.130846842314418	0.154490601908559	0.0952574936184818	0.124838317788874	0.16439034377837	0.359587688801508	0.0879229091932194	0.060084960133629	0.0472743290257845	0.167059874772683	0.160015669463072	0.122107526612427	0.0802547447873979	0.276695095688475	0.0921166578251444	0.163810992723306	0.128063224530412
frs2a	0.000252759182425149	0.0116327245540154	0	0.00534499825753057	0	0	0	0	0	0.00126551095783065	0.0128421084899548	0.00287040247635362	0	0	0	0.0240373508031865	0	0
si:ch73-278m9.1	0.00469758129633513	0.00574801032327078	0.00243573199348588	0.0153443392132279	0	0.00930934006088308	0	0.068927488282327	0	0.00279657867012254	0.0196738829696944	0.00463030859654451	0.00261818829224741	0	0	0.00485696246664436	0	0
cmah	0.143189121096225	0.695682020572917	0.0203390318081347	0.17084429018051	0.0313937243944935	0.238981208949423	1.28066864383931	1.56986173128706	0.060084960133629	0.231674890105711	1.0793875505541	0.0681869342113808	0.222115168304807	0.0439677250654804	0.390940715580613	0.751861968429684	0.800135637440038	0.0509526330225534
glipr1a	0.000171957654670924	0.00627533667181244	0.0879575043596164	0.00293907416812445	1.21860333707904	0.0815820226056175	0	0	0.173979609589756	0.00296320232094879	0.00851659738185555	0.115415929861358	0.0218090017106943	1.62388884781981	0.027533586118266	0.00946614716451028	0.0229543159236127	0.104100417941147
krr1	0.0386933384254075	0.097794480388378	0.0839260169114293	0.137087901245763	0.0518637487685587	0.0165978999190853	0	0.0414593698175788	0.117893440637719	0.0527086036990914	0.0949995459680289	0.121313294549753	0.189659715386168	0.0610447744367812	0.0141236899609449	0.113353504676826	0.199016437242007	0.066107795236025
si:ch73-89b15.3	0	0	0	0.00519151768308796	0	0	0	0	0	0	0.0038684779396177	0	0	0	0	0	0	0
phlda1	0.00633644071872049	0.18392551697457	0	0.00752808388544719	0	0.0254487472329773	0	0	0	0.0287995133760332	0.181526309879462	0.0120609582375025	0.0850376906661979	0.0275680310085213	0.0123795778844865	0.0107656069003234	0	0.0482346131584025
nap1l1	0.77185494267995	1.17383488127168	0.946497874666384	1.20853277088212	0.51885595013082	0.336145055759535	1.51354175491323	0.552177761155755	0.31610816578737	0.475303532184332	0.754966790403524	0.784477694853917	0.914982678125363	0.397005988216315	0.459962389236387	1.22033796961173	0.727957011034668	0.301730205952378
OSBPL8	0.000378259270539887	0.0110626161586038	0.0699273726642425	0.066693878145278	0.0985457993448376	0	0	0.0647645346542151	0.182939866137785	0.00356311632336654	0.0239302955118003	0.0325073387989927	0.0681218149795841	0.0613682899266568	0.051590333117295	0.00120158570862796	0.0385659544422234	0.0975121304782679
zdhhc17	0.00541179073310369	0.0166444707298156	0.0208848278695442	0.012183941512289	0.0270912836976717	0.00684643112661447	0	0.0414593698175788	0	0.0110285758419338	0.0355132623766308	0.0213478897885066	0.0105080317525197	0	0.0221822042711272	0.00173421792321161	0.0110285075892675	0
csrp2	0.00240034547531782	0.0864210226370384	0.110903505024524	0.00481936413664463	0.0179018976011457	0.0255181424317917	0.0674036128336479	0	0	0.00506134982305561	0.138790413925394	0.0209237152827806	0	0	0	0.130628322549712	0.0681349787571888	0.0283615530786466
e2f7	0.0229356781733233	0.0289631276146321	0.060204695073792	0.00395538953467215	0	0	0.29218407596786	0	0	0.0210259135910102	0.047339123383512	0.0766140728059638	0.00829820999080875	0	0	0.00306760510842143	0.0112784838108643	0.0210262933798715
cog5	0.0269642423860861	0.0265296640182132	0.0284056986456506	0.0251471829122604	0.0438796058424211	0.101220215609415	0	0	0	0.0298252941709089	0.0862015534689275	0.0186206561055211	0.0498926812805585	0	0.0190761571511432	0.0291326066960436	0.0433814724345451	0.0368837645045404
RF00001.3	0	0	0	0.00299244318322939	0	0	0	0	0	0	0	0	0	0	0	0	0	0
gpr22a	0	0.0174913061189154	0	0	0	0	0	0	0	0.000586747843742547	0.0615046963937371	0	0	0	0	0.0340508370355719	0	0
dus4l	0.015029831145098	0.0411253854964057	0.0152480769132079	0.0418399761745621	0	0.0452767699177179	0	0.137854976564654	0.080907458049483	0.0182927935922274	0.0400404933945479	0.0288051867279903	0.0750912918657589	0.0779896983868695	0.0623237465178025	0.0543630213799125	0.115428127646395	0.0367942100262589
bcap29	0.120426752651313	0.121614882526799	0.121061824440719	0.0833709893332519	0.0237025800258358	0.236403613003434	0.134807225667296	0.083903879715398	0.310043343186016	0.0612159870169169	0.180181904514662	0.0584499601013488	0.0766592568782438	0.141894875508718	0.191448435626911	0.0775537725289229	0.120903234949536	0.114150347361049
slco1c1	0	0	0	0	0	0	0	0	0	0	0	0	0.0119710388129789	0	0.0821721812300404	0	0.0152307148688331	0
pde3a	0.00993139657998884	0.0480284902224995	0.00337706469400418	0	0	0.345684692348917	0	0	0	0.0376159994465581	0.0254484924941277	0.0030051559738126	0	0	0.0625636887340825	0.0485682211537633	0	0
aebp2	0.235174159031877	0.501108325614154	0.292198456112241	0.548460368698466	0.318418232839501	0.485806017110096	0.621310966138552	0.314373482148593	1.13012354567098	0.179605882003148	0.304106339078452	0.244942835332789	0.498741264787957	0.244513360157925	0.368238587179771	0.205633766004371	0.570414444871512	0.242457313455033
plekha5	0.0356182121035413	0.0924641066501791	0.0121498958469573	0.00333010978705946	0.0189118142103372	0.0523690552449994	0.29218407596786	0	0.114105753212077	0.0434538176039031	0.0751204271792881	0.0111814624031652	0.0186814920794907	0.0312087459389619	0.0478463244565547	0.0968944323375873	0	0
CABZ01085700.1	0	0	0	0	0	0	0	0	0	0	0	0.00119819341190127	0	0	0	0	0	0
fgd4b	0.0209822855306109	0.00890398143892412	0.582481228420922	1.64618565363304	0.104260082145175	0.0136928622532289	0	0.360177898043889	0	0.0100583076321536	0.0199183354323712	0.439723212777616	0.82528782921373	0.105947409367922	0	0.0522399441378372	0.129168902261669	0.0631311422660036
pik3cg	0.0735926075384097	0.243515858767497	0.491870163945422	0.990775142119268	0.803136810135236	0.126007843244298	0	1.27181370471748	0.211504061866193	0.0734112491732193	0.588917955273199	0.393958522762756	0.790312242696787	0.816987862275157	0.150431845364631	0.124883213807002	0.800867504304934	0.432966180196651
nampta	0.152773101594394	0.200261518461602	0.187905796718563	0.597195516125235	0.547733850013165	0.0442467692049134	0	0.062204916211351	0.334582660058995	0.055870026665832	0.0914288439088556	0.143324881867989	0.400025613321359	0.631838996053734	0.0560227555421081	0.0977555764427679	0.201494112587214	0.223759091928729
sypl1	0.00229454856077637	0.00104588944530207	0.00283700408081281	0.0214214124040754	0	0	0	0	0	0.000989585590630026	0.00610734503903809	0.00169151599075799	0.0084141235463899	0	0	0	0	0
CU928083.1	0.00193970781242911	0	0	0.00468006381735021	0	0	0	0	0	0.000298325582039177	0.00095595348712713	0	0	0	0	0	0	0
atxn7l1	0.00378482863868081	0.0135908941537418	0.00549956181863353	0.0135468439734025	0	0	0	0	0	0.00567666586347903	0.00922602268040155	0.00683712370735494	0.0210469955354429	0	0	0	0.0444413380342278	0
CU928073.1	0	0	0.00358920635606819	0.0188081036275597	0.0258758991874968	0	0	0	0	0.00322663872285605	0.0057738655667984	0.00578221433324136	0.0284620202701174	0	0	0	0	0.0194196627969752
znf800b	0.0123520804771356	0.0331773751335378	0.0745534300683904	0.204202747871956	0.215575598698152	0.0152244823081291	0.188058298072402	0.0627321088025695	0.0527339939144971	0.0254274565896321	0.0431630897949655	0.167264709016488	0.179812499042966	0.301988955952504	0.124280007690194	0.064212239099314	0.157923938878602	0.12442976266202
si:dkey-61f9.1	0.00672435744272771	1.64621219231575	0.00938238009309343	0.017327942726701	0.0593426883271945	0.0416457230060731	0	0	0.0661222600588488	0.123635802946815	3.06827987502995	0.0594140076592473	0.0878045554789946	0.0135832838675412	0.209641609147228	0.0710962712323154	0.0825890372037604	0.0468329235452523
si:dkey-61f9.1.1	0.0121232606700716	0.918367893685463	0.00659454227827189	0.0252206052795793	0.024016234974843	0	0	0	0	0.0578843297625691	2.26776555638267	0.03663940686374	0.0833826596193749	0.135945763070526	0.161146781219794	0.108886250156288	0.0132073876843751	0.0835419770047845
gpr37b	0	0.00892172082151205	0	0	0	0	0	0	0	0	0.022852320351817	0	0	0	0	0.00671133732792131	0	0
waslb	0.337868189416023	0.59302452411581	0.25027472459075	0.328240333011726	0.329335264989603	0.853546400189386	0.794690813575233	0	0.183683555110159	0.494908391506819	0.767737488248463	0.213808132455609	0.213618200548259	0.194930039817913	1.09558961672493	0.451082953461813	0.141835387461442	0.249673257828796
CR293509.1	0.00129426566537098	0.0159425758858428	0.0291756331599715	0	0	0	0.0674036128336479	0	0	0.0179676013753529	0.0931906504981375	0.247731558575579	0.0046953426895862	0.147516698015689	0.0371494654087517	0.0697005571454144	0	0.0630788801396146
smkr1	0.00245752838015212	0.00374430865085071	0	0	0.0272985367984276	0	0	0	0	0.00195366202492836	0.0159226482373294	0.0391010559982291	0	0	0	0.0449337562567939	0	0
cd9b	0.195416853403461	2.25999122064838	0.0836981102979294	0.102669350546596	0.276920909391685	0.328189893949476	0.337018064168239	0.589984801874805	0.582699855711121	0.191565232122571	2.55399336131821	1.23322974885198	0.146172833472004	0.486620431722535	0.410496848370334	2.80547124680728	0.954336569362482	0.689524670884144
ntf3	0	0	0	0	0	0	0	0	0	0.00116347579551494	0.0121939457509416	0	0	0	0	0.0325294048497937	0	0
tbc1d30	0.025687850627371	0.193372208796238	0.00994131481882636	0	0.0291103865859339	0	0.0674036128336479	0	0	0.0140232519616573	0.185385597513509	0.00846212820924593	0.00565331072009045	0	0.00796923873846951	0.0175805250345059	0	0
gnsa	0.011315427580753	0.0728633614028101	0.0806199814545036	0	0	0.0409991645481215	0.188058298072402	0.0552095755487832	0.0962667744854541	0.0118957286244114	0.155572855019846	0.115131725734919	0.0100506449751519	0	0.10882378231525	0.155787019033968	0.0470411116399241	0
FP102892.1	0	0.000780192473483208	0.000520343018443246	0	0	0	0	0	0	0.00202357620236011	0.0073531522513282	0	0	0	0	0	0	0
zgc:194209	0.00063092228649879	0.00147007370949579	0.0019023134204173	0	0	0	0	0	0	0.00149711670707375	0.000568771807704023	0	0	0	0	0	0	0
rassf3	0.063412853248983	0.0460388563551152	0.0452240981250966	0.00383483812381312	0.00618394770853818	0.0275516937834111	0	0	0	0.0626432671866935	0.114549745705696	0.0239996840426601	0.00408060833709089	0	0.020785351521001	0.0242639189725258	0	0.0404447302538716
CABZ01020840.1	0.778850225924192	1.20566005351598	3.27112779990021	0.693479302561984	0.956213074543352	1.6425041734489	0.727287200741586	0.763292151725402	0.598306725015359	0.526914674593293	1.21878194986151	3.54767451848836	1.17029648036901	0.749246657068315	1.91750898470882	1.42095990711586	1.40096962175091	0.480694801847185
DGKI	0	0	0	0	0	0	0	0	0	0	0.00114907000019534	0	0	0	0	0	0	0
creb3l2	0.162780296814233	0.131229509981525	0.0487261281373211	0.0408717947222172	0.138271678587105	0.0757494080172243	0.378059095902924	0	0	0.0691187027066973	0.0998161165117554	0.105745073802112	0.0352360251652214	0.0230581713680445	0.144364829419029	0.264604336965489	0.0948763303537072	0.0021316843759899
ssbp1	0.0338541803068946	0.102070074248644	0.0876946771961683	0.0986856927898606	0.0352092128545334	0.135937406808104	0.188058298072402	0.271918109718357	0	0.0714769133759403	0.135847195844651	0.173282499383384	0.156446642892606	0.0206035944393776	0.0999165348713929	0.0406439112350709	0.165963684729357	0.0506336315216913
si:ch211-258f14.2	0	0	0	0	0	0	0.29218407596786	0	0	0	0	0	0	0	0	0.00974561983116688	0	0
coa6	0.281839623007285	0.250558533380007	0.286929747926656	0.2427436354045	0.230798358900946	0.415071056564549	0.390269136573346	0.912164708779617	0.365223633834276	0.414045473093805	0.397580690219957	0.462083270938803	0.368562041916597	0.671002341397884	0.361872772359303	0.369683465679721	0.888731190946148	0.339863570904025
ptprz1b	0.00175577699185364	0.00103608476002205	0.00234441247968274	0	0	0	0	0	0	0.000937456565357232	0.000379736673881917	0.00140040684619696	0	0	0	0	0	0
ndufa5	0.665914226451564	0.351380110054737	0.779687649446278	0.397478179885247	0.619273253435316	0.737949193293548	0.25546191090605	0.890861471302619	0.353984725972616	0.743188695194067	0.771047732080694	1.01790424022669	0.546624179279326	0.731616946680243	0.818138326668521	0.753165373237016	0.786229232641584	0.379626084606296
CU468917.1	0.00600816848042583	0.00166901162800401	0.000579079099772897	0	0.00816943406245532	0	0.188058298072402	0	0	0.000179286875684485	0.00124305914359711	0.00506787491300798	0.00796029405326233	0	0	0.0256793035760393	0	0.0535940146204472
CU468915.1	0.0101015457011236	0	0.00286542645419507	0.00587337237796334	0	0.0111474642305742	0	0	0	0.00152828329314308	0.0164576822653722	0.0053277794127536	0.0071708408675678	0	0	0.0131752305665349	0	0
strip2	0.0266274875361184	0.0214021800473464	0.00671646405267984	0.00426913661834858	0	0.0348620335024142	0	0	0	0.0146119834389631	0.00748997139322582	0.00442348976118452	0.00496287767499107	0	0	0.00293580363183957	0	0
ahcyl2	0.934855181845559	0.570731311309103	0.334517328271635	0.375685320536062	0.326068292863675	0.282441448056654	0.525076362240642	0.0496978371501272	0.827952953590165	0.580016155274799	0.447421647051219	0.43073674379504	0.241489508999882	0.571650206609736	0.214819164347286	0.69420196224078	0.144448298871033	0.703176958162147
tmem209	0.00918830945060102	0.0454253500161822	0.0347880350216023	0.022786897881598	0	0.0193493741066626	0	0.301826970398606	0	0.00509352218143973	0.0311917140833933	0.0242901441980532	0.0154744300464923	0.0292513126526553	0.00709710615496531	0.027616742726732	0.0163791310215828	0.0436957899106421
CR751235.1	0.000288942524968752	0	0.00248449118490105	0.00944293520554045	0	0.00799159284432777	0	0	0	0.000440418719673033	0.0221045961954107	0.00318373756305031	0.0119688147927185	0	0	0.00777433686346586	0	0
tigarb	0.0206332808427401	0.00891642221316609	0.00325535989572506	0.0224137412159473	0	0.00796841321003542	0.0674036128336479	0	0	0.0269270572476475	0.0235800114729587	0.0153098873092094	0.0326980853024973	0	0.0308586325453367	0.00421343580409209	0.0131945770425822	0.102186769359823
rad51ap1	0.00209574673566263	0.0183418591003611	0.0236962833437046	0	0	0	0	0	0	0.015226555119646	0.0313367016943303	0.0271940084429319	0.00190973996025831	0	0	0.006621403176715	0	0
galnt8b.1	0.00361918268108491	0.339954920234033	0	0.00206018076438063	0	0	0	0	0	0.0161286572827782	0.379238812948552	0.0113856461490649	0	0.0310505005340686	0	0.00865090298187523	0.0155209128780118	0
galnt8b.2	0.00210708501013403	0.0295764023083563	0	0	0	0	0	0	0	0.00142972664770277	0.0229697507711543	0.00131899505931587	0	0	0	0.00182874464726442	0	0
ada2b	0.0029081261303599	0	0.0623032682672994	0.00519586326150572	0	0	0	0	0	0.00638074651884077	0.00319918540589153	0.163599313865522	0	0	0.00606943432872056	0.0164511565163031	0	0
atp6v1e1b	0.224571303815531	0.4827074322064	2.67984478738292	0.273657927986063	1.24083453323089	1.42405210729905	0.0674036128336479	0.642463743739698	0.637689785948621	0.370538328107748	0.790900903617283	4.38129432427281	0.515490190906194	1.82493278138714	1.84640471111296	0.752925031032178	0.681204238873007	0.458445946596363
si:ch211-214j24.14	0.000788967177663613	0.00476622089902384	0	0	0	0.00749080503681731	0	0	0.0612047543853207	0.000180933940186407	0.0258643295107605	0.00422313413082177	0.00485564177017276	0	0	0.0230137973558932	0	0
ccdc167	0.0551732967856342	0.137554795164317	0.164716656731307	0.0464419232944522	0.189247396870553	0.287824510690892	0	0.267405658665938	0.119013234889411	0.0707714089195935	0.154017126965534	0.18054427450644	0.0573815192534815	0.291883536876737	0.202688784737517	0.110972408049551	0.15963094541864	0.0883768980766971
si:ch211-214j24.9	0.00444484662384522	0.00925830775240239	0.001366754863358	0	0	0	0	0	0	0.00517147102922876	0.0286291569930211	0	0	0	0	0.00159311874661064	0	0
si:ch211-214j24.15	0.950992838898429	0.612393493576315	0.0798238255063235	0.0642456895593635	0.128170745870381	0.0402466345486628	0.471825289835535	0	0.0865965811669755	0.655743679591762	0.574838605801723	0.0333894252013638	0.0482775565640882	0.0622382105269709	0.0698915894701177	0.220186337301273	0.0846869617412142	0.0618159026375934
si:ch211-214j24.10	0.504630384624839	1.29270180384331	0.593559770084859	1.14991371082897	1.56461885934499	1.10028856963514	1.51029388385358	0.695091840160426	2.28121408972449	0.427111948968163	0.996355291110433	0.617971323210867	1.07940315258416	1.20677982714215	0.631880378012711	1.24634259989372	1.15600990224991	1.26006239087354
osgep	0.0381670392649643	0.0543409475955606	0.109521098326978	0.0760380048251032	0.0117513826441656	0.124385789873539	0	0.0661375661375661	0.0865965811669755	0.048267174966457	0.118864234047433	0.135065589232798	0.084478250171073	0.073774424580746	0.11115544548667	0.0357851613523722	0.15148229522874	0.117753657682821
apex1	0.0342985464220405	0.0920332205898774	0.100820845270149	0.0571065136356223	0.00618394770853818	0.0248883634337245	0	0	0	0.103968886830031	0.203742516654792	0.195312704176534	0.0461913812574797	0.051632663588933	0.134046831237941	0.0983658676990856	0.0762302042227996	0.108745828795425
zgc:113263	0.19895899224159	0.331522827261932	0.275408066433197	0.240927172441796	0.361589504955119	0.140467877370652	0.0674036128336479	0.653366591024615	0.238069274427198	0.1798577534429	0.316184611466093	0.324334152141449	0.393905940569443	0.540529666777044	0.336274485074377	0.166565666413736	0.354408498000556	0.602517366601052
si:dkey-14d8.1	0.0114610756928853	0.0327029579078915	0.00909624411169338	0.0109214603292234	0.0041581338295373	0	0	0	0.05780848050409	0.00657946405718186	0.0256854918554704	0.0250274861143286	0.0126799784689905	0.0375787274339742	0.00606170818936776	0.0113499548657044	0	0.0215513471729651
selenoo2	0	0	0	0.00185996543440237	0	0	0	0	0	0.00220774721823593	0.00046943168815991	0	0	0	0	0	0	0
si:dkey-14d8.20	0.00258822758354774	0.0193281019736576	0	0.00519151768308796	0	0	0	0	0	0.00154640769492469	0.00168850357066698	0.00278719462450496	0	0	0.0483617458590255	0.0101483691570765	0	0
BX324164.4	0.00720052247277729	0.0102053371634245	0.00517892427826606	0	0	0	0.554560038955672	0	0	0.0126076825312295	0.0239564286761777	0.0159496595626567	0.00582324698428597	0	0	0.0290088141263585	0.00470295656067143	0.045586123583981
si:dkey-14d8.22	0.000258647176463873	0	0.00109542463040373	0	0	0	0	0	0	0	0.000533015286665215	0	0.00374407032861705	0	0	0.00280542052131446	0	0
BX324164.3	0.00800269406001579	0.00583397589055953	0.0119653919616078	0	0.0227842333105491	0.0092167597559402	0	0	0	0.0046521558397652	0.00574133242181609	0.0185405751631994	0.0197486769350242	0.0183082114159021	0	0.00134388660607351	0.0396881183616715	0
mapk11	0.00171197737538874	0	0.113865938789196	0	0.142746321062831	0.00784889310984918	0	0	0.060084960133629	0.00421865350234355	0.0189423871348332	0.127618594080488	0	0.328244489396142	0	0.00596422419757328	0	0.0470743303676505
mapk12b	0	0	0.00739737045072924	0	0.106474753811745	0	0	0	0	0	0.00194449629767905	0.00577083404282711	0	0.11088529363953	0	0.00372767680743865	0	0.106419161248105
si:dkey-14d8.6	0.00137098759914297	0	0	0	0	0	0	0	0	0.110874778835451	0.0212154107711182	0.00760708216110518	0	0.00739693663266295	0.019100805399735	1.0448350805364	0	0.0392848584370126
si:dkey-14d8.7	0	0	0	0	0	0	0	0	0	0.024688825224434	0.0116633223974251	0.00399001725669792	0.0143302670226402	0	0	0.0101483691570765	0	0
vegfab	0.221861007923177	0.028761391495227	0.0412564686222809	0.0366696774588754	0.0555692907569273	0.010769015388923	0.876552227903579	0	0	0.246066612718003	0.0711105965080828	0.052935409761893	0.0151138150534246	0.131911313108795	0.0698990153458142	0.153310620700359	0.123555568953669	0
mrps18a	0.0997617378334352	0.0733632197401883	0.149103941831826	0.0434551644350619	0.0379441661017079	0.0878881239944091	0	0.230489538439545	0.0630859103927729	0.0922963638632906	0.0845877511325978	0.211594503373895	0.105756457687886	0.102037878266455	0.0797034042657952	0.0574833907606754	0.20934593181186	0.0119764208226843
rsph9	0	0	0	0	0	0	0	0	0	0	0.00181812297711092	0.00230704700867622	0	0	0	0	0	0
tmem63a	0.0080881410335012	0.0913441566772879	0.122596137259695	0.0147763651971208	0.246735724260209	0.046831898319323	0	0	0.150032974221183	0.0196226636411098	0.180919144567997	0.123888567782248	0.0250594347662271	0.216105868059159	0.171395956601987	0.0151559678839269	0.0352125899378789	0.184722187772949
faxca	0	0.000775872235567225	0	0	0	0	0	0	0	0	0	0	0	0	0	0	0	0
ccnc	0.0372174888067235	0.0330685551765744	0.0483861743221487	0.0577860421065745	0.0769009412949842	0.0424055838835421	0	0.0885959316748175	0	0.0455650825336895	0.0605203596504242	0.0525060924584494	0.0570749297598388	0	0.155669797692883	0.0775190997465884	0.242797058761125	0.16089756204017
ngs	0	0	0.00210375819571599	0	0	0	0	0	0	0	0	0	0.00489904297195543	0	0	0	0	0
pgm3	0.172491197338222	0.244205280995438	0.0730724166447308	0.0482720090776724	0	0.0360291763010528	0	0.106223904471794	0.060084960133629	0.276875523885496	0.265196566677985	0.070032743739118	0.043294200389761	0.0116194423481034	0.0269928370337435	0.0481796965894289	0.0844894059482744	0.0106584218799495
si:ch73-352p4.8	0.00227601929991887	0	0	0	0	0	0	0	0	0.00558405957227425	0	0	0	0	0	0	0	0
foxm1	0.0059297475732743	0.0413041149885957	0.0355441598426174	0	0	0.00837805118151467	0	0	0	0.00612487204517725	0.0299914511826772	0.0166214364641796	0	0	0	0	0	0
si:ch73-352p4.5	0.00780847908874485	0.020564219020331	0.0122299310873001	0.0088736423720407	0	0	0	0	0	0.00332402263939028	0.00374345569313835	0.00440692500327263	0	0	0.0206878717351952	0.0470969586354569	0	0
pex26	0.0231936914025801	0.0580218623986166	0.0623323777950964	0.0358812298235242	0.0944122579850188	0.117797296057903	0	0	0.0816546498240342	0.0369896452197174	0.0849631205511913	0.0644347298549481	0.0566838933002069	0.07754329881255	0.0779095488983192	0.0542249061948719	0.115786049740537	0.0750590915849707
usp18	0.0191685596903905	0.0347762812301651	0.0666725454941766	0.1481006834569	0.233761523331189	0.0704039276771961	0	0.282668913200089	0.0816546498240342	0.0189109894241106	0.053189210118153	0.0627517283867437	0.0697424616997392	0.234379402063215	0.0133103346096691	0.0260368572739698	0.0877072224984609	0.259933435462676
lyrm5a	0.0546201157954208	0.0685907607969212	0.0532828135794885	0.0290764262627544	0.0767217752480802	0.111841386262453	0	0	0	0.061728232909799	0.0692018384196861	0.0427157537977096	0.064471740201843	0.0632431887242978	0.0140462794511473	0.053043515596159	0.0820538097844955	0.0403533086421347
utp20	0.0464735219474525	0.0939120242581138	0.0275270681941897	0.0513834781193889	0	0.0207352838645112	0.378059095902924	0.0402149084708683	0.0695778018980824	0.0366363747099022	0.0614107841805148	0.0447562171439733	0.0704622528471373	0.0217521344281908	0	0.0322288789228924	0.0112784838108643	0.0021316843759899
arl1	0.189746539606949	0.770034617008615	0.56345834856672	0.685194011594683	1.23463566456704	1.03210616976482	0.629202140136099	0.535460495015967	0.964102109720386	0.243614125879879	0.98234299044851	0.709986812108065	0.577800977654668	0.888709778619902	0.911437859040124	0.511626554289822	0.81497725305138	1.07012115294099
tfec	0.00811303075180139	0.0130058461278345	0.817749660812507	0.0178922951785936	0.123619331922301	0	0	0	0	0.00893500915564538	0.00970502340553282	1.00392673364228	0.0177592471203707	0.197071315416627	0.0780494620718035	0.0406838590102931	0	0.0206584680093294
si:ch211-262n1.4	0.00538058922602644	0	0.289416428071071	0.0237071682055876	0.0436895039842944	0	0.366501740883269	0	0	0.00697381335990652	0.00332653823869038	0.450558141349729	0.0859531833982732	0	0	0.104173417872695	0.0741781460686786	0
CR356233.1	0	0	0.004657119571545	0	0	0	0	0	0	0	0	0	0	0	0	0	0	0
foxp2	0.0032502477817808	0.0385072808912613	0.00300958613375323	0.00544024946807961	0	0	0	0	0	0	0.00374415578554873	0.00116850632407308	0	0	0	0	0	0
si:dkey-112e7.2	0.273581808383404	0.870044003705188	1.61639556289273	1.72856122763891	1.98668536840816	2.75913445207525	1.79157329045255	1.3019937196277	1.57190684256248	0.252392587305502	0.774064550021485	1.49448967539372	1.84343769618723	1.84510238330434	1.5761690152565	0.842756949010759	1.5330352278536	1.61370923258198
gpr85	0	0	0	0	0	0	0	0	0	0	0.00247067606399601	0	0	0	0	0.00814685189349132	0	0
BX950217.1	0	0	0	0	0	0	0	0	0	0.00131545299465505	0	0	0	0	0	0	0	0
tmem168a	0.00398303355419881	0.00248399405140076	0.00665375220372986	0	0	0.0101008570577213	0	0	0	0.00144781940237935	0.0133326198535051	0.00470484412453095	0.00219946267126941	0	0	0	0	0
ifrd1	1.37540694966134	1.25953993405794	0.971729624391999	1.40508129335498	1.50191595210163	0.901192128788369	1.05619344177125	1.01766242365155	1.86411642664491	0.840538519980151	1.14367897334295	0.799139045285143	0.906602866384107	1.80433933033741	0.376917180675462	1.46883251880288	1.01703083378788	0.843047650571089
dock4b	0.0135120479010615	0.0310918708671295	0.328074430029318	0.312032816939946	0.0736295406537646	0.234440837587448	0.0674036128336479	0	0	0.0308373123205208	0.0384317321274068	0.322015032017659	0.196527511081305	0.0719986772606068	0.221114391675299	0.107878061107772	0.0235622069797981	0
CR388190.1	0	0	0.0191138576999021	0	0	0	0	0	0	0	0	0.00194098118111387	0	0	0	0	0	0
lrrn3b	0	0.000681036537610243	0	0	0	0	0	0	0	0	0	0	0	0	0	0	0	0
CR354372.1	0.00110716652282728	0	0	0	0	0	0	0	0	0	0.00430842257699477	0	0.00540970392690408	0	0	0	0	0
tnni4a	0.00258690478485148	0.0385866176648611	0.00481486367676472	0	0	0.011215728938263	0	0	0	0.00225162366154343	0.0266126133622775	0.00541440202333519	0	0	0.00606170818936776	0	0	0
cald1a	0.000492457084088722	0.000991647354334441	0.0133442696453257	0	0	0	0.733003481766538	0	0	0.00788151154272954	0.00258334179050311	0.000778434560314861	0.00333213376517787	0.034854013962518	0.0253052445119251	2.68182224834687	0	0
tnnt2e	0	0	0	0	0	0	0	0	0	7.71329878227992e-05	0	0.00237348776194108	0	0	0	0.0154949798026929	0	0
BX649411.2	0.00391308057812717	0	0.0113974779351558	0.0192127845255618	0.00775990843308049	0	0	0	0	0.00744669138957908	0.00032950160312415	0.00709316850403787	0	0.0682605879978761	0	0.0112249417915225	0.0376876765712922	0.0194196627969752
BX649411.1	0.0104868047940531	0.0122274800386388	0.00650468248057774	0	0.110067054178193	0	0	0	0	0.0266970733257076	0.00703940349295065	0.0257708548806653	0.0034308259713526	0.861616821333619	0.0422609614368727	0.00290816029779561	0	0.0367942100262589
lta4h	0.510237871081841	0.155136097394065	0.128278398256689	0.0444542018251672	3.64643406555721	0.0314018599791937	0	0	0.30018332248623	0.305802137429928	0.0884378242961391	0.334493476344751	0.0707236395098121	3.62207505272161	0.13061139606022	0.0741241223624377	0.0479889407100203	0.0567177347210688
elk3	0.032396766201854	0.115786871850241	0.117700250966384	0.0759518701464268	0.233378466646838	0.086532658174164	0.188058298072402	0.0885959316748175	0.233985717261026	0.0310253118018761	0.113435452981128	0.113178970633268	0.0173133424259616	0.173118641579867	0.45646654160617	0.0409256945845587	0	0.0390060777622784
cdk17	0.0311130670341004	0.048073483417348	0.0460929462692047	0.0980405645957379	0.048723413545924	0.010769015388923	0	0	0	0.0292973043542012	0.0488289256359022	0.0516650753691466	0.0746038213354129	0.0337819172280081	0.0147557916482219	0.00498203841450421	0	0.0404447302538716
si:ch1073-67j19.1	0.0325343528380021	0.00148385565052232	0.00701815084902851	0	2.18791024661691	0	0	0	1.44203904320709	0.0102761980816397	0.0112521276487012	0.0401061157548774	0.0129055246306986	0.330461941879127	0	0	0	0.579060506118999
si:ch1073-67j19.2	0.00227884050695968	0.0176458402844012	0.127994643812262	0.0732452491704634	0.129266439631974	0	0	0.0414593698175788	0.12250849130794	0.00863051407851285	0.0136338622173981	0.0393462368017469	0.0386465391756962	0.0932632857708825	0.0147557916482219	0.0143696018914035	0.0476342043133472	0.0428441329354607
phyh	1.24075927173347	0.253906083706091	0.174350100648211	0.284998455374251	0.0735312242584657	0.196740239142047	0.310655483069276	0.452604205355595	0.254847812157985	1.092721287671	0.318245348750408	0.125715580486951	0.265611311364785	0.25463060436677	0.137151576720788	0.180615447536911	0.165862001466739	0.172143281786709
ucmaa	0.00115632990836172	0	0	0	0	0	0	0	0	0	0.000301702628614322	0	0	0	0	0	0	0
mcm10	0.0034165361233348	0.0213422196280775	0.0256785675180983	0	0	0	0	0	0	0.00769406448337873	0.00525079020413394	0.0265130415701635	0.00121194639803471	0	0	0.00780806965038487	0.0362567096913984	0
nudt5	0.0684323463534468	0.0745009095088857	0.195870575446565	0.0891039856742892	0.0391988413147665	0.0152244823081291	0.134807225667296	0.139002396825304	0	0.0710351443063855	0.0922415672726696	0.265166275677674	0.0944854801657969	0.0429190224895445	0.0795146845143268	0.159708397506479	0.157557997145929	0.160077178610933
cdc123	0.0352317729741421	0.0355337892023237	0.0493957072030615	0.0905554457166084	0.0723842440845429	0.0835933610264631	0.188058298072402	0.104979443125083	0	0.061427665562852	0.110375784996368	0.143201796133452	0.0789553779910049	0.0977338677713362	0.0601318398238149	0.0775864783936723	0.169118709611367	0.0862253120938365
camk1da	0	0.000681036537610243	0.0270343855764295	0.0443605544783936	0.0171460802964059	0.00883462466097128	0	0	0	0	0.0324426494873349	0.0117144693600427	0.0765166025161152	0.021084591380619	0	0.0126844799256449	0.00777658795981993	0
ccdc3a	0.00218988588066699	0	0	0	0	0	0	0	0	0	0.00342116891858629	0.000351132805344297	0	0	0	0	0	0
optn	0.701407109360816	1.37045252422332	2.25441632652358	5.52494356833528	1.77909258094493	0.888046277301607	0.999370062041476	2.67211747992284	1.08788133202732	0.392741431665817	1.1178105778805	1.69004170044887	3.03867016784041	1.65658308678305	0.886982210370753	1.13152960790079	1.95015035408545	2.13580733853653
si:ch211-240l19.8	0	0	0.00103794692437643	0.0113361627401073	0	0	0	0	0	1.39546613735623	0.391282307764201	0.176497954664023	0.335979275886919	0.370281485047135	0.337906856639314	1.18951358316712	0.287210010242729	0.188365019308596
si:ch211-240l19.7	0	0	0	0	0	0	0	0	0	0.0170359808386151	0.0125191978608478	0.00250369046168017	0.0140160782518213	0	0	0.0240244151215916	0	0
si:ch211-240l19.6	0	0.0141700371321496	0	0	0	0	0	0	0	0.0824069567307014	0.031684871774501	0.00906048118472608	0.0360350268001741	0.0414372081266653	0	0.109970809443919	0.023994653775079	0
si:ch211-240l19.5	0.00218824797050942	0.0282181076860507	0	0.00582377427417174	0	0.010250943086764	0	0	0	0.193963870577857	0.0784076129806907	0.0319462324384428	0.0556095278227365	0.0841090878541302	0.0122106392097002	0.0921191756476156	0.0456424311855774	0.0504541270780796
wnk1b	0.065466935512468	0.426454514798013	0.240785249093422	0.499919298916768	0.670688949896792	0.399052198729392	0.134807225667296	0.779518431889336	0.9946222576226	0.0947806227954774	0.422237203682295	0.209854216451763	0.323737370782984	0.304296439223681	0.386144708900401	0.20604395933852	0.549431496930695	0.458443906069094
RF00001.11	0.000906487230541005	0	0	0	0	0	0	0	0	0	0	0	0	0	0	0	0	0
ERC1	0.095163468488637	0.279961025464957	0.0248449936027032	0.00562427482006539	0	0.0888222354602929	0	0	0	0.106289924489053	0.267493945587596	0.0290858210247927	0.0131039940443338	0.0421953646461978	0	0.0618667251883164	0.0112784838108643	0
wnt5b	0.00756217957978686	0.0335936878890297	0.00094488629427312	0	0	0.0171472117974605	0.310655483069276	0	0	0.000176525149043714	0.0197551869164529	0.000445947803860918	0	0	0.00622732863170022	0.0807076252936165	0	0
fbxl14b	0.0052010075354991	0.0210229978015528	0.0813785553397003	0.0617221426648095	0.892277674549576	0.0264256187785098	0.0674036128336479	0.0414593698175788	0.060084960133629	0.0105633329527508	0.0194506991080436	0.132500076464577	0.0528204300309024	0.382801787554156	0.0149452669430045	0.0501409340985335	0	0.0330405936733871
adipor2	4.38102808270475	2.29070290076174	4.83621264947667	4.84425189112692	5.93523745496047	1.51447912954119	1.56441646040358	3.29874650634708	3.33144325426194	2.95554527990779	3.16700715920102	4.21371122533036	2.57519482337011	5.58499269178993	2.19001108513858	2.02758822233285	3.03524706340476	2.49925571001907
BX842699.1	0.00892916642447225	0.0129718320672741	0	0	0	0	0	0	0	0.00265532947699348	0.0012389061334376	0	0	0	0	0	0	0
ttll12	0.0131448203598771	0.0139608971464217	0.024922513583953	0.011430081101705	0.00399147421108512	0.0800817891740328	0	0	0	0.0060875729910312	0.0113375913183014	0.00952449910166567	0.013412721318191	0	0	0.00689717486035569	0	0
pnpla3	0.0535388734846634	0.0114914719275009	0.00221370795753408	0	0.0189492633473874	0	0	0	0	0.0415997094179795	0.00944445981343729	0	0	0	0	0.0108479316385201	0	0
scube1	0.000202301724282333	0	0.00927152956314457	0	0	0	0.621310966138552	0	0	0.000697677749761018	0	0.00375775646491308	0	0	0	0.0279646850500361	0	0
samm50l	0.0194529884755571	0.0674647646102407	0.0160882365607148	0.0185316655534412	0.00816943406245532	0	0.188058298072402	0.083903879715398	0	0.0256259970046285	0.0546269701290445	0.0230828695592546	0.00868222752894875	0.0107228831688264	0.00768447543849538	0.061175876115081	0.00470295656067143	0
aldh1l2	0.0093739668007628	0.057515168158299	0.00987977685225506	0.0173992946439609	0	0.0266308038508142	0	0	0	0.0154711890165371	0.0898041568663908	0.0142722866208831	0.0156185808255601	0.0310505005340686	0.136596076231235	0.00896483393638302	0	0
si:dkey-48p11.3	0.0105539777581948	0.0262533351704024	0.0217303753326477	0.040165889954689	0.0310510790249961	0.0167651312403317	0	0.0627321088025695	0.05780848050409	0.017273637338126	0.0236317985869742	0.0191882949304705	0.0914578934113501	0.0361233830270672	0.00605455150909696	0.0186184493686653	0.0608368720241864	0.0021316843759899
slc41a2b	0.028451820561332	0.0599440153842773	0.040347720216152	0.117422325382253	0.144360466051132	0.193977336537004	0	0	0.106658702816856	0.0196567297596621	0.0553340283320544	0.0626923416853404	0.114205261516328	0.0980983307612361	0.00613788764596664	0.0151352983532887	0.0355608430236415	0.0560226620422198
chst11	0.00381457617410308	0.0826233281446248	0.181471080230703	0.0969848288534257	0	0	0	0	0	0.0108704849636777	0.0714679558390348	0.0448439076359536	0.0472378125459797	0	0.0455840455840456	0.0803068420874654	0	0.0206584680093294
nfyba	0.0613081693689367	0.325716921201071	0.479311759340477	0.380749141730881	0.293682233555289	0.239364667429463	0.498713781141679	1.06033240022204	0.802686219394726	0.102016234176828	0.289214673405663	0.536081148373909	0.552326225368491	0.709022328908599	0.183044826469471	0.321863417115314	0.656817120836603	0.752415793340596
hcfc2	0	0.000955222055695177	0.00398392758127145	0	0	0	0	0	0	0.00215464720494574	0.0052090007365527	0.00063566345307008	0	0	0	0.00287232514720666	0	0
avpr1ab	0.00021890666192077	0	0	0	0	0	0	0	0	0	0	0.00221983511281782	0	0	0	0	0	0
srgap1b	0	0	0.00250496657698728	0	0	0	0	0	0	0	0	0.00508868208230073	0	0	0.00606170818936776	0	0	0
si:ch211-125a15.1	0.0103036765233258	0.0290656322618943	0.0369516082169884	0.00888914252466848	0.0274929606801043	0.0415066417418088	0.310655483069276	0.108350791661641	0	0.0168572892610682	0.0130349358792173	0.0221945516190751	0.0177420899192946	0	0.0683772590006563	0.00378755968760843	0.037245090754335	0
ipo8	0.0798636975205052	0.0886121869165211	0.0253102519133088	0.0639908162341861	0.0256364242315482	0	0	0.0692712662787476	0	0.0368390467407453	0.0643218994994841	0.0309418723519186	0.0327152826668888	0.0116194423481034	0.106901307793621	0.00805730111088736	0.0536508076896288	0
tmtc1	0.142822191518075	0.448059484216678	0.0396149049721926	0.0136819206853468	0.0142594361818934	0.072747076710856	1.2426219322771	0	0.106658702816856	0.0409288900416989	0.3371317444111	0.010655985066002	0.0199801742784326	0	0.141083118135335	0.0550765599216838	0	0
zgc:55888	0.0013158428859613	0.0011318542262305	0	0	0	0	0	0	0	0	0.0149295747515296	0	0	0	0	0	0	0
lmf2b	0.0140939434279704	0.25175893383172	0.214952740004554	0.00271813953134382	0.0247386975075762	0.329528812366043	0.310655483069276	0.0219900077404827	0.203966445636614	0.0173806361648756	0.249902800626479	0.12287948682506	0.00863590420908775	0.0107228831688264	0.178290995816125	0.062212928243178	0.00759988721767369	0.0021316843759899
kitlgb	0	0.001117158663342	0	0	0	0	0	0	0	0	0.0142352520768413	0	0.00430826497552906	0	0	0.00643376439554784	0	0
si:ch73-139j3.4	0.0343340315641615	0.0681876623254148	0.00149980847445781	0.00405619122832422	0	0	0	0	0	0.0398773921616792	0.0905036051566379	0.0115568964127032	0.00957481795609822	0	0	0.0263922276831902	0	0
lsm8	0.121356362183081	0.316352769860789	0.342368250167007	0.387681799142912	0.328336297770866	0.428077334901773	0.188058298072402	0.420129870154472	0.235363709183238	0.213098874832498	0.518236943540926	0.422163270121973	0.367567108210638	0.485283223196847	0.473851252458965	0.265909388301164	0.480167759748955	0.34912850169785
shank3b	0	0	0	0	0	0	0.366501740883269	0	0	0	0.00578745234032998	0.0031521001813088	0	0	0	0.0180949019205344	0	0
cdnf	0	0	0.000579079099772897	0	0	0	0	0	0	0.000184296412323857	0	0.00100360334397217	0	0	0	0	0	0
hspa14	0.0548308509728432	0.137488740302533	0.0640652848701864	0.183833952804127	0.0121410822517075	0.122510763477024	0	0.217893807990168	0	0.0534574026901602	0.122928834211918	0.107964139717413	0.161928114052275	0.0844848748288262	0.0228153028767886	0.0418517739044871	0.15572159875825	0.0405051879312225
dclre1c	0.0161138083210834	0.0108336986596524	0.0237692747114148	0.0125269736924686	0.0644947985526682	0.00927286805172406	0	0	0	0.0265940342202781	0.00523108322739575	0.0191480205056658	0.0192376518144546	0	0.0212388209212979	0.0274309440164358	0.0654812210036269	0
meig1	0.00756598022658382	0.0171317486639562	0.0130740073886656	0.00591925426867022	0	0	0	0	0.0864012994755441	0.00347511362739098	0.0383574271279782	0.026098493789532	0.0021438570990612	0	0	0.00591163291124274	0	0
tmem243b	0.0216365035875044	0.0549052528445045	0.137374041492332	0.124486842939744	0.0378522920507868	0.0851914975314296	0	0.378446224671546	0.294119440046919	0.0297515694280931	0.0885009767342579	0.235222940621652	0.0996852667873919	0.0464997628466481	0.0631838431544562	0.0601921538624152	0.0683201952941167	0.436457799924105
BX901962.2	0.000610291571105473	0.00193531780821388	0	0	0	0	0	0	0	0.00394710169618381	0.000271813524614672	0	0	0	0	0.00324401900216571	0.0132698503691672	0
BX901962.3	0	0.00113335509375113	0	0	0	0	0	0	0	0.00199837312862113	0	0.000406356636870566	0	0	0	0	0	0
BX901962.1	0.0035121475022604	0.00812905724600041	0	0.00564987073095768	0	0.00799159284432777	0	0	0	0.000576148821208208	0	0	0	0	0	0	0	0
dmtf1	0.00964834988183528	0.00651072950445292	0.0160677125312455	0.0281475196262472	0.0179018976011457	0.0336434938048274	0	0	0	0.0171320760210088	0.0368813261371098	0.0199475052092426	0.0389819106340954	0	0.0395021415616097	0.00471724540699486	0.051868858578579	0.0470743303676505
si:dkey-153k10.9	0.00844773365351997	0.00299278493642226	0	0.00698748798918462	0	0.00690202574455603	0	0	0.106658702816856	0.00727478948534778	0.0743715524165233	0	0	0	0	0	0	0.0368837645045404
tspan9b	0.0167347311363244	0.0698850668309527	0.0148915038467939	0.00602457907772129	0	0	0	0	0	0.0133829743919233	0.0870220739319667	0.0100421931078783	0.00628233438981257	0	0.03374340290352	0.2434348502192	0.0282703893115312	0
mical3b	0.00495239137875235	0.0503396075665148	0.0977804251480331	0.0141402759818265	0.00816943406245532	0	0	0	0	0.00903139385390846	0.0284375077132947	0.208259523301187	0.00390205072275734	0	0	0.069062351105742	0	0.0266562174294343
svopl	0.000607164746592635	0.0461201999753093	0.00138017938191427	0	0	0.412409414909746	0	0	0	0.00235130047577019	0.0351769725811233	0	0.00674022498871012	0	0.902887497863026	0.00362754145554375	0	0
si:dkeyp-27e10.3	0.00390824262985093	0.00645869663501905	0	0	0	0	0	0	0	0.000241626202331983	0.00156711294386711	0	0	0	0	0	0	0
parp12b	0.0514521718408255	0.149982612003531	0.180810594645299	0.108913261128367	0.840069094798278	0.0207352838645112	0.366501740883269	0.129623530646632	0.0864012994755441	0.0654564112828546	0.126594636823622	0.034637495885585	0.0677015700487107	0.090559028237224	0.0320215904510281	0.0479516913112856	0.0917838235967866	0.107164910814699
ttc41	0	0	0	0	0	0	0	0	0	0.00209879275765443	0.012931227785706	0.000504797265089185	0	0	0	0	0	0
hsp90b1	1.01121518178365	11.9539752862372	4.44712188900057	1.87399261434735	3.11020775561114	9.64795932832722	1.15999478340169	1.96553110406816	3.76361991887139	2.64156349096728	18.4989137513318	4.29324458551812	2.48481801103576	3.96593900870009	14.2753557848777	3.56011479136253	3.29771253012229	3.6877783192332
glt8d2	0	0.00205522808921334	0.00217583676698507	0	0	0.0671524023771951	0	0	0	0.000743273375947674	0.0348887647263247	0.0116795686968872	0.00684493149934802	0	0	0	0	0
fbxo18	0.0177320547320981	0.0369042963241432	0.0614492623504496	0.0363217982304831	0.0444700848537295	0.0380405486757145	0	0.0692712662787476	0	0.0206841638494218	0.04312334733007	0.0342865974920201	0.0351454343646088	0.0509239977632887	0.0554364900043406	0.0083986756215807	0.06216268114914	0
adm2a	0.0350446324707559	0.0298038100178713	0.00563303605435166	0.0113903998281879	0.0182431816108729	0.0191355254830212	0.0674036128336479	0	0	0.0307465646023501	0.0323963571366458	0.00262170398639635	0.016142168575562	0	0.0295115832964438	0.0440829403908002	0	0
si:dkey-22l11.6	0	0.00139383701027537	0	0.00983609400301689	0	0	0	0	0	0.0011391642675022	0.00854210235777198	0.0359776686994171	0.0930773393255821	0	0	0.047164530359138	0.0242206480742906	0
sbf1	0.197474155248097	0.336541091298602	0.265187424696692	0.651122021043016	0.592758637748184	0.379118367008127	0	1.32012844798807	0.0757363466301113	0.160527340762691	0.30386826951345	0.20656989827975	0.361125674531774	0.677982891468025	0.358524458816253	0.146071425394894	0.692289152834144	0.21882287832929
naf1	0.0113157261020315	0.0265432808770609	0.0195284383468748	0.0180844631856099	0	0.0886255632857861	0	0.0219900077404827	0	0.0299977206501842	0.0292754613090453	0.0352262230163183	0.0241095990304795	0	0.0709582802317713	0	0.0399960803841224	0.0180458834632938
ccdc136b	0	0	0.00229243160803399	0.00401249168912659	0.0265681872525838	0	0	0	0	0	0	0.00107841724440888	0	0	0	0.0145806162890392	0.0910850127466522	0
flncb	0	0	0.000632924611716574	0	0	0	0.310655483069276	0	0	0	0	0.00220876533908989	0	0.0217521344281908	0	0.0997483279181151	0	0
kcnd2	0	0	0	0	0	0	0	0	0	0	0.00297851079684246	0	0	0	0	0	0	0
tspan12	0.00129943927895674	0	0	0.0031637740280728	0	0	0	0	0	0.000960381571122786	0	0.00269966738506668	0.00270648080360828	0	0	0.0140865704272175	0	0.275473360256282
ing3	0.067407387150903	0.210813405456856	0.181576846516567	0.296971097234141	0.113124489616736	0.145376034284018	0.29218407596786	0.408276977377384	0.676017309677973	0.0761463643236615	0.178620022878425	0.23979970256573	0.291527417756923	0.490251331472605	0.294124916996506	0.274203759816554	0.404490573452339	0.447902629291542
cped1	0	0.00168968867486166	0.00248449118490105	0.0160330168877823	0	0	0	0	0.209006089937617	0.00129358730791175	0	0.0289803272733439	0.225101310058519	0.0704826261117883	0	0.0544943961419315	0.126885045901546	0.748080807829295
wnt16	0	0	0	0	0	0	0	0	0	0	0	0	0.0139422003725488	0	0	0	0	0
CR383662.2	0	0	0.00454881446523	0	0	0	0	0	0	0	0	0	0	0	0	0	0	0
CR383662.6	0	0	0	0	0	0	0	0	0	0	0.000603937673632081	0	0	0	0.00723693732812274	0	0	0
CR383662.3	0.000301726142068901	0	0.0100205329709053	0.0124861541678228	0	0	0	0	0	0.000258676613381489	0.000473785899942103	0.000663214737288931	0	0	0	0	0	0
CR383662.1	0.000829746890689477	0	0.00103794692437643	0	0	0	0	0.0402149084708683	0	0	0.000602449269554359	0	0	0	0	0	0	0
CR383662.5	0	0	0.00194478823978772	0.00896355882305549	0	0	0	0	0	0	0	0	0	0	0	0	0	0
ppfibp1a	0	0	0.00164093139265847	0	0	0	0.658685816851129	0	0	0.00108686201199896	0.00268734893262629	0.00393304174247763	0	0	0	0.0499751976798611	0	0
CR383662.4	0.00117074331195322	0	0	0	0	0	0	0	0	0.00117774865336219	0	0	0	0.0135832838675412	0	0	0	0
si:ch211-161n3.5	0	0	0	0.00452648855839487	0	0	0	0	0	0	0	0	0	0	0	0	0	0
si:ch211-161n3.4	0	0.005569293145314	0	0.00539610951296334	0	0	0	0	0	0	0	0	0	0	0	0	0	0
tmtc2a	0.00352492474285674	0.00166901162800401	0.00727484624798987	0.0778600513545523	0	0.0282102883210468	0.29218407596786	0	0	0.000776672699606413	0.00179023985844067	0.000883438766938212	0.0250786081826281	0	0	0.0686115582205405	0	0
mettl25	0.00421219213737551	0.00696692601528934	0.01030576097264	0.00700217846288493	0	0	0	0.0496978371501272	0	0.00655475197456368	0.0132420847947453	0.00843218998331913	0.0250679139898875	0.0275680310085213	0.0135253939270981	0.00198349415503942	0.0257613111476922	0.0205716025484101
ccdc59	0.0539898181115241	0.176606746511707	0.110528897626543	0.0912249024661232	0.0662889535572794	0.14471069658472	0	0.513667349797554	0.353548883995532	0.0577160473793623	0.156903834755345	0.105183286190643	0.163405475350995	0.144830455530619	0.0921334691880659	0.139240686070736	0.126813238958867	0.156145704589987
si:dkey-21h14.8	0	0.00372526887128078	0	0	0	0	0	0	0	0.0004874645564521	0.00403433976319147	0	0.0185839890218964	0	0.00693397125868913	0.023778272365843	0	0
si:dkey-21h14.3	0	0	0	0.0028151132168158	0	0	0	0	0	0	0	0	0	0	0	0	0	0
si:dkey-21h14.12.2	0	0	0.00164093139265847	0.00563022643363159	0	0	0	0	0	0.000927446250779982	0	0	0.0234163703845358	0	0	0	0	0
si:dkey-21h14.9	0	0	0	0	0	0	0	0	0	0	0	0.00100263251192331	0.00780545679484528	0	0	0	0	0
cracr2ab	0	0	0	0	0	0	0	0	0	0	0	0	0.00233960542554498	0	0	0	0	0
prmt8b	0	0.00439811760566478	0	0	0	0	0	0	0	0	0	0	0	0	0	0	0	0
tspan11	0	0.0381480714088012	0	0.00530691762018709	0.021998570092944	0.0672652378219838	0.0674036128336479	0.141309472686475	0	0	0.0272438790404526	0.001776935222534	0.0100192671471474	0	0.0849393262685214	0.0190966276978562	0.0278648554510624	0
BX784029.2	0	0	0	0	0	0	0	0	0	0	0.00109304167483715	0	0	0	0	0	0	0
BX784029.3	0	0	0	0	0	0	0	0	0	0.00105443321683955	0	0	0	0	0	0	0	0
BX649349.1	0	0	0	0	0	0	0	0	0	0.000811319530083728	0	0	0	0	0	0	0	0
sema3aa	0	0	0	0	0	0	0	0	0	0.0032855072175675	0	0	0	0	0	0.0291664356487431	0	0
pcloa	0.00581718465880678	0.0629971928440485	0	0	0	0	0	0	0	0.00464630454704421	0.140194848488319	0	0	0	0	0	0	0
ankrd16	0.00441865153151514	0.00238409654535546	0.00199200568279381	0	0	0.00684643112661447	0	0	0.0612047543853207	0	0.00215123172991041	0.000652501298477584	0.00186783393835588	0	0	0	0.022526804364721	0
gdi2	0.615583643820795	1.6979167176896	1.78829022979667	1.05587440314167	1.17354189924341	3.01223520279042	1.50662770283147	1.73315399384208	0.98757713809636	0.668104165254361	1.70067156978473	1.93817992812867	1.24660235451173	1.26808511411613	1.98999266575523	1.17379900248377	1.9011430872757	1.08572044511358
asb13a.1	0	0.00372526887128078	0.000609282009285336	0.00788128953346093	0	0	0	0	0	0.00764385069903822	0.00899137997195555	0.00933542810912825	0	0.0559749522223141	0	0	0.0118584293273187	0
asb13a.2	0.00221290563906303	0.00587490114406844	0	0	0	0	0	0	0	0	0.00110195776019592	0	0.00315749755688627	0	0	0	0	0
RF00001.15	0	0.0029943974823106	0	0	0	0	0	0	0	0	0	0	0	0	0	0	0	0
net1	0.615746145191338	0.326958824715933	0.254021903390992	0.0878145823290705	0.0787743433323648	0.68252468638141	1.35648934087768	0	0	0.481065082503216	0.447818748529833	0.132174589743759	0.107987185191047	0.0800164279345094	0.715626432392516	1.30003604476388	0.11860203519826	0.0525127981805847
mir29a-1	0	0.00888154681019246	0.00103794692437643	0	0	0	0	0	0	0.000162795858681734	0.00390282286031755	0.000598134919619041	0	0	0.0463284688441047	0	0	0
dre-mir-29b-2	0.00028359303412699	0	0	0	0	0	0	0	0	0	0	0	0	0	0	0	0	0
BX465862.3	0.106607877867626	0.196176812130175	0.0784000312248073	0.12690488241021	0.0296850417074836	0.0361454654512807	0.0674036128336479	0.0885959316748175	0.0853322410806475	0.0888040792651801	0.146921209971052	0.0718552949800861	0.0841433463199544	0	0.0132021426848068	0.159380432873611	0.152406723649323	0.0304932374546365
mkln1	0.0500001702617692	0.0536719793699106	0.0874993470212587	0.0685474195243649	0.0136492683992138	0.0850836968635649	0.310655483069276	0.419424145428429	0	0.0660486298402448	0.0718056514801471	0.0787881466672601	0.0984921412507261	0.115751044845398	0.00631014355576589	0.111331297288069	0.123074442036453	0.0021316843759899
podxl	0	0.00816357420887821	0	0	0	0	3.37543451004171	0	0	0.000210559600124122	0.0155195852724065	0	0	0	0.0212617608749875	0.170841681965735	0	0
BX465862.2	0.000261619202054108	0.000955222055695177	0	0	0	0	0	0	0	0.00103256483846111	0	0	0	0	0	0.00198349415503942	0	0
BX465862.1	0	0	0.00187412829607629	0	0	0	0	0	0	0	0.000546279278397263	0	0	0	0	0	0	0
BX649350.2	0.00462668426497844	0.0203756327818739	0.00542562326166608	0	0	0	0	0	0	0.00225872983194621	0.00728232974154055	0	0	0	0	0	0	0
cyb5r3	0.0882056848584801	0.157707020949503	0.179137421183547	0.0215402757312724	0.240330608386782	0.54357262098007	0	0.423981286080291	0.113938748299818	0.0826472679656149	0.192452598672933	0.165653564832593	0.0323565527080446	0.264219375520996	0.256164124510995	0.322246099043292	0.205878238536892	0.0545919408463522
BX005210.1	0	0.00138975748731846	0	0	0	0	0	0	0	0	0	0	0	0	0	0.0158649049531779	0	0
BX005210.2	0	0	0.0045310424801449	0	0	0	0	0	0	0	0	0.0010446607077827	0	0	0	0	0	0.0180458834632938
cry1a	0.179084382927066	0.423141496098149	0.497944213412329	0.748835421572594	0.55495301069092	0.369242877735895	0	0.932942121384606	0.30254798940585	0.115888205508297	0.29931064682101	0.265942026591484	0.590254384434957	0.287576605606685	0.157024903047405	0.403733035390812	0.899253776480548	0.193044061046692
tnnt2c	0.00111988039677362	0	0.0306224976786981	0	0	0	0	0	0	0	0	0.000373427789652159	0	0	0	0	0.0125120898067758	0
si:dkey-222f8.3	0.0782315673667197	0.606448536629128	0.659395730345955	1.00532933589141	1.42882183035733	0.846856052876697	0.0674036128336479	1.34034033196287	0.658165102191401	0.0719047568830235	0.458455544919796	1.0185206198315	0.733596167701661	1.15217985995721	0.740360369149748	0.220992785159263	0.611847916975397	0.470201994909965
braf	0.00537332472134078	0.0236713968613479	0.0321584568959808	0.0335053909253996	0.0869503395138962	0	0	0	0.192533548970908	0.00868155306039236	0.0297724592321254	0.0274562077768378	0.0218532505751944	0.136688193511196	0	0.00869483148296074	0.0433470660813221	0
mrps33	0.121492300451608	0.1011174813391	0.110460759887663	0.0866288047941511	0.129283033126405	0.149987921783705	0	0.287489212133778	0.0527339939144971	0.136765915687024	0.136932651123305	0.150041629760922	0.0682284798466917	0.0433662017944096	0.0707625867307656	0.13458312540648	0.0582640456613937	0.0632835650122055
tmem178b	0.00547460779417698	0.128793448894806	0.00762529623371348	0.0126150677102418	0.0964610985616573	0	0	0	0.0864012994755441	0.0134199505035573	0.223991716668327	0.0159855116595257	0	0	0.0298157973360391	0.0756494779712121	0.0247877548491045	0
CR792454.1	0	0	0	0	0	0	0	0	0	0	0.000222285884899657	0	0	0	0	0	0	0
cnot4b	0.155815247811127	0.234662433496992	0.179142741161217	0.119152829613879	0.343026758588057	0.484511642973519	0.0674036128336479	0.279728372134519	0.165844576383537	0.100584506798311	0.175879158213653	0.113981568010924	0.0874377932025171	0.266686330261694	0.268526536976379	0.0898628866689575	0.297845032558196	0.0482161830898438
mkrn1	0.0894605336619427	0.233950292561795	0.174664041182734	0.727645752912274	0.409448711826183	0.401218177351327	0.480242374040262	0.97434820897116	0.194846206349301	0.0848485770687818	0.307255581705143	0.175057699207388	0.58442029649881	0.443735624586198	0.463368950670483	0.21004380619363	0.790833459978843	0.319999715751576
tmem121b	0.00502818305394092	0.0130705178689027	0	0	0.032249742002064	0	0	0	0	0.00218883908680223	0.00134313716009228	0	0.00928207770027243	0	0	0.0140107693267665	0.014042833450591	0
il17ra1a	0.0282519987498046	0.349211403012873	0.0453404025655074	1.54405367604654	0.0394638182559623	0.0202940604809456	0	0.2678150576338	0	0.0507016366345361	0.433202094075958	0.025388200511578	1.06022389837551	0.1049205146686	0.0448601794918477	0.051369985864092	0.111411469472567	0.0622360176752322
pimr171	0	0	0	0	0	0	0	0	0	0	0.000766189585951148	0	0	0	0	0	0	0
rergla	0.00215955128835131	0.0253210649375646	0.00725849168975374	1.39233449821958	0.0287376050334683	0	0	0	0	0.00221186487303787	0	0.0200251892337454	1.19907380546644	0	0	0.34398346626772	0	0
arhgef39	0.0114630718822312	0.0191771977451587	0.0687159090958434	0	0	0	0	0	0	0.00865799399365182	0.0201753267063132	0.045440184160385	0.0154389552052357	0	0	0.00897539833576145	0	0
mgst1.1	0.113850245613881	0.0539419669833782	0.0282622878994221	0.0166345285321108	0.0347403161368768	0	0.376116596144805	0.0885959316748175	0	0.140509955204407	0.0190294852552116	0.015560095715573	0	0.0374388810267239	0.00622732863170022	0.0560298208049269	0.0774624336371335	0
mgst1.2	0.774809973907464	0.195116904804439	0.456744989385246	0.103297491002214	0.212740455388749	0.404891850431185	0.564174894217207	0.0496978371501272	0.269047737361159	2.16492582800951	0.312478826646813	0.475805581790495	0.143791899793522	0.532260052390123	0.441928998965413	0.428718258244727	0.0853323029643471	0.34705890533062
dera	0.0921213594595046	0.111736075286099	0.0828793684284617	0.0577949939930336	0.00814960804062242	0.149123716914697	0	0.176376243779258	0	0.0621921249455071	0.05251389061235	0.0786001805227699	0.10312188909411	0.0393490850951256	0.0366855646194152	0.0736831688981794	0.143988063442924	0.0304932374546365
helb	0.0129679056596703	0.0385526926923546	0.107672706317793	0.0234041660290891	0.0041581338295373	0	0.29218407596786	0.0552095755487832	0.0612047543853207	0.00567435297192177	0.0279290415450761	0.0601748852131746	0.0123259784907795	0.0153962691760533	0	0.0235555519314111	0.0186262402747743	0
irak3	0.116370594442064	0.387601653663835	2.74835925539841	1.44305006398648	1.9967506568867	0.826697536039762	1.77157586290858	0.653136929552517	1.6291303153581	0.0890515312174219	0.300951736076148	1.73320995242907	0.974153298979704	1.65299734017737	0.453439887312817	1.16171819973364	0.450954571225587	2.22630383048466
b2m	15.1771628410126	23.6950982496162	28.8594330370458	70.912534880814	52.5229897581182	19.0871198827636	20.6634353182297	25.0884302804463	33.3983078827308	12.8011444719848	24.2946565146987	22.2685802168259	62.8920585101288	46.2951065160894	24.7549773290062	17.3942839162417	37.5902072554913	39.2840035095847
hmga2	0.0435097536625483	0.0423337598763197	0	0	0	0.136786122726512	0	0	0	0.0237929074945331	0.0372878533543507	0.000947719786529111	0.00415838455076972	0	0.0455840455840456	0.0655492815727783	0	0.0341611724114372
BX119963.4	0.000846308225794357	0	0.00108690276730879	0.0120338426756145	0	0	0	0	0	1.91031026082505e-05	0.00348267993614158	0	0.00906721514509916	0	0	0.00426466875464849	0.0193617214893811	0
msrb3	0.039713779440984	0.0376601973618194	0.136918711343249	0.704774172505516	0.604785049678466	0.23669254282042	0	0.480262260929961	0.944013378694398	0.0687986794586277	0.12317260090033	0.138333465844022	0.781129378708187	0.253334420150178	0.142414357839334	0.357028449889424	0.572814698208093	0.891168586882308
lemd3	0.0109368285789942	0.0430209438068048	0.0418358120448856	0.029482296201902	0.0994128980253234	0	0	0	0.0695778018980824	0.0326630776771825	0.0501184819798504	0.0276977689354401	0.0389170643823734	0	0.0217417867116663	0.0461814719683491	0.0176436857659565	0.0757390854717902
wif1	0.00725833239946537	0.0133835309453747	0.00827836792849471	0	0	0.113571860320658	0	0	0	0.00914411464105718	0.0079755638780779	0.00623093982355048	0	0	0.0873776285443883	0.0936039556148246	0.0199782636491497	0
vhll	0.0112698777198038	0.110489965939096	0.157770136792846	0.379975035360461	0.296155313412815	0.0629194254564582	0	0.0885959316748175	0.329079438867212	0.0306104684675706	0.0875758009975377	0.136699007638646	0.337275013225391	0.406181697317217	0.0915187177530797	0.126509957436767	0.214003138989283	0.499414809136288
tmbim4	0.262767915721712	0.675393330737478	0.58573466540882	0.380389271530846	0.752810877087403	1.00763932581531	0.378059095902924	0.614894420919348	0.799436855448544	0.323150578923107	0.978796898015496	0.507381976365067	0.46788235482376	0.959976320743937	1.0680731193651	0.436927707834708	0.623505516565175	0.548883168602691
si:dkey-6a5.3	0.00074209164198922	0	0.00205030421388774	0	0	0.0152360018873268	0	0	0	0.00181810597050047	0.00337535010615076	0	0	0	0.00607275156373353	0	0	0
BX119963.2	0	0.000526953403091425	0	0.00556211885580541	0	0	0	0	0	0.000522172502521194	0.00954010590814159	0	0.00844173933597278	0	0	0.00138029654290928	0.0463561730197802	0
BX119963.1	0.00296511908370331	0	0	0	0.0111213056412823	0.00863188878674487	0	0	0	0.00138243426964501	0.000326774895819262	0.000958955643602601	0.00452971379003418	0	0	0	0	0.0021316843759899
grip1	0.000354521361596013	0.00868892769943262	0	0	0	0	0	0	0	0.000300360226532524	0.00831422474787826	0	0	0	0	0	0	0
BX470116.1	0.000936248189514596	0	0	0	0	0.0949879200568695	0	0	0	0	0	0.000871782957427787	0	0	0	0.0149718529165169	0	0
cand1	0.0770259597613436	0.200792315990632	0.208678694369651	0.205525729476975	0.0708270445194033	0.191359533962035	0	0.372178137554851	0.139135293390041	0.14351253656043	0.198845445551813	0.200988409573386	0.220245523824479	0.239937899024322	0.102176411848693	0.149857757392854	0.375717190368797	0.0021316843759899
si:dkey-39a18.1	0	0.00608714211700837	0	0	0	0	0	0	0	0	0.0136055847813863	0	0	0	0	0.0675466072587566	0	0
dyrk2	0.0751551183462004	0.109147562398243	0.0839789398487382	0.123428302570835	0.0704155651596299	0.103014055306977	0	0.156116623816255	0.306133062710118	0.0519142438452251	0.120021006541228	0.088526597687154	0.142514506963775	0.0903993845113854	0.0640330577972526	0.137993352854576	0.041995610739038	0
si:ch211-266a5.12	0.0202289883358467	0.0153293664627677	0.177335171063875	9.96639257952701	0.0218842324105482	0.0559033989266547	0	0.589193126794361	0.0630859103927729	0.0084040473073579	0.0284356450400368	0.147770616540672	6.50159229330969	0	0	0.00552118617163711	0.0649222365384249	0
ifng1	0	0.00892172082151205	0.00094488629427312	0.166051771539528	0	0	0	0	0	0.00424180313961301	0	0.00336103621818697	0.390444782373912	0	0	0	0	0
ifng1r	0.000323673806457694	0	0.0173446137234675	0.7891743126937	0	0	0	0.601444657356996	0	0	0	0.0135988031057503	0.508307211234543	0	0	0.0608760564539715	0.847207146756383	0
il22	0.00162357798921814	0.00108057759033359	0.00198265553371613	0.804978792006528	0	0	0	0	0	0.00180019882276302	0.0118889274486999	0.00324756382547265	0.331766424920032	0	0	0.00276059308581856	0	0
mdm1	0.0310051058982161	0.0242311764085037	0.0674083555576797	0.0975779544086383	0.0995572980417335	0.00863188878674487	0.310655483069276	0.197508024726116	0.0749788184837783	0.0142306539510953	0.0380140188215674	0.0650726537833505	0.108861113260337	0.0292027929551182	0.0232855610107914	0.0279485342689794	0.0161520180645875	0.0319017935188316
calua	0.0362411905629661	0.3987978857333	0.0666099137501147	0.0310327955783755	0.0472667253501948	0.145126409488034	0.584368151935719	0.658557516520655	0.0624235311743115	0.0703522176855007	0.619326665225959	0.0863032146083953	0.0626193724297257	0	0.379391518542268	0.505800957345429	0.167212265281211	0.176740739557195
tnpo3	0.0695393165530154	0.168585044955056	0.114491462833695	0.0851329504309838	0.0929799693846537	0.0511395036187516	0	0.288942959027924	0.137960334655521	0.0780376699033533	0.134623132078894	0.127520250686633	0.142927937939574	0.0813639715512546	0.114259027075264	0.111782210173971	0.179818499340655	0.216501634694588
irf5	0.0442807218829669	0.0909990067988492	0.630172965422718	0.111460391379344	0.447646251670948	0.141631556338591	0	0	0	0.0517644170871788	0.0767377279883648	0.690334083808911	0.0581249456566868	0.226537239645398	0.178285558542354	0.0634401711610222	0	0
ccdc87	0.00497559943296009	0	0.00355902920346999	0	0	0	0	0	0	0.00316185053681947	0.00191190697425426	0.0124939888351931	0	0	0	0.00362754145554375	0	0
pnpla8	0.12364681288825	0.177527814570487	0.0766801599662639	0.0716576861563039	0.108154653129091	0.0720267253085832	0	0	0	0.134643543198969	0.218772491343193	0.0957587389231597	0.0524251517825221	0.101515153680954	0.145821739757057	0.152013979160626	0.0303583152393379	0.0289025073914019
si:dkeyp-81f3.4	0.00359134354538572	0	0.00694843392609993	0	0	0	0	0	0	0.0101038161281928	0.006062096235015	0.00995068706428863	0.00512026903447307	0	0	0.0103936580883846	0	0
nrcama	0	0.010228665263013	0	0	0	0	0	0	0	0.000423027734713555	0.0540930965794207	0.000676216237453061	0	0	0	0.0224125864988669	0	0
cntn1b	0.00023608533682236	0	0	0	0	0	0	0	0	0	0.00324228170908368	0	0	0	0	0.00565354092756315	0	0
pdzrn4	0	0	0.00114214405337559	0	0	0	0	0	0	0	0.000304702194739439	0	0	0	0	0	0	0
gxylt1b	0.000442113719164502	0.0138301109174896	0.0110207966181035	0	0	0	0	0.0627321088025695	0	0	0	0.000641463851298929	0	0	0	0	0.054429433777056	0
pphln1	0.0341772680996329	0.0282337647158242	0.07399142085427	0.0271365418311053	0	0.111661611926447	0	0.127322098687737	0.0816546498240342	0.0542584465248271	0.0604156535195882	0.0769845614717997	0.0830066376837526	0.0789021077286844	0.042453717701075	0.0190352416915757	0.0904102713251761	0.0778569623220793
yaf2	0.0478076087808275	0.148386944698605	0.27082864326343	0.35511644914572	0.123090912593031	0.0536281403965406	0.188058298072402	0.732895340097449	0.498490237873973	0.0369477607009386	0.104246870603235	0.222418466824464	0.373304528316631	0.137973471597989	0.0899541694331206	0.22152685193166	0.526101927149053	0.601243505963092
zcrb1	0.0209224948320157	0.0222221390920531	0.042075483031188	0.0496759844319985	0	0.00927286805172406	0	0.0885959316748175	0	0.0297167794818543	0.0359415789970198	0.0395313850701401	0.0639197093928593	0.214026988201964	0.0583753510749502	0.0189689341946781	0.0349048276341517	0
prickle1b	0	0.0241127174773452	0.0023450870660475	0	0	0	0.471825289835535	0	0	0.000982327534719385	0.0219676903906	0.0027660316310151	0.00781631656082071	0	0	0.319848498822062	0	0
CU469420.1	0.00338134060893492	0.00300774494322882	0.00455032947193158	0	0	0.00796841321003542	0	0	0	0.00028207221306007	0.00719336358581203	0	0	0	0	0	0	0
CU469420.3	0.00200520815493912	0	0	0	0	0.00690202574455603	0	0	0	0.00267532673603206	0.00631078689782361	0	0	0	0	0	0	0
CU469420.2	0	0	0	0.00271813953134382	0	0	0	0	0	0.00165459539561477	0.000802794624422971	0.000305316923240761	0	0	0	0	0	0
CU469420.4	0.00571916687815407	0.00126173731133873	0	0	0	0	0	0	0	0.00635767406055525	0.0105591918349412	0	0	0	0	0.00802704962695994	0	0
CR786571.3	0.000579745870716555	0.00167238622756494	0.00144931106998288	0	0	0	0	0.0523516354650919	0	0.00288225345988301	0.0277875045222776	0	0	0	0	0	0.0338278971902549	0
CR786571.4	0.000276421774007985	0	0	0	0	0	0	0	0	0.00208862605754305	0.00308501816458695	0	0	0	0.0390777647518562	0.00329767882982526	0	0
si:dkey-234l24.8	0	0	0	0	0	0	0	0	0	0	0	0.00126041353663972	0	0	0	0	0	0
pus7l	0.00538448318500964	0.00312203307676945	0.00224860660178674	0.0290839913183246	0.0218842324105482	0	0	0.0523516354650919	0	0.00597198783438367	0.0052057072100915	0.0114946242223392	0.00586887179743002	0.0292513126526553	0.0724244070251675	0.0042355795458781	0.0711598485226183	0
twf1b	0.371002176976627	0.373543643296515	0.114615970431792	0.113369070584089	0.190039941523252	0.26354826053591	0.134807225667296	0.240814445673912	0	0.338241056664057	0.482520203667029	0.0831927371026589	0.105782995801297	0.0583637981720263	0.314774096568789	0.214637169649343	0.0560362789622546	0.0488527967122324
nell2b	0	0.0021185677634492	0	0	0	0	0	0	0	0	0.00661921527481119	0	0	0	0.0142808689908781	0	0	0
nuak1a	0	0	0	0	0	0	0	0	0	0	0	0	0	0	0	0.0629457593567824	0	0
plxnb2a	0.14446420342171	0.340341313314991	0.0394777012421985	0.0431214356060741	0.0204433838904315	0.168803319283177	0.480242374040262	0.069816800714924	0.0695778018980824	0.124464254013687	0.220453831519371	0.0373335066714876	0.0106923094440462	0.0219967312857309	0.111254431008225	0.317000851843043	0.0291428551839719	0
plxnb2a.1	0.0159004506469004	0.0270300288926768	0	0	0	0	0	0	0	0.0100598834663283	0.016918934314522	0.000757349814880985	0	0	0	0.00348567110322885	0	0
si:ch211-127b11.1	0	0.000780192473483208	0.00941653042993466	0	0.0394512046106683	0.0310090186157048	0	0.0744180508424123	0	0.000957738161515175	0.0060990805805684	0.0514552273583856	0.00398862444308831	0.0997421554616388	0.0061122826319489	0	0	0.0330405936733871
si:dkey-183c2.4	0.0054936313385383	0.00516896485399034	0.264614813352567	0.0115589495548452	1.34824228653439	0.169763892628305	0	0.271918109718357	0.115191444776098	0.00914466457628567	0.0138351305062394	0.525994661538254	0.0305589905048813	1.78767746584499	0.094283425832378	0.0714349875779798	0.142161188396059	0.302058019367999
abcc9	0	0	0	0.00692009436240673	0	0	0	0	0	0	0.00263906899607506	0	0	0	0	0.0781521008763632	0	0
kcnj8	0	0	0	0	0	0	0	0	0	0	0	0	0	0	0	0.015172757011331	0	0
RF00015	0.0096606584106954	0	0.00273060953212098	0	0.0142594361818934	0	0	0	0	0.0118962062338039	0	0	0	0	0	0	0.00450254528885179	0
cmasa	0.0880353641875857	0.246041071325212	0.0250744298620139	0.0301497188378662	0.0725171797646068	0.0549720058167883	0.0674036128336479	0.17111129089417	0	0.0696725743752534	0.281873430308389	0.0281623540091073	0.0416046581928159	0	0.0602385210946875	0.03623844366965	0.032245997503759	0
shisal1a	0	0	0	0	0	0	0	0	0	0	0.00301424955236775	0	0	0	0	0	0	0
si:dkey-14k9.3	0.0138634418432708	0	0.00415636505907814	0	0	0	0	0	0	0.00619218220345372	0.00520121386344568	0.00135335358311188	0	0.0309345641165243	0	0	0	0
akr1b1	0.909497009008286	0.109162004559776	0.0866793165957733	0.114936780579068	0.0997420474026955	0.0855191244244499	0	0	0	1.62308975767984	0.435785499364873	0.122955309282188	0.127623492183327	0.149098529091605	0.244777699240841	0.1526238632135	0.128519702630609	0.131337606940471
si:dkey-180p18.9	0.05185671401429	0.259259706073549	0.789807380921476	0.315102798778855	0.292761251006031	0.342787454387665	0.433905353716917	0.743669445215361	1.04158258312804	0.077175882311472	0.242400592596471	1.03505942125073	0.463831246529414	0.479590762215622	0.355047278426077	0.465809546054749	0.515379715139691	0.3576354155325
prdm4	0.0106674854987392	0.0415329888107388	0.00172122315314849	0.0240947476960283	0	0	0	0.0402149084708683	0	0.0152594769149584	0.00518615285407277	0.00800140112184209	0	0	0.00693397125868913	0	0.0110285075892675	0
psmc2	0.116955015091253	0.345537741090096	0.336625118012787	0.199117902153461	0.235211341236168	0.297528774288257	0.134807225667296	0.267292092026525	0	0.249316157056555	0.556456922375969	0.404647195992993	0.274696068854035	0.399953599711895	0.214996250031087	0.273374054807424	0.217391105744315	0.104006767165949
slc26a5	0.0422669497413427	0.198340150049963	0.176275147990631	0.132273631540306	0.457804914398123	0.100064588213147	0	0.206250455374195	0.0783520986609626	0.0787964754929779	0.330752337350428	0.143143763013655	0.245561498580669	0.540454406734584	0.302320263564583	0.0736502778297369	0.199329194221546	0.44089187677413
tspan33a	0.00376165854409529	0.0264896285586972	0.0524297884915583	0.344286263953156	0.128528985316496	0.0130677103411326	0	0	0.12254241099523	0.0144844780844727	0.0415416272574026	0.128390633015698	0.285467313065202	0.0475201297763403	0.0979362075448203	0.0908399149315696	0.142517111391056	0.038773365799565
smo	0	0.00601760751960236	0.0023450870660475	0	0	0	0	0	0	0.000651846629353227	0.00342197006570155	0.00691881599685609	0	0	0	0.225883142218106	0	0
klhdc10	0.00823768762777358	0.0683227208186958	0.0264651951976444	0.0328415140396797	0.0549077537245359	0	0	0.0219900077404827	0	0.0217937421921253	0.0258052687574331	0.0367720709629236	0.0155609325564462	0.0424499815331325	0.0786788798643986	0.0231271432846224	0.18224538412897	0
zc3hc1	0.00583131042621663	0.0321331011286826	0.0328577331284544	0.00489973330842456	0.0250269039217158	0.00837805118151467	0	0	0	0.0113300378588722	0.0221031685872736	0.0310816870311658	0.0214772451754874	0.00580972117405169	0.00603509407202885	0.00871191134573283	0.0526542124551694	0
ube2h	0.0472688914111815	0.147513384860652	0.120266300218834	0.137848734326907	0.414166223351874	0.21220769022886	0.0674036128336479	0.490805132776508	0.222780154036075	0.0547186720195255	0.123576248510306	0.0975755669347635	0.171408278445628	0.179877607224087	0.0206964138920265	0.102410061735646	0.201076879563347	0.217583318259771
nrf1	0.030305340435324	0.115755528580935	0.14818340936608	0.103637946312667	0.156571957408267	0.0840266267918024	0.621310966138552	0.10366428602893	0.0527339939144971	0.0444734506019925	0.127726156861226	0.134088527589402	0.186325899201347	0.127047951270116	0.0346811966947242	0.07360298500991	0.242253166971712	0.082759953844749
AL590150.1	0.0043035043775265	0	0.00365183693060039	0.00121299986511441	0	0	0	0	0	0.000332105428861025	0.00187898789406106	0	0	0	0	0	0	0
BX537358.1	0	0	0.00184443857503102	0	0	0	0	0	0	0	0	0	0	0	0	0	0	0
plxna4	0.00375432598808553	0.0149611581240358	0.0020751890808531	0.00502346207964297	0	0	1.55327741534638	0.0885959316748175	0.584725061735016	0.015281123513445	0.0979182382705263	0.00384712351112205	0.00470615918583446	0	0.0211867139465864	0.351898759937651	0	0
chchd3a	0.139042073201085	0.153255294563174	0.140535925867504	0.148641016645219	0.103670400486819	0.26482541012594	0	0.0755530192672428	0.0783520986609626	0.134616786764217	0.217782607907971	0.229983611792774	0.226647505108533	0.250878632609991	0.0612174870036348	0.141036690779388	0.171345686165115	0.248814984337899
exoc4	0.015361974396246	0.00744503356717132	0.0365441171639384	0.0257409676007874	0.0518316621306785	0.0535947793468804	0	0.157739709908143	0	0.0265200697021764	0.0594867031710801	0.0527373767411877	0.0370811605071364	0.034854013962518	0.0738175309224269	0.00440865476235695	0.0163791310215828	0.0730136774174224
lrguk	0	0.00155654863358378	0	0	0	0	0	0	0	0	0.00362973398241408	0	0	0	0	0	0	0
col7a1l	0	0.00430435213043909	0	0	0	0	0	0	0	0.00105020394960701	0	0	0	0	0.00796923873846951	0	0	0
si:dkey-117n7.5	0	0	0	0	0	0	0	0	0	0	0	0	0.00273081906821723	0	0	0	0	0
copg2	0.155936436214063	0.683091822231854	0.394529844365218	0.331896587106423	0.402502187725042	0.414744312763222	0.0674036128336479	0.282954411109817	0.663068467275799	0.257631171186242	0.61625307328781	0.454134638864795	0.319290537304359	0.301276814649188	0.619907669441491	0.392822902284496	0.674694548883836	0.580269986541687
mest	0.0378967141880789	0.00652032019206917	0.00871465472626851	0.018514763085913	0.0237025800258358	0	0	0.354558108310842	0	0.0447278665995109	0.0274768532572024	0.0178054761875448	0.0271456726236085	0	0.102002418889183	0.0507870656047078	0.134060910114721	0.0348097142829229
CR749763.5	0.00548397157349955	0.0177000072104151	0.0241964060882636	0.0109966792338738	0	0.00820031735228153	0	0	0	0.0150069040683166	0.0217636717883488	0.000342703098793387	0.00510841330128655	0	0.0325516015295498	0.0207595124545432	0.0112784838108643	0
CR749763.4	0	0	0	0	0	0	0	0	0	0.000121657662539747	0	0	0	0	0	0	0	0
CR749763.3	0	0	0.000872150879311238	0.01193138254958	0	0	0	0	0	0	0	0	0.00649101967428063	0	0	0	0	0
CR749763.1	0.000223182368526862	0.00307614773457017	0.00117978564710535	0.00556211885580541	0.00618394770853818	0	0	0	0	0.00245682176880749	0.0109112620979767	0.000342703098793387	0	0.0286212295107773	0	0.000791888276600874	0	0
atp2b1a	2.1846156054192	6.8979135823165	0.74229512086684	0.619798169405244	0.546545234304551	2.1992258855632	0.631578507050855	0.9066403234644	0.466608811798521	1.90566127231133	5.11790705537976	0.491731054827689	0.693028360676081	0.849829337635685	2.12742103501631	1.05395089030802	0.41423067456613	0.557324582342162
si:dkeyp-38g8.5	0.01076248864806	0.0139131792531113	0.00456186941959979	0.0116368671095609	0	0	0	0.0912612740192303	0	0.00954221540770329	0.0120017785781978	0.011477245761259	0.0136652563203807	0	0	0.0127817742125149	0	0
kera	0	0	0.00172925084875955	0	0	0	0	0	0	0	0.000326774895819262	0.00159458336449441	0	0	0	0	0	0
lum	0	0	0	0	0	0	0.188058298072402	0	0	0	0	0	0	0	0	0.00372767680743865	0	0
dcn	0.000221316051028488	0	0	0.00492124046755722	0	0.0173975069372559	0.876552227903579	0	0	0	0	0.000932728104720742	0.0148550549498327	0	0	0.584620205057687	0	0
wu:fc23c09	0.00318206986934655	0	0	0.00269844572224844	0	0	0	0	0	0.00257968800252757	0.00143336657726571	0.000654938679728764	0.00506694703773609	0	0	0	0	0.061139412375439
btg1	6.64502083647195	10.135997768323	10.2736068632215	23.8115202262849	17.0369274617435	4.78539224690015	15.7751345754182	20.4393049194289	21.1605581711457	5.26688841838293	9.51704095370954	10.0211985788533	20.3750788665285	16.9416696246311	3.66203575921857	15.3317798415682	21.5241233474459	22.8362008175826
caprin2	0.00142403871334685	0	0	0	0	0	0	0	0	0.00140800544073896	0.00128981663966651	0	0	0	0	0	0	0
sinhcaf	0.19679771413197	0.423387535897652	0.129157596469356	0.319786634764939	0.202564295339837	0.144505918185732	0.6887145789722	0.440569503735837	0.178342591124988	0.102201393117777	0.279486398377413	0.099620988702108	0.179951206114766	0.220652400168295	0.0123795778844865	0.306845661353697	0.115399342765689	0.408639929469556
dennd5b	0.169217435206586	0.0357871981001635	0.0164471736411848	0.00521623919586457	0.0128510753137269	0.0377782680813884	0	0	0	0.0796298937758163	0.0150675392057886	0.0172976058802138	0	0	0.0144794971141793	0.0643872946664186	0	0
pkp2	0.265422765568448	0.4307242838182	0.0306070076052823	0.019864319353099	0	0.148754687977127	0.134807225667296	0	0	0.133183217682854	0.387165288147594	0.0215842492820741	0.0209195820299411	0.0361233830270672	0.0997040007810157	0.17395475010681	0.0259666069434707	0.0681923261265211
tcp11l2	0.0353599569676693	0.0369535522038596	0.0735619396828769	0.0753979612629386	0.028065278479716	0.111893378099463	0	0.167807759430796	0	0.0366542251189024	0.0759331021265225	0.0484981154703055	0.113244868459198	0	0.0121311425180883	0.131864580106641	0.0633972381945182	0.0388393255939504
BX649500.1	0.000197261742680855	0	0	0	0	0.00684643112661447	0	0	0	0	0	0	0	0	0.0147557916482219	0	0	0
STMP1	0.312245606389682	0.404485080214701	0.581123744750393	0.434761846825842	0.906983002304562	0.657416605461947	1.04635976801559	0.388877720779547	0.183764258932776	0.421360390698343	0.500681918083858	0.596050680132776	0.569862495453842	0.572806998123267	0.557526732185128	0.72311462893627	0.69712965175382	0.398239536547647
golt1ba	0.00071861782004374	0.0611705069572598	0.00837891137441882	0.00335894190642794	0.00399147421108512	0	0.188058298072402	0	0	0.00539650549596934	0.0499790221386496	0.0161096755162907	0.0260603753132766	0.0176431254443862	0.00768447543849538	0.040590139080841	0.0363288725439848	0.0345621534502946
spx	0	0	0	0.0029325943195648	0	0	0	0	0	0	0	0	0.0152779151495163	0.0252818291909056	0	0	0	0
kiss2	0	0.00198952712919193	0	0	0	0	0	0	0	0.00134966463533141	0.00651580378844066	0	0.00534155220165428	0	0	0	0	0
ldhba	0.139493748339387	1.66815111854614	1.59818806073818	1.39091777874716	1.36201646147534	1.85814173410234	1.26272314694507	1.76730968664364	1.44485853810299	0.245116409113306	1.77197348471686	2.34141113967352	2.14754046804059	2.35845015770049	1.66191373293753	1.66656301187304	2.5813512528242	0.888896368187275
slc25a3a	0	0	0.00165795604194828	0	0	0	0	0	0	0.000632868453482144	0	0	0	0	0	0	0	0
tmpoa	0.0100352379298422	0.0437635850001255	0.0784082187849143	0.0154703575853621	0.0489550780809273	0	0.310655483069276	0.0661375661375661	0	0.0300858661128513	0.0408631761336895	0.0641126316662384	0.0110253587266156	0.102324427826866	0.0182116202211747	0.0393846653742756	0.0943695990932703	0.0278427441808665
strap	0.0700269886651349	0.20625103928163	0.198745360833195	0.254082711305665	0.36433148947783	0.423235128116229	0.188058298072402	0.627688593774002	0.0816546498240342	0.120513010130843	0.24000524001649	0.247281960908283	0.303869015469271	0.276359474404179	0.597612328782669	0.136508847076425	0.444592660589275	0.0796892791309441
etnk1	0.140515624052391	0.409997830443693	1.15752578219245	0.595560201971278	0.244539668111904	0.223559508472427	0.568712579384213	0.76137352909778	0.455383288748885	0.0864340128664934	0.48017218756473	0.612916539518483	0.456307842032069	0.61070521539368	0.224843703452922	0.335448105007832	0.762310125278751	0.46553233507132
sox5	0.0791009947803806	0.0626219558137816	0.0054327025331877	0.0201681248561677	0.22622763014297	0	0.310655483069276	0	0	0.051153319456436	0.0735519531464224	0.00606964498650784	0.0156289798663038	0.0692094169049466	0	0.115081854140205	0	0.0021316843759899
BX547928.1	0	0	0	0	0	0.0819202097157369	0	0	0	0	0	0	0	0	0	0.00596422419757328	0	0
casc1	0	0	0	0	0	0	0	0	0	0	0.00192537422783712	0	0	0	0	0	0	0
lrmp	0.00129312156312535	0.0688235424136262	0.0344261605264289	0	0.078831829176522	0.367600355404376	0	0	0.060084960133629	0.00861018206609369	0.185300000240991	0.0210022135057078	0.028981875044851	0.0201986333604668	0.450948521402555	0	0.00454120851549256	0
bcat1	0.00261923682772703	0	0.0273561106231127	0.00260848493195637	0.0513694869133503	0.0324203647159827	0	0	0	0.00858156915316188	0.00483884167184382	0.0432171737345241	0.00403318740454763	0.0366164228318043	0.00606170818936776	0.00138029654290928	0	0
igf1	0	0	0	0	0	0	0	0	0	2.39852461186547e-05	0	0.00141007944528603	0	0	0	0.00306760510842143	0	0
nup37	0.0154407416441718	0.0359180776960235	0.117154712810025	0.0176586343140969	0.0259900443040291	0.0261188866914504	0	0	0	0.0300899135845406	0.0772546658888881	0.205095720939565	0.0597061804636613	0.0217521344281908	0.0528637493936777	0.0440947214760947	0.098564392710344	0.0348122748080973
parpbp	0.00775516484420895	0.00547563411265296	0.0234885356152419	0.00209212155142529	0	0	0	0	0	0.00397350635979263	0.00751211048561172	0.0235649399963931	0.00197468454414407	0	0	0.016866597576937	0	0
th2	0	0	0.00196574029189671	0	0	0	0	0	0	0	0	0	0	0	0	0	0	0
pah	0.0034759567022748	0	0	0	0	0	0	0	0	0	0	0	0	0	0	0	0	0
ascl1a	0.00158445033120557	0.0807969333700309	0.00647969962879791	0.00659418340270414	0.0223393798588151	0	0	0	0	0.0141732309872324	0.0792594302803139	0.00288261695497641	0.00203900826715902	0	0	0	0.0142770460791662	0.0021316843759899
recql	0.0163663741121141	0.028758229021816	0.0168787643423786	0.0458983673929397	0.0227842333105491	0.0510928936970598	0	0	0	0.0111596364309297	0.0262082722668922	0.0133922941491416	0.0192087801041556	0	0.00714043449543905	0.018607197210265	0	0
itfg2	0.0203521458843949	0.0128595289369264	0.024545567671356	0.0257907394165218	0	0.0169244123860835	0	0	0	0.0139767489462157	0.0467069951830061	0.0346997235098585	0	0	0.0125374721874661	0.0295201647153815	0.0425641200412794	0
nrip2	0	0	0.0251374859987613	0.232446092103302	0	0	0	0	0	0.00316081433085135	0	0.00632121467087057	0.147701575760768	0	0.0193680798462111	0	0.0247877548491045	0
klhl42	0.0045089930029934	0.00765379397947914	0.000872150879311238	0.00898389889998251	0	0	0	0	0	0.00223453233449815	0.0207016787584677	0.00249818912005748	0.00611980122885609	0	0	0.00586765329254393	0	0
cwf19l1	0.0138208067486597	0.0348312967162646	0.0330104477344206	0.0284183483469529	0.0304053026847882	0.0815124033266071	0	0.170270209963265	0	0.0202973809038147	0.0286438898660313	0.0237180209632449	0.0422902368550112	0.0759978561338389	0.0182116202211747	0.00311451446612088	0.0255770499853052	0.0180458834632938
washc3	0.041481126055993	0.0615084618157746	0.175259227990233	0.0436358867364178	0.240835935941081	0.0271584792991795	0.0674036128336479	0	0.0527339939144971	0.0476109013002028	0.0631184923742132	0.167320470868934	0.0296254089894428	0.0961524992933914	0.143438712563815	0.0423725313707547	0.0350638672899797	0.0180458834632938
dram1	0.0187172281746307	0.0493871361890957	0.839937465690151	0.0489798683552566	0.813001516643311	0.104579736346105	0.366501740883269	0	0.0661222600588488	0.0159288998056228	0.0368454988096154	0.83109495792819	0.0296169429231002	0.368426891014402	0.0703570256317005	0.0901992442637493	0	0.0369262745131154
gnptab	0.204472888117744	0.215347111782334	0.417416904446433	0.0375826337956652	0.125921749690002	0.355808166605864	0.310655483069276	0.0627321088025695	0.0630859103927729	0.327132117180667	0.253571161986698	0.50726936754403	0.105366808483701	0.257416170614111	0.185613685035357	0.124548983925546	0.126603938019939	0.106114705627193
chpt1	0.715551095656654	0.263105944507234	0.149219732203707	0.0903962180189312	0.25049653595703	0.270069616113784	0	0.144375144375144	0.173979609589756	0.745912986723955	0.13510707962094	0.096924730893328	0.114624841454795	0.290907359536421	0.364097483627119	0.100251891526611	0.176803669573094	0.1546585040552
mybpc1	0.00093562121412571	0	0.00791514333137302	0	0	0	0	0	0	0	0	0	0	0	0	0	0	0
CT868708.1	0.0111049492817728	0.0193560335561067	0.0144556475466613	0.00727136818790961	0	0	0	0	0	0.00831820280824315	0.0215637072347242	0.0174739496038208	0.0217791513862423	0	0.10502424430001	0.00306760510842143	0.022434177176541	0.0417641162712997
spi2	0.00440628990688977	0.00336512130969187	0.00359491816702625	0.00659418340270414	0	3.3341288669675	0.0674036128336479	0	0	0.0130218428174874	0.0241794796285768	0.0242011618596825	0.00625354883326138	0	1.65496033845859	0	0	0
spic	0.00762453374574211	0.0156077134513728	0.00180083065114615	0.00618259426601477	0	1.20752966365762	0	0	0	0.00707841055172835	0.00279269201062781	0.00900079932717446	0.0151979176610648	0	0.960840892366353	0.00239610259536249	0	0
dnajb9b	0.0519756672018133	0.236957131925463	0.233113554699556	0.466807076169224	0.743574108440536	0.355804560316447	0.134807225667296	0.149780464224989	1.04849857777979	0.0978531764982735	0.316496995894904	0.24297935166554	0.50743507431749	0.4716121370124	0.450485282938147	0.468142878653705	0.622941847976708	0.954906388495778
avpr2l	0	0	0	0	0	0	0	0	0	0	0	0.00208815043536892	0	0	0	0	0	0
apaf1	0.133105648630343	0.128130878965515	0.134488353939745	0.180714112244816	0.304478950458302	0.13767616725653	0	0.370919781326971	0.10439830039567	0.137199458822127	0.187212531585254	0.143788213627396	0.190265656173915	0.166906767418195	0.285446841086874	0.083358259690453	0.249359478851445	0.172710723788981
anks1b	0.00195531869981089	0.0218020716240378	0.115557053413182	0.0498816059874379	0	0	0	1.27719985756961	0.654145891198272	0.00498547276767997	0.0125905485022294	0.114106999300791	0.0239642159747043	0	0.00799888015677805	0.0600952480914029	0.658813243832066	0.384797420502803
uhrf1bp1l	0.236144832412469	0.188242196637741	0.138187622011042	0.0691889553604225	0.141606139313192	0.128517125734484	0.134807225667296	0.142264381086087	0	0.269063000364156	0.152975892519702	0.0762364516066386	0.0827957173693657	0.0902223056534606	0.126170259793813	0.190345189035403	0.070306483840264	0.138220947427186
plxnc1	0.00623995993134639	0.0200477234473239	0.977420517874689	0.20474704007978	1.24089880283015	0.415217930709134	0	0.667712426397462	0.060084960133629	0.0129526524421611	0.0276177955609756	0.499444043902727	0.124642652622816	1.06784182946039	0.559206972109226	0.0437941706227041	0.771646074366762	0.0879711623649555
cradd	0.00304879192954712	0.00512196782702061	0.00280412412779963	0	0.0181082329080917	0	0	0	0	0.000378979102072501	0.00651156955203712	0.0120314871424578	0.0019760736996447	0	0.00797352788741379	0.0118094428304873	0	0
BX649398.3	0.00974418693889018	0.0306110678117622	0.0113951992723373	0.00392951549466902	0.0123737108140046	0.00930934006088308	0	0	0	0.00476874105865169	0.0177201349563461	0.00296197934683475	0.00151397359781443	0.0259144563794913	0	0.0134242596489072	0	0
SOCS2	0.00369533554786847	0	0	0	0	0	0	0	0	0.00908142620180907	0.0231781136069586	0	0	0	0	0.00150150215656284	0	0
ncaph2	0.016952859653509	0.0464939564763405	0.115964052770436	0.0298690277255821	0	0.0113380613048975	0	0	0	0.0265333863147252	0.0607510977217643	0.101561883138921	0.0371176750940952	0	0	0.0299966701406351	0.00900509057770358	0.0210262933798715
sco2	0.013088701196852	0.0201549118702544	0.0239674717206793	0.0453499214246652	0	0.0384759470325095	0	0.0899127456209955	0	0.0224641400315347	0.0086852299763933	0.0200844024603806	0.0575777705125563	0.020746070175657	0.00888355875363671	0.00570221569542901	0.107515784716062	0.0205716025484101
BX649398.4	0.00194075458479011	0	0	0	0	0	0	0	0	0	0	0	0	0	0	0	0	0
si:dkey-202b22.6	0.0079735964386019	0.0160381560507135	0	0	0.0265681872525838	0	0	0	0	0.00606825881080749	0.00140885526135676	0	0	0	0	0	0	0
rint1	0.011616396345161	0.0490786474519475	0.0230898651707034	0	0.0041581338295373	0	0	0	0	0.0130612554398431	0.0264933137377655	0.0138639670137471	0.00190973996025831	0	0	0.0174709399128269	0.0131216031449858	0
cdkn1ba	0.0906806913837422	0.280353675643861	0.353891707230622	0.354527807239598	0.379186952967186	0.0437724221328053	0.310655483069276	0.530245869291892	0.351829183037291	0.128426857197366	0.357504302109049	0.424469901978607	0.276001862122239	0.169918170018647	0.0851084954809607	0.314685855675269	0.370235228620494	0.50066784566131
CDPF1	0.217595071156872	0.308689068704053	0.222715197632647	0.403343217934885	0.469955379419116	0.237052971110032	0.134807225667296	0.520958706526395	0.529097855557391	0.288609959393954	0.367175754837392	0.172917811416368	0.37131647219549	0.380220033331231	0.336742217312725	0.25953395636247	0.793287899082835	0.242982590258806
pparaa	0.0397978488200792	0.0103064581638333	0.0167464916100077	0	0	0.020399147026672	0	0	0	0.0360703348564283	0.0251521755885496	0.00111959159364896	0.00452151108900595	0.0252818291909056	0.0061122826319489	0	0	0.0021316843759899
dre-let-7a-3	0.00105868917552781	0	0	0	0	0	0	0	0	0	0	0	0	0	0	0	0	0
wnt7ba	0.000338582054920853	0	0	0	0	0.00895599917604808	0	0	0	0	0.00642099858677102	0	0	0	0	0	0	0
atxn10	0.000445526405020479	0	0.000700348822738141	0.00151299755681155	0	0.00690202574455603	0	0	0	0.000121657662539747	0.0014136578117431	0.000413401654846824	0.00297641193541186	0	0	0	0	0
def6c	0.0620399522298479	0.0357805943646849	0.0232277503172851	0	0.00399147421108512	0.0920537249744962	0	0	0.328760064249332	0.0495031366410366	0.032410598566091	0.0188992329071944	0.0286682065984168	0.0668061624249806	0.0494405467131745	0.018817984317939	0	0.280487895758767
slc26a4	0.00277741364122019	0	0	0	0	0	0	0	0	0.00136050275474598	0	0	0	0	0	0	0	0
slc26a3.2	1.27776937186417	0.122724874625887	0.0431400991615185	0.0887774947550939	0.131590989808615	0.0965097060653839	0	0	0.0570528766060385	0.517668633904374	0.0637918011469925	0.0135771926824283	0.0356143662858132	0.0107228831688264	0.0463284688441047	0.0998276357252978	0.0108718223022388	0.062209119181252
slc26a3.1	0.0014779931985709	0	0	0	0	0	0.0674036128336479	0	0	0.000225587180873095	0.0046752916446928	0	0	0	0	0.0286912823571009	0	0
cbll1	0.0135790602187039	0.0309032370338925	0.0361460171819371	0.0148887502174808	0.0791653952388504	0.0398892963769527	0	0.263000469807599	0	0.0195435052886784	0.0554511908287062	0.024056410618066	0.0339689479092044	0.0114387290199411	0.0408486038249078	0.0159322304911058	0.0743603408729444	0
bik	0.451883048601729	4.17322202236589	0.307945613772121	0.308112093119464	0.385670270032939	3.50540178737874	0.269614451334592	0.428074394650234	0.619048644423628	0.771054510989475	4.61082819748141	0.494120355057568	0.63256719956589	0.808467914847502	2.88023694334084	0.86297886803843	0.397193607384711	0.575414534853461
mcat.1	0.0151858127616265	0.022606693043845	0.0186673161718794	0.010711842133047	0	0	0	0.0496978371501272	0	0.00931520361456306	0.00689006857683614	0.0200582733255479	0.00376476966198016	0	0	0.00258593581914172	0	0
rap1b	0.28589054339588	1.05296764818441	2.74066778542471	1.67429990191621	3.19164200627431	2.13554168507327	0.390269136573346	2.25750246314111	4.05316104919367	0.341127090452415	1.14957563560076	2.54362477034629	1.42712871178686	2.95497983860901	1.6803967004622	1.26668750244059	3.83760271332617	3.51693017971752
si:dkey-31f5.8	0.0578826260308877	0.394840515701676	0.3021331847482	0.052259894135171	0.0493157477063816	0.0616465664661967	0	0	0	0.193463700975634	0.603992555864854	0.257640078801842	0.0491344373163208	0.161976731902438	0.223532748349036	0.976099980376352	0.128023477090473	0.120759540955709
impdh1b	0.0291513100180584	0.121985743576759	0.235442737874655	0.600266800826363	0.0875331808153856	0.0603201316287489	0	0.156015921494022	0.172277798790465	0.0365966466573523	0.0997850075507161	0.2045893393247	0.694779164759633	0.0201986333604668	0.20371012816506	0.0949242661133127	0.488601215635738	0.0785542192471416
si:dkey-31f5.11	0	0	0	0	0	0	0	0	0	0.000887712846909303	0.0107559471916294	0	0	0	0	0.0042355795458781	0	0
lepb	0.00114314438782408	0	0.000910372630994201	0	0.0189118142103372	0	0	0	0	0	0.00152351097369719	0.000781250244140701	0	0	0	0.0232652823823649	0	0
snd1	0.442964949394906	0.787367694700419	0.869564928288429	0.437062899174951	0.326989168272899	0.351369285535062	0.376116596144805	0.98615680753785	0.88387371964562	0.498213011689877	0.871702949550676	1.15205199468176	0.612764427229792	0.312458538458412	0.674848251190251	0.458879918140719	1.24509774167691	0.459678435980638
lrrc4.1	0	0	0.00219754428820881	0	0	0	0	0	0	0	0.00089480045770833	0	0	0	0	0.0411304833781236	0	0
pax4	0	0.0162065342970227	0	0	0	0	0	0	0	0.000891286906768174	0.0184737291211682	0	0	0	0.0538938291565616	0	0	0
hgfa	0	0	0	0	0	0	0.188058298072402	0	0	0	0	0	0	0	0	0.0138609764141402	0	0
cacna2d1a	0.00285181971707868	0	0	0	0	0.0680161285322311	0	0	0	0	0.016997075717903	0.0015191773350895	0	0	0.0449690837549185	0.0488095876264304	0	0
BX323820.1	0	0	0	0	0	0	0	0	0	0	0	0.000639152963813013	0	0	0	0	0	0
drd4-rs	0	0	0	0	0	0	0	0	0	0	0.000718671458193013	0	0	0	0	0	0	0
BX855618.1	0	0	0.00206572133749673	0	0	0	0	0	0	0.00079656185013824	0	0.00141718615987334	0	0	0	1.70978215172149	0	0
zgc:193726	9.58189377755938e-05	0.00577630674499339	0	0	0	0.0757931574066869	0	0	0	0.0105874526056708	0.0133276964471678	0.0199751908017857	0.0219518730833551	0	0	5.63758829687449	0	0.0289061619265379
atp6v1f	0.0320070381489526	0.117183040843119	1.04674874981008	0.175311343673718	0.921031657735972	0.585633321671985	0	0.308871017552447	0.132031695089817	0.0832987025612358	0.165917638884712	1.26847015853645	0.199211387675893	0.77468632741858	0.71012006942078	0.142734034560416	0.331924937751994	0.208915232343476
lamtor4	0.0605704833674516	0.181275949819807	0.550952048980622	0.227941061040818	0.525553363759621	0.421611903811133	0.134807225667296	0.214905212980493	0.217363936170464	0.104315017143698	0.203471724156716	0.902260452763103	0.258630312591428	0.537507059961211	0.481648587753192	0.321939051835631	0.316960798462452	0.266746986383827
gcc1	0.0323566119007946	0.0344402293955311	0.053452002123245	0.08182789648009	0.0360877559534552	0.0201989213851948	0	0.0427745269137323	0	0.0360951483501324	0.0584900232805565	0.0336058726721892	0.0360928635956638	0.0264101013355588	0.0727097842223213	0.00574938877960415	0.0648546491162111	0.0862683145103927
dennd6b	0.000631966202953039	0.00954044676357611	0.00326833766365877	0.0208449330294225	0	0	0	0	0	0.000670824346523171	0.0142319413112836	0.001364642091318	0.0157588480214175	0	0	0	0	0
ppp6r2a	0.0929742187527887	0.174268088420957	0.18335207441196	0.247050115982677	0.321375117634564	0.265841981751882	0.0674036128336479	0.473657106011515	0.178342591124988	0.0736795651131506	0.1565815897877	0.153491247843598	0.227481973768069	0.283213249820946	0.236586613908023	0.160403485105491	0.307346085402157	0.0639004623742072
fam3c	0.123522247980439	0.685046964737341	0.104678143262807	0.110733022955885	0.0650491940064805	0.376045109574437	0.134807225667296	0.068927488282327	0.05780848050409	0.143757608060685	1.01695044380641	0.120631413345681	0.183315713931108	0.297605001750591	0.402954428999218	0.657464753341937	0.292516032366074	0.286049356697885
cep83	0.0144928846810531	0.0153302144384834	0.02813951140909	0.0267926774039566	0.0111213056412823	0.0172644608960518	0	0.0496978371501272	0	0.0140129965059118	0.0241977266061307	0.0193243866552953	0.0313286400332871	0	0.0585959840375767	0.0416828554654139	0.0155113791477428	0
lrrc17	0	0	0	0	0	0.0237923842523038	0.0674036128336479	0	0	0	0	0	0	0	0.0602144307194934	0.0943054304478503	0	0
sinup	0	0	0.0146705097524295	0	0	0.0173975069372559	0.366501740883269	0	0.0695778018980824	0.00019319723180824	0.0062756359729495	0.0514750310731899	0.00334453194111617	0	0	0.0500325376751393	0	0
ccdc146	0	0	0.0288999914756169	0	0	0	0	0	0	0	0.000832679679784702	0.015239867110187	0	0	0	0.0134226746558426	0	0.034662525650269
fgl2a	0.00818158901224525	0.0215406819402566	1.63442011757455	0.00877393550184126	0.0338793556146562	0.0136928622532289	1.65406526160548	0	0	0.0239202295793304	0.0461333533364237	2.39233062739612	0.0170339651875565	0.0256595136495783	0	0.930795849623319	0	0.0266562174294343
gsap	0.00345294779619425	0.0156098375301112	0.00421304297852163	0.0187042772106879	0	0.0340286197796369	0	0	0	0.0117236170815652	0.0226614150514173	0.0146593443106433	0.00835156215911676	0	0.0422609614368727	0.00961949762571693	0	0
stk38l	0.00263885371111359	0.00451966453902598	0.00674694691318404	0	0	0	0	0.0427745269137323	0	0.00110633736809649	0.0287578606981838	0.0249263610073891	0	0	0	0.0185023605107266	0	0.0208280829207637
cacna2d4a	0.00120473030124402	0	0	0	0	0	0	0	0	0.00277741979922588	0.00879004704461272	0.00318510999299594	0	0	0	0	0	0
lrtm2a	0	0.00295296983248264	0	0	0	0	0	0	0	0.00105578604538022	0.00977470661378418	0	0	0	0	0	0	0
cacna2d4a.1	0	0.0114629813819096	0	0	0	0	0	0	0	0	0.0118390404395949	0	0	0	0	0	0	0
dcp1b	0.0419946342564755	0.049962095050496	0.0656822456371882	0.061522527806586	0.0950898553632454	0.0721101550876129	0	0.0219900077404827	0	0.0329022722427589	0.0647104413458252	0.0562348180011106	0.0746461372813916	0.119177207957389	0.0140310774136544	0.0189550490551715	0.199308535432812	0.0229597672967536
cacna1c	0.00353728385594607	0.0175623463294696	0.00250101040820491	0	0	0	0	0	0	0.0159469468699243	0.0252978742426519	0.00192186854822723	0	0	0	0.00671133732792131	0	0
napepld	0.0665785331814527	0.0486870592734338	0.0265099883171866	0.0255094509431238	0.0973273095850068	0.0960810929471771	0	0	0	0.0929895277593419	0.0523320682855705	0.0222515529040874	0.0296433789996715	0.0256595136495783	0.0812129627210417	0.0714987570665188	0.0587857011117806	0.0229597672967536
ints13	0.0530570544192158	0.0552444301953886	0.0794814057334948	0.0855871053179047	0.143282380235382	0.057529395013827	0.0674036128336479	0.0888814295845454	0.0570528766060385	0.0727424233837348	0.133131858251879	0.0735266767687531	0.0882275551335048	0.160119210788132	0.0832841597897001	0.0521946167785771	0.194822465315418	0
rassf8b	0	0	0	0	0	0	0	0	0	0	0	0	0.0021438570990612	0	0	0.0311372461435722	0	0
BX248410.4	0.00234388957264232	0.00193648709621823	0	0	0	0	0	0	0	0.0046901617492342	0.0460893158496502	0.000412623336209868	0.00721044325990123	0	0	0	0	0
zmp:0000000650	0.0103589685737605	0.0188686863958599	0.00119834719161943	0	0	0.0273646346312111	0	0	0.105467987828994	0.0339448421955215	0.0886353058905192	0.00346503828347547	0.00558863718287977	0.0486936259784548	0.137362701028861	0.00949133880602039	0	0.0999551596177887
BX248410.3	0	0	0.00938007526631856	0	0.0252247861277314	0.146615614877356	0	0	0.10439830039567	0.00574039765537392	0	0.0120993073384626	0	0.0680785498022543	0.00797352788741379	0	0	0
BX248410.1	0.00888569188472994	0.0103266313495875	0	0	0.0940799030299347	0.030573766907295	0	0	0.124290664778094	0.00971712600399072	0.00294106229506103	0.00318388941355476	0	0.447881884981035	0.00606943432872056	0.00507878984983949	0	0
BX248410.2	0.00244393020100614	0.00117167910989881	0.00602572446034826	0	0.258846794198357	1.06971469281566	0	0	0.252618509104537	0.00604636678418696	0.00149113520398834	0.00263775891109203	0	0.10046397199772	0.86370256315896	0	0	0.0330405936733871
nav3	0.0118872299450587	0.124562479118776	0.227731512267898	0.00972046348668727	0	0.281447053049912	0	0	0.449066716842318	0.0359489276405996	0.0458831139102111	0.141819529804946	0.0119706775113622	0.0217521344281908	0.202120424621287	0.237908484245066	0.0152307148688331	0.0570138446821795
syt1a	0.0029102154169302	0.193335337018183	0.0132519662604939	0.00473119256332228	0	0	0	0	0	0.00466835096903245	0.257741597931522	0.00555490630493312	0	0	0	0	0	0
pawr	0.498956911654273	0.5506421490416	0.16084424410249	0.0580862622983806	0.0440501893029484	0.567475488822285	0.749856825374854	0.0879229091932194	0.511707034342437	0.465429338454677	0.539662975769802	0.532349118818098	0.0578471805805026	0.127096836303127	0.752147502103367	0.945250399568354	0.0474615572327866	0.236836645844509
ppp1r12a	0.477908298986868	0.457125423760329	0.601765206313673	0.382550457101967	1.08621335263358	0.591048925833634	0	0.418635425088257	0.912812125768308	0.332679862366955	0.485064252563609	0.550243092788264	0.35803412306905	1.03517161064469	0.590527710912243	0.500454914093607	0.670955687137791	0.571640265269522
rps16	10.6127787808788	22.8264293356256	21.9393059224789	26.19780855885	13.2185510873835	19.5377620869221	27.6729177209911	16.6411277908051	23.9731399701331	8.88472539383234	18.3873351642671	26.6007840440638	28.7642118415589	13.2237591102526	17.199671139297	25.2629634428246	20.8730344839596	27.555974945032
myf5	0	0	0	0	0	0	0	0	0	0	0.000832679679784702	0	0	0	0	0	0	0
lin7a	0	0	0	0	0	0	0	0	0	0.00185578887358069	0.00134325502876291	0.00118911111922349	0	0	0	0.125677830287839	0	0
acss3	0.0381980351959761	0.0541832996152101	0.0150515402143688	0.00352421913876542	0.0655182624175352	0.0130677103411326	0	0	0	0.0701903019268324	0.0673495837999686	0.0584542342222095	0.0130285791010156	0	0.0329788111138593	0.0603264553338981	0.0570238421051772	0
ppfia2	0.000358759967697253	0.0119371627751516	0	0	0	0.00922394351256993	0	0	0	0.00473850318426484	0.00753773331498817	0.00110795700373415	0	0	0.0193627004202513	0.0127817742125149	0.021373275710982	0
BX537308.1	0.00290546996936813	0.005569293145314	0	0	0	0	0	0	0	0.000801656207544792	0.00758199442709231	0.00284958756244104	0.0068558023623408	0	0	0	0	0
BX537162.1	0.00382998740739452	0.0408793794441292	0.013778869453946	0.0376892399461754	0	0.0111474642305742	0	0	0	0.000656153168196203	0.0137472871154546	0.00718368172557084	0	0	0	0	0.0150335021595626	0
llph	0.0866415884951235	0.111919429526422	0.106241470847621	0.175994940471424	0.0434922139436561	0.0183103454319626	0	0.315083586435505	0.12254241099523	0.175222544559721	0.148781501563065	0.156482697061671	0.253980827309288	0.0300822448574402	0.10012372929935	0.18338720751359	0.263673177915267	0.243261286942577
hcls1	0.151878541665546	0.16976286148041	2.21431507451537	1.38648313307999	1.83989228106129	2.46827288770656	0.568712579384213	3.06516135015418	0.521422723983425	0.100685594840648	0.0715723485425176	1.25500571787359	0.92466948064605	2.24584332575373	1.7387053773249	0.257593906243758	1.57272030801413	0.660152168309348
golgb1	0.622712213081079	2.87834966302821	0.807735612811129	0.895355319539575	1.14698979090851	1.25140101341207	1.64143492849876	1.2720038203476	0.710919268324049	0.753146082372993	2.09226407159805	0.667026977939981	0.875910955175886	0.752260718217683	1.30378002132222	0.731767694843021	1.46733527981079	1.00981537625805
guca1a	0.000261268756614672	0	0	0	0	0	0	0	0	0.00195808672022709	0.00567262354995886	0	0	0	0	0	0	0
orc5	0.00368973281731439	0.00202253510993337	0.0180444462749001	0.00533867595546042	0	0	0	0.0219900077404827	0	0.0230620850985516	0.0184602270627727	0.0373532554426316	0.0279591989052908	0	0	0.00297341528951992	0.0225657681955595	0
lhfpl3	0	0	0	0.00548188811575994	0	0	0	0	0	0	0.00959903470122388	0.000643652485843829	0.00279675296980206	0	0	0	0	0
kmt2e	0.155291366895445	0.302354047182789	0.355036003600889	0.382646819700665	0.23450864471229	0.350038504214987	0	0.244980999618174	0.160384890699459	0.249944462912216	0.463589581446924	0.296064957067965	0.344175101307693	0.215528526038214	0.350898811155092	0.257307497426031	0.217908357077289	0.179116414669089
ndufb2	0.789430314940304	0.756766121035721	1.34764009518817	0.736966247657323	0.991406955274828	0.817893576519713	0.803107897779961	0.796708051888839	1.10771773899818	1.08652952332381	1.19212852703929	1.65806963451213	0.856938727037241	1.03205385144011	0.750217583465088	0.873441820236425	0.774024000987189	0.980878489113289
kdm7aa	0.372973730323096	0.310011070138685	0.948683871304916	0.590585085795587	1.70956447095515	0.645697944751487	0	0.28707712260263	0.292800218836445	0.249169083509079	0.236700865316687	0.960199286216381	0.402744051670627	1.34265561340535	0.473512628698239	0.334141919743967	0.129542454459787	0.434122343951398
BX537168.1	0	0	0.00270074867454007	0	0	0	0	0	0	0	0	0	0	0	0	0	0	0
sema3c	0.00160855745832473	0	0	0	0	0	0	0	0	0	0	0	0	0	0	0.0235019061723431	0	0
cd36	5.33066242753204	0.523097665559438	0.366152364808701	0.407645296776704	0.301684373352966	0.350441687547896	0.874830377286484	0.391354226901625	1.08218244987759	3.56507366227009	0.32533658192027	0.129050961934457	0.176669108763173	0.0957636731815025	0.165358821992256	0.142873495980067	0.263455963392188	0.557868520144628
gnai1	0.0931929569414763	0.337523082248666	1.09474107480966	1.65718686499196	4.99407773584922	0.207794468867659	0	1.87670495737639	4.95562081100756	0.091640845092844	0.429274691689154	1.36692007615376	1.69192012832254	4.06697820400718	0.326275019207586	0.469909202330681	0.844858074018837	4.7164332332705
nup107	0.0501358386158726	0.0850247155987268	0.0862159681258195	0.0936164032815359	0.0314646232734922	0.173932618903051	0.29218407596786	0.128075954394234	0	0.0510150465820312	0.146923656343225	0.125131594606964	0.0750004625068187	0.0849810022320659	0.0387565695356374	0.0873805669198416	0.161849100967721	0.0713948013491569
magi2a	0	0.00303480005219856	0.00153879273400537	0	0	0	0	0	0	0	0.00455700863370856	0.00100210224173503	0	0	0	0.00487280991558344	0	0
slc35e3	0.00262488020203272	0.00962862397334797	0.00111740220970757	0	0	0.0154650335591228	0	0	0	0.00471037086556556	0.00522037306965784	0.000928428211888115	0	0	0	0.000578518497434733	0	0.0537622846820499
AL935183.1	0.0012714852397093	0.0112165466496175	0	0	0.0432647586908084	0	0	0	0	0.00109846847131855	0	0.000814868481449397	0	0	0	0	0	0
mdm2	0.0378484573133961	0.166726036986243	0.135146296911594	0.104608113688483	0.183291972656079	0.0801541664336188	0	0.242580121974517	0.05780848050409	0.0554301996611115	0.149986769180998	0.115258323070136	0.124148606155929	0.113938667305766	0.044126748108346	0.160157776505865	0.324631254292605	0.0781492558326385
trhde.2	0	0	0	0	0	0	0	0	0	0	0.00237002318830687	0	0	0	0	0	0	0
cpm	0.008888376042704	0.00825529682490643	0.0349448964807505	0.0812015111936083	0.0295849235229727	0.0180513844169115	0.310655483069276	0	0	0.0077065950061745	0.0313013377683232	0.020098650701322	0.0311975184167575	0.0596238671573322	0.161804707372525	0.0558983004057137	0	0
usp6nl	0.0696697720423572	0.207335395995516	0.289018067542194	0.0354987716765588	1.54937283583357	2.14616840162394	0	0	0.472607148454288	0.0612086755761771	0.1988567935577	0.23771621212265	0.0377702747104688	0.732018782572594	1.98821387675608	0.133613907768427	0	0.0736232961673672
celf2	0.0531474740608276	0.0981599040886608	1.10299375835608	1.61786137247033	1.61376001180356	0.687927822895941	0.366501740883269	0.26568576836231	1.00194749612561	0.0142791828401536	0.072895802563841	0.946607335509806	1.00535314687675	0.929903268421999	1.17679032571925	0.156936960276099	0.31402151503899	0.583948182951916
gata3	0.0182387628205707	0.0683015963657883	0.167090321531979	0.560386985599971	0	0	0	11.6489153755082	12.165846340622	0.0306232633388086	0.00492336454361327	0.142494380695259	1.4214737063992	0.0145305963502048	0	0.367629328859054	9.86776488638857	16.5298270028362
taf3	0.27587569731239	0.486988433920871	0.471975229197637	0.581457386425016	0.723970210367129	0.324591391789196	0.498713781141679	0.766537920086834	0.0962667744854541	0.30604354657536	0.616836128801347	0.428416624375805	0.509798331411386	0.568139002131706	0.233539559041736	0.308613356337342	0.790054765143597	0.149890096252984
atp5f1c	1.52028692823641	1.1522073458017	1.38867647627457	0.703472823821728	0.725662715342772	1.46104509597237	1.68679482690632	0.637254746896935	0.633354146663684	1.82114199148197	1.55481648555136	1.86539364106162	0.876643341908366	1.20285601891714	1.80646517671874	1.77528952020499	0.963863595977141	0.323224940556471
kin	0.046214263680216	0.0783973941549256	0.149045554580334	0.112484341746152	0.229228706634086	0.0756120667224831	0	0.218793195217557	0	0.0535343583903013	0.0864186004433321	0.112060755538885	0.0869200465897942	0.217945777096834	0.113234442936682	0.112910201887425	0.0621029215572467	0.167859174464459
itih2	0.00355035229948626	0	0	0	0	0	0	0	0	0	0	0	0	0	0	0	0	0
itih5	0	0	0.00107860762972522	0	0	0	0.366501740883269	0	0	0	0	0.000473385733346929	0	0	0	0.00781167001006143	0	0
tmem110l	0.00158832113820363	0.0233069916530912	0.0211000171924588	0.100679171265026	0.0220193446149739	0	0	0.0885959316748175	0.0920522120146547	0.00581997409876516	0.0404347792976733	0.0530202050527586	0.0746534066300592	0.0525933795453828	0	0.0597794980155533	0.0077213041591577	0
sfmbt2	0.012244310472699	0.0625057414569765	0.209358456277619	0.0531686286462892	0.102366560980993	0.043845225949346	0	0.210432133887861	0	0.00533564703318446	0.0624424272322468	0.0993627953221075	0.0294274173769403	0.0529608803671527	0.0450107585720821	0.00406418960066358	0.0698030410597629	0.069410993137881
prkcq	0.023247484085961	0.0823053142742719	0.529010955967452	0.11629446261455	0.069507103032636	0.0244618776421519	0	0.443455381819282	0.48796088401286	0.0301940145052481	0.0667232095822868	0.284980198938258	0.0575312843625555	0.0995422025950219	0.0189414455626848	0.0591722115341851	0.123014545573557	0.233961186299852
pfkfb3	5.45438594695916	2.55213329620594	1.68283652945031	0.760662707827801	0.826079181384146	0.927151994017925	1.14586141817201	0.417127727986683	0.728699840305089	3.24506496058929	3.30075603733027	2.05965266584617	0.592242557296022	1.47982731249542	0.608683755826907	1.57633088912023	0.583178495125208	0.359466917494065
rbm17	0.0436479758961438	0.0436524198859718	0.132213673425317	0.0668321473008709	0.158908446599091	0.25488989361279	0	0.0402149084708683	0	0.04028827950516	0.0880798254884965	0.0934530998883873	0.0523077110144248	0.0835279436619072	0.0706789058963776	0.0378828653328835	0.244344577576902	0.0298055486009275
il15ra	0.031960585428648	0.0664657744271987	0.265619128084356	0.300374492470427	0.532935750108174	0.0542914680803194	0.0674036128336479	0.190930902199765	0.0757363466301113	0.015717753008599	0.107608386688274	0.268310529000423	0.326655354134557	0.989365842969862	0.0669618127312632	0.131405074489824	0.261284296569303	0.25762802055629
acot14	0.0134121555616013	0.00563539025077487	0	0	0	0.0130677103411326	0	0	0	0.0467054462826191	0.025154539383656	0.00321429951655326	0.00545302356524134	0.0279454504806618	0	0.0114092734574662	0	0
acot15	0.0344650523301039	0.0372349798815943	0.0237786068137737	0.0160000531070432	0	0	0	0	0	0.0657419071790417	0.0457504445261964	0.0240161598546189	0.0150920855738798	0	0	0.0206236447506393	0.0118989399234422	0
acot16	0.0421587550365615	0.00108846736176192	0	0.00620732464307883	0.0256364242315482	0	0	0	0	0.0977331830521875	0.00537976290547844	0.000926033325469961	0.00932444403002471	0	0	0	0	0
acot17	0.00862582176136422	0	0	0	0	0	0	0	0	0.0649219634746124	0.00137792785555568	0.00389522468824569	0	0	0	0	0	0
acot18	0.182983462127584	0.0539077531450022	0.00351239937741953	0.0404283052235901	0	0.0388348779082442	0	0.196946723336459	0.0749788184837783	0.272499881977608	0.100103943296858	0.0307803665651593	0.0251436315639965	0.0312087459389619	0.0685040993599259	0.0365180610541411	0.05983942523915	0.0721181031809687
lamb1b	0.00107325294811852	0.00868304288554881	0.00902498536394919	0	0	0	0	0	0	0.008655416539401	0.00693949081783386	0.00199997551144669	0	0.0252818291909056	0	0.280856413519143	0	0
tmcc3	0.195686347785917	0.086145353464268	0.303129309708247	0.053682900522156	0.155027881376102	0.0527257952210124	0.651771764769367	0.767073140738266	0	0.184428686647026	0.095948050914185	0.300450489592935	0.208237870637549	0.0727652256728003	0.220505848837237	0.197821094048663	0.520837756182156	0.166717529086296
ndufa12	0.734977225260632	0.356381423602052	0.626163771981592	0.276260386472917	0.396563449176934	0.69117023518259	1.26704201361795	0.586702654104568	0.272755571212794	0.834634343401201	0.692540333686456	0.917501901827558	0.352987405826369	0.876272209622897	0.534496168921493	0.691490067968981	0.455845080897761	0.511377530868157
nr2c1	0.0233007016375042	0.0631413856972378	0.110719104891271	0.0376410116907285	0.0536039077244474	0.0472519823711452	0	0	0	0.0366678250972404	0.0701377244915183	0.0567066504521432	0.0319432065008647	0.0183082114159021	0.0307929176289453	0.0283198578234979	0.145275262442189	0.0389258944022488
fgd6	0.00885379791211072	0.00461381532199982	0.060393408535282	0.0031637740280728	0.349771434255394	0	0	0	0	0.00863153868781079	0.019492098771753	0.0411954593691284	0.00323849403550361	0.460067822458316	0.00799888015677805	0.0137406817104436	0.01669312527022	0
vezt	0.00239096676054263	0.0272094895415512	0.0038815373999755	0.0140346891327758	0.0189118142103372	0	0	0.105506635716302	0	0.00515852069767888	0.00346541451215399	0.00366571748011352	0.00301070607078772	0	0	0.00515856320500621	0	0
metap2a	0.00483370556518629	0.00136352170385672	0.051654653503862	0	0.0142594361818934	0	0.0674036128336479	0	0	0.00700507268001248	0.00362296894992336	0.0723366243647871	0.00428935104263401	0.0926649198648345	0	0.00198349415503942	0.0197555448875613	0
usp44	0.0825949723549962	0.21612691999107	0.187195897023683	0.647897958678763	0.298502622295786	0.0249275177806035	0.726089429684777	0.327425465004207	0.39239914081362	0.0700849060572727	0.203661614230007	0.169491658748941	0.522982412806065	0.283923501518027	0.254670030753027	0.175014511434052	0.415263348218705	0.343200424609189
si:ch211-265o23.1	0.0100000418234475	0.0132783695646577	0.0109628832556626	0.00592301969759431	0.0424962284597242	0	0	0	0	0.00925274691061578	0.0141673607325197	0.0123636248413595	0.015178986429509	0.0114387290199411	0	0	0	0.0330405936733871
SCYL2	0.175701625698321	0.31117391760013	0.307108087439119	0.363453968219133	0.369618690510913	0.548430652558389	0.366501740883269	1.51375205019549	0.110542474418587	0.141295536034396	0.348821965851695	0.25397210090372	0.217722240826415	0.374579239082235	0.281740465572935	0.206475294244983	0.737123865964095	0.391898808253303
si:ch211-244b2.3	0.0850350256137989	0.111198143876654	0.17586999440661	0.91164510232454	0.592894819429543	0.0369611918414216	0.310655483069276	0.465295175045195	0.599903433923276	0.0558743292718734	0.0928770841887411	0.113978782508761	0.672216040099506	0.408508518760825	0.013776129013921	0.143006545497331	0.676861245263598	0.455817937279466
si:ch211-244b2.4	0.0788830424902232	0.084434182018414	0.141849821730543	0.125350029282511	0.203145949153505	0.039962383918976	0.733003481766538	0.514572004820576	0	0.0622822679499378	0.110481651916408	0.136013952921766	0.119482763850097	0.326643602206356	0.0208680742801708	0.0739084345227156	0.158096364977612	0.0425776405528366
BX957270.1	0	0	0	0	0	0	0	0	0	0	0	0.00190115188891798	0	0	0	0	0	0
st8sia1	0.000754821345864575	0	0	0.00608911540364061	0.0234857558890533	0	0.0674036128336479	0	0	0	0.00110322079427043	0.0010446607077827	0.0150246478797913	0	0	0.00426466875464849	0.0278084430486569	0.0417641162712997
tnni1d	0.0070388894716519	0.00630597499060893	0	0	0	0	0	0	0	0.000124753512010969	0.00413989534344572	0.000916100913279322	0.00358518029871722	0	0	0	0	0
b4galnt3a	0.00918697773551551	0.00130462122931849	0	0	0	0	0.0674036128336479	0	0	0.000343779461899885	0.0123840625952487	0	0	0	0	0	0	0
iqsec3a	0.00605926021238434	0	0	0	0	0	0	0	0	0	0.00884541504244398	0	0	0	0.00622732863170022	0.00120158570862796	0	0
slc6a1l	0.00592835814413856	0.00781831839847007	0.00281101474889726	0.00312292033024258	0	0	0	0	0	0	0.00960189957369925	0.000305316923240761	0	0	0	0	0.0176436857659565	0
creld2	0.0660035923860665	0.499544470462903	0.166688334633937	0.0451986985029508	0.106819580269151	0.21128518726027	0	0.114556551676443	0.144078180998346	0.112237747754114	0.79019357034755	0.177926638518472	0.0655389155910612	0.0832218401967907	0.313276644820228	0.120990021932721	0.205486235891692	0.344759053527209
alg12	0.0361253204668917	0.154856315003267	0.102213717333835	0.057409418151376	0.045153789482334	0.0681067199004848	0	0.0414593698175788	0	0.0860455396081564	0.265360520492242	0.101679722859766	0.0533111624331501	0.0690866813408527	0.303182638415057	0.128996306662452	0.0942420118752739	0.0655741013292126
zbed4	0.0960681845281485	0.384332202812601	0.281784113077221	0.411566503346198	0.357343962756317	0.243935613947561	0.188058298072402	0.230357564699596	0.139135293390041	0.108857168744403	0.297802876793092	0.172948484698291	0.20023719337868	0.30873503942167	0.221229972418005	0.106596519240214	0.379056515934037	0.367518505275039
brd1a	0.0607819087557444	0.111667695886384	0.0486314136544926	0.0298324133367547	0	0.0275611167764518	0	0	0	0.0472679276917874	0.0807744146531381	0.0272760376869447	0.0407947295531544	0.0361233830270672	0	0.0534227541085371	0.0519868767596473	0.0473773117838541
fam19a5a	0	0	0	0	0	0	0	0	0	0	0.00226094012370516	0	0	0	0	0	0	0
tbc1d22a	0.0922897644625455	0.160024186388358	0.0791146160296112	0.108612793368649	0.111408975680404	0.0660974240872348	0	0.131659597084896	0	0.0838033359999306	0.142716226106635	0.0635966945015216	0.103836694110125	0.142628507037785	0.131342172237771	0.0495621862741818	0.08677965206719	0.0540821884472442
cerk	0.00855155477274283	0	0.00231260461017774	0.00250531063221263	0.06883721359251	0	0	0	0	0.00178526509948551	0.00729879037249555	0.00461089871068061	0.00643538334217709	0	0.00905551027800417	0.00946614716451028	0	0
gramd4a	0.00224018043667949	0.0178557521375759	0.00157619119073048	0.00665826209087989	0	0	0	0	0	0.0105483777205942	0.0316667847832152	0	0	0	0	0.0263504611330698	0	0
celsr1a	0.245271039059871	0.64153872710134	0.112979269542864	0.0286981608730017	0.00618394770853818	0.521968917662163	0.0674036128336479	0	0	0.122884801129691	0.445261289364238	0.0149592081318971	0.0206814306526163	0.0935198270694013	0.727888435600072	0.19828277182102	0.0147891802357395	0.0021316843759899
trmu	0.0108879411393537	0.000762399668203664	0.00180883957167988	0.00144378771353981	0	0	0	0	0	0.00984130471337155	0.00481935179807344	0.00702706293387721	0.00297051025939981	0	0	0.00779719799892711	0	0
si:ch73-263o4.4	0.037896669552311	0.00678641389161321	0.00677767277946313	0.00649301740907828	0	0	0	0	0	0.0464405846096179	0.00855386975819992	0.00915123599289824	0	0	0.0422609614368727	0.000922983659128105	0	0.0021316843759899
tprkb	0.00425284950002851	0.00332980479535699	0.0402808431587966	0.0154708042639546	0.0208112214105846	0.011215728938263	0.188058298072402	0.329423474429306	0	0.0126490918202258	0.0249639718566599	0.0267365290605388	0.0425059621687177	0	0.0198084612763129	0.0226857187632714	0.0454603171708869	0
alg10	0	0	0.000943792084868805	0	0	0	0	0	0	0	0.000479696325363051	0.00063566345307008	0	0	0	0.00258188225153724	0	0
CU694442.1	0	0.00343621356754565	0.00390822854069873	0	0	0	0	0	0	0.00821279068443071	0.000337561744262547	0.00145963385238097	0.0110963006089233	0	0	0.0118094428304873	0.00588362657328175	0
znf1041	0.00224333202071177	0.0038507823672215	0.000815077432763651	0	0	0.0242341941750687	0	0	0	0.00455881904513684	0.00777608155332211	0.00261714803821564	0	0	0	0	0.00777658795981993	0
znf1067	0.00156397087260314	0.00166901162800401	0.00201286971987759	0	0	0.0234093356430544	0	0	0	0.000986195628076437	0.00417042111352183	0.000862000674256927	0	0	0.00709710615496531	0	0	0
si:ch73-289h5.4	0.00315023935235046	0	0	0	0	0	0	0	0	0.00230206696492372	0	0.00256714542664865	0	0	0	0	0	0
znf1059	0.00271954522894663	0.000671336483244113	0.00549929773967864	0	0	0.0225034610969823	0	0	0	0.0040262034970224	0.0146148137809066	0.00555550618511107	0	0	0	0.00258012314411742	0	0
BX088538.1	0	0	0.00533492602898356	0.00752099108612137	0	0	0	0	0	0.0046384440265217	0	0	0	0	0	0	0	0
zgc:174315	0.00231431510178031	0.00739857217286072	0.0014145141886382	0.00615195702981054	0	0	0	0	0	0.00555622029362807	0.00687150751319242	0.000463636437818194	0	0	0	0	0	0
si:dkey-23a23.3	0.00965607084695345	0	0	0	0	0	0	0	0	0.00732812554318057	0.00597577509012223	0.00583303531710805	0.00380364084501685	0	0	0	0	0
si:dkey-13e3.1	0	0	0.00107860762972522	0	0	0	0	0	0	0	0	0	0	0	0	0	0	0
si:dkey-23a23.2	0.00319366953452964	0.0139072429740915	0.00270044371305705	0.00332535248736366	0	0.0384419192036495	0	0	0	0.00757356529024481	0.0585731115865162	0.00772125822572596	0.0158688744318406	0	0	0.00362754145554375	0	0
CR388132.1	0.000381221908472356	0	0	0	0	0	0	0	0	0	0	0	0	0	0	0	0	0
CR388132.2	0.00112020038693717	0.00404078251790452	0.000918098372220767	0	0	0	0	0	0	0.00134534829482607	0.00962055761987414	0.00683733140400429	0.0204818085825424	0	0	0	0	0
CR382372.1	0.00131293011293862	0.00365051910645129	0.0023450870660475	0.00272410385155595	0	0	0	0	0	0	0.0125594292270511	0.0140021084573271	0.00190973996025831	0	0	0	0	0.0468329235452523
CR847895.1	0.000576287038707588	0	0	0.0119755459352003	0	0	0	0	0	0.000800477531044822	0.00703944851546895	0.000634337688653614	0	0	0	0	0	0
znf1140	0.00181666122222327	0	0	0	0	0	0	0	0	0	0.000420414415943056	0.00103704617434441	0	0	0	0	0	0
si:ch211-214c20.1	0.0579166597588874	0.0342200563362881	0.0152723379531862	0	0	0	0	0	0	0.0675570602940789	0.0293763744274746	0.00465390716305219	0.00506694703773609	0.0145305963502048	0	0	0.0229274475127097	0.0021316843759899
BX248122.1	0.00207626239118419	0	0	0.00429770919206935	0	0	0	0	0	0	0	0	0	0	0	0	0	0
si:ch211-214c20.1.1	0.022331144707523	0.0488459269136904	0.0321699779720373	0.0211378833915222	0.0261895866369127	0	0	0.141309472686475	0.1624763029311	0.0293566500937226	0.0429108234769121	0.0109482443046458	0.035379419773818	0.0304266732388281	0	0.00680335612090137	0.0305078154589633	0
znf1119	0.00161727457323067	0	0	0	0	0	0	0	0	0.000443147341324186	0.000634937566589077	0	0	0	0	0	0	0
BX530097.1	0.00293707855198485	0.00507022976333005	0.00719229664057585	0	0	0	0	0	0	0.00238438721074459	0.00737531222378508	0.000345411617698698	0	0.0210185152100485	0	0	0	0
si:ch211-231i17.4	0.000318823901985626	0	0	0	0	0	0	0	0	0.000281694394033668	0	0	0.00485354430072561	0	0	0	0	0
znf1121	0.00155420744432485	0.00867188300466504	0.000815077432763651	0.00206018076438063	0	0	0	0	0	0.0035309551290035	0.00711284004980135	0	0	0	0	0	0	0
znf1111	0.00172150610790599	0	0	0	0	0	0	0	0	0	0.00536903877997278	0.000764419863419574	0	0	0	0	0	0
znf1128	0.00123540772682826	0.00904346717621197	0	0.00430864736909683	0	0	0	0	0	0.000218245383935533	0	0	0	0	0	0	0	0
si:rp71-7l19.2	0.00143050001476018	0	0	0	0	0.00732077819872253	0	0	0	0.00137690689193199	0.000600862670553367	0.00134177812705753	0	0	0	0.00499341368734639	0.0118989399234422	0
BX323560.1	0.00366936776906435	0.00752240635556693	0.00331898512184539	0.00480195305034464	0	0	0	0	0	0.010887736048312	0.0221706531044573	0.000472185845549332	0	0	0	0	0	0
si:ch211-22k7.9	0.0119702130508368	0.00335131650230239	0.0325616910830532	0.00814275072801703	0	0.076376345889765	0	0	0	0.0146126877282645	0.0231291239252802	0.00835081061626059	0.0175518146421933	0	0.0974197720351101	0.00373429170195572	0	0
si:dkey-265e15.2	0.00691768972432289	0.004034145003308	0.0768816867769699	0.0154099510143486	0.0327514492516294	0	0	0	0.106658702816856	0.000202231732326726	0.000427219559410177	0.0562680784746479	0.0161749308240888	0	0	0.00290816029779561	0.01055597251647	0.0347945901371255
CR936249.1	0.000171957654670924	0	0	0	0	0	0	0	0	0	0	0.00993541977148535	0	0	0	0	0	0
znf1047	0.00697842343600994	0.000982979706383962	0.00114214405337559	0	0	0	0	0	0	0.00613138826264273	0.000604399861761664	0	0	0	0	0	0	0
znf1083	0.00724372378340438	0.00641620579041959	0	0	0	0	0	0	0	0.0029593383651174	0.00780407734286249	0.00598138018552857	0	0	0.0359485935112789	0	0	0
si:dkey-199m13.7	0.00440457357380548	0.00374430865085071	0	0.00302894826435207	0	0	0	0	0	0.00618223968276703	0.00434074031880972	0.00364609492197015	0.0056165733847437	0	0.0422609614368727	0.00269111490737721	0.0187457900112624	0
CR383668.2	0.0148195361472763	0.052805973181519	0.00583535898007568	0.0107531887660256	0	0.123355412937318	0	0	0	0.0106847522698924	0.0525084122429677	0.00308636513620056	0.0208188027192831	0.0183082114159021	0.0839010139921994	0.00198349415503942	0	0
znf1114	0.00246272830759688	0.0028113727986781	0	0	0	0	0	0	0	0.00647568810944254	0.0109959171782188	0.00330288713757013	0.0040887754935152	0.0256595136495783	0.00946902445375565	0	0	0
si:dkey-199m13.5	0	0	0	0	0	0	0	0	0	9.36006087484071e-05	0.000674569017854493	0.00218150584049102	0.00469828770904444	0	0	0.00362754145554375	0	0
si:dkey-199m13.4	0.000573424428324641	0.0176313777060381	0.00408198743924283	0	0	0	0	0	0	0.00309065320968937	0.00922416178088509	0.0033520755710078	0	0	0	0	0	0
si:dkey-16p19.5	0	0	0	0.00843004704809258	0	0	0	0	0	0.0014517058123978	0	0	0	0	0	0.000922983659128105	0.00470295656067143	0
zgc:172014	0.00317054349242113	0.00370983884909619	0.0112820650480862	0.00446891622971838	0	0	0	0	0	0.00150493076409586	0.0195171720007221	0.0102680342617619	0	0	0.040281973816717	0	0	0
si:dkey-178j11.5	0.00536666492500915	0.00828733860408069	0	0	0	0	0	0	0	0.00616110899775409	0.00473993273297991	0.00905580988924661	0.0193293260062144	0	0	0	0	0
si:dkey-11n14.1	0.205355447367515	0.242242323232825	0.0999738352823318	0.150218854443842	0.193113122296877	0.0484859092553995	0	0.287935846917091	0.239447926053006	0.179098184928375	0.187871729159015	0.0791855968806211	0.198344136185339	0.0370449948507457	0.0251721585356206	0.0261645478140299	0.178058118658136	0.121926844525888
si:dkey-47k16.4	0	0	0	0	0	0.00922394351256993	0	0	0	0.000222356545340634	0.000340269129743326	0	0	0	0	0.0199835335683397	0	0
BX649620.1	0.00284945782178131	0.00844010060599922	0	0.00556045802604852	0	0	0	0	0	0.00535622458677484	0.00784931036328374	0.000799695731767977	0	0	0	0	0	0
zgc:173720	0.00643518471586694	0.0115613017926101	0.0149371208871297	0.00911926189967727	0	0.0101595558242194	0	0	0	0.00653808427808839	0.017457337746954	0.0184025163169488	0.0343026479750683	0	0.00603509407202885	0.00930237574152621	0.0278120142251492	0
si:dkey-57l19.1	0.00405012528687525	0.00138975748731846	0.0106350055461554	0	0	0.00876916061594584	0	0	0	0.00180694391528147	0.00292477778858153	0.00175279860090232	0.00647125046558844	0	0	0.00173421792321161	0	0
si:ch211-127b6.2	0.00759483095832634	0.00625283868583254	0.00389012391265159	0	0	0.00863188878674487	0	0	0	0.00328545309229436	0.0127960420757418	0.0044242256362705	0.00943405126463458	0	0	0.00318623749322128	0	0.0021316843759899
znf996	0	0	0	0	0	0	0	0	0	0	0.0010834672716706	0	0	0	0	0	0	0
si:dkey-19c16.12	0.00837924662899596	0.00332638815569402	0.00793491158357615	0.00173082757962975	0	0	0	0	0	0.0101192988057641	0.00250841447636095	0.0065266982869491	0.00333065215834586	0	0	0	0	0.0021316843759899
si:dkey-265e15.5	0.0191158674691579	0.0193977618917446	0.0165733601496215	0.0147783805599023	0	0	0	0	0	0.00282948275270857	0.00138312548184634	0.00189706988643284	0	0	0	0	0	0
BX548173.2	0	0	0	0	0	0	0	0	0	0	0.000909061488555461	0	0	0	0	0	0	0
BX548173.1	0.012562492257696	0.00596566287040992	0.000875931564167637	0	0	0.0621851874883403	0	0	0	0.00333884188378833	0.000701533341424351	0	0	0	0	0	0	0
si:dkey-16p6.1	0.0291285910701631	0.0782976371012855	0.0138753125632896	0.047739865256168	0.067629394454972	0	0	0	0	0.0311633709060481	0.0231274945127403	0.00334618652734696	0.0422763870859775	0	0.00650596922676556	0.0100257160769893	0.0369729051218268	0
BX539310.1	0	0	0	0.00757298655113318	0	0	0	0	0	0	0	0	0	0	0	0.00373429170195572	0	0
si:dkey-72l17.5	0.0109653191854765	0.0050623940061255	0.00759688180021636	0.00831172269075656	0	0	0	0	0	0.00568904460115348	0	0.000864450676173319	0.00378314985056558	0	0	0	0	0
si:dkey-72l17.6	0.00160443517223531	0	0	0	0	0	0	0	0	0	0.00210493839863505	0	0	0	0	0.00324401900216571	0.00470295656067143	0
CR450785.2	0	0	0	0	0	0	0	0	0	0.000322420724481947	0	0	0	0	0	0	0	0
zgc:174698	0.000520782277937264	0	0.00111740220970757	0	0	0	0	0	0	0.00309365344993335	0.00585258961733372	0.00119343310724166	0	0	0	0.000791888276600874	0	0
si:dkey-16p6.1.1	0.0228948026089176	0.0133642252849329	0.00489291129690039	0.00412995651568785	0.0234074178107042	0	0	0	0	0.0113053919958124	0.0215241567733348	0.000355259348205674	0.0180615557036158	0	0	0	0.0197246828764111	0
si:dkey-265e7.1	0.022157110550034	0.0105806936435171	0.0183572313458312	0.011045014781199	0.015999872001024	0	0	0	0	0.00910334248809937	0.000674569017854493	0.000306358789154874	0.00452971379003418	0	0.00650596922676556	0.00714963908621893	0	0
znf1085	0	0	0	0.00372961624859533	0	0	0	0	0	9.05405152870779e-05	0	0	0.00408728812520181	0	0	0	0	0
znf1108	0	0	0	0	0	0	0	0	0	0.00010515267453304	0	0	0	0	0	0	0	0
znf1042	0.000746809596159477	0	0	0	0	0	0	0	0	0.00113059247568096	0.000326774895819262	0	0	0	0	0	0	0
BX324003.1	0.000213335827371379	0	0	0	0	0	0	0	0	0	0	0	0	0	0	0	0	0
si:dkey-16p6.1.2	0.000213546041135075	0.00323791206478414	0	0.00994999320248072	0	0	0	0	0	0	0.00273639137839696	0.00141007944528603	0	0	0	0	0	0
BX324003.2	0.000381221908472356	0	0	0	0	0	0	0	0	0.00012438445862958	0	0	0	0	0	0	0	0
si:dkey-26h11.2	0	0	0	0	0	0	0	0	0	0.000121912564308878	0	0	0	0	0	0	0	0
si:dkeyp-4f2.1	0.0230949483129814	0.0177962057069827	0.00381492865511176	0	0.0179018976011457	0.0157387369663585	0.0674036128336479	0	0	0.0569211340907141	0.0314969960995921	0.00402812701493493	0.00273081906821723	0	0.0763551500815764	0.0034508436446414	0	0
znf1112	0	0	0	0	0	0	0	0	0	0.000646403569757292	0	0	0	0	0	0	0.0196098041176667	0
si:ch211-162i8.4	0	0.00733657834307946	0	0.00616417541517263	0	0	0	0	0	0.00623567749882784	0.00664477037806251	0	0	0	0	0.00182874464726442	0	0
si:dkey-247i3.6	0	0	0	0	0	0	0	0	0	0	0	0	0	0	0.0257698750161062	0.00426466875464849	0	0
si:dkey-247i3.5	0.00109185922286782	0.00735130056487997	0.000844380361604201	0	0	0	0	0	0	0.00220680756734705	0	0.0023490583081874	0	0	0	0.00821306205861339	0	0
znf1000	0	0	0	0	0	0	0	0	0	0.00161626505712527	0	0.0004221730165499	0	0	0	0.00120158570862796	0	0
znf1055	0	0	0	0	0	0	0	0	0	0.000396774257032268	0	0	0	0	0	0	0	0
si:dkeyp-4f2.3	0.001014278917168	0	0	0	0	0	0	0	0	0.000375923935768325	0	0.000373427789652159	0.00928207770027243	0	0	0	0	0
znf1090	0	0	0	0	0	0	0	0	0	0.00132724920860944	0.0010354036844	0.00129612380067128	0	0	0	0.015172757011331	0	0
si:dkeyp-4f2.3.1	0.000194688906110204	0	0	0	0	0	0.188058298072402	0	0	8.05927759859317e-05	0.00151517225801751	0.000856403267281233	0.00566613971567311	0	0	0.00287232514720666	0	0
znf1065	0.00219284415191653	0	0	0	0	0	0	0	0	0	0	0.000978987693439402	0	0	0	0	0	0
si:dkey-247i3.1	0	0	0	0	0	0	0	0	0	0	0	0.00315867253855126	0.00190973996025831	0	0	0.00182874464726442	0	0
CT027801.2	0.00182909821866219	0.00284615669231054	0	0	0	0	0	0	0	0.000668485311945352	0.00214640496191361	0.00232991629950587	0	0	0	0.00521243812835942	0	0
CT027801.1	0	0	0	0	0	0	0	0	0	0	0.000681781024752333	0	0	0	0	0	0	0
si:dkey-84h14.2	0.00444746000290779	0	0.00697770483750321	0	0	0	0	0	0	0.00390498502456433	0.00573686471493599	0.00172459299195057	0	0	0.0147557916482219	0	0	0
si:dkey-84h14.1	0.00966236966146661	0.0163567956884504	0.0206179451196403	0.0167476068950368	0	0.00883462466097128	0	0	0	0.0065113088446657	0.00471655234378518	0.0142964756057866	0.0110102450330032	0	0.0379333521243844	0.0177954949637107	0	0
si:ch211-197f20.1	0.00591251165684858	0.00195747962753078	0.0117391630757376	0.010070038355159	0.0235014864690192	0.025375201347577	0	0	0.0624235311743115	0.00476423755208707	0.00584150538981725	0.000922680142225608	0	0	0	0	0.0110285075892675	0.0368837645045404
AL807749.1	0	0	0	0	0	0	0	0	0	0	0	0.00135335358311188	0	0	0	0	0	0
znf1026	0.00918204523658394	0.0505439152613245	0.0130594143782949	0.00511175807066651	0.0111213056412823	0.0671524023771951	0	0	0	0.00430444224068237	0.0191178421531847	0.00543091576613777	0.0149674890674938	0.021084591380619	0	0.000791888276600874	0	0.0194196627969752
si:dkey-28i19.3	0.00714764241744896	0.0284981668046733	0.0396951873850349	0.100039756732169	0.0440985160849337	0.0231303119339885	0.433905353716917	0	0	0.00267139153829731	0.00525234706714327	0.00988211155530001	0.0040887754935152	0	0	0.000922983659128105	0.0373169973938782	0
si:ch211-223g7.6	0.0412617853112206	0.0255573948711044	0.00791343974069172	0.0116944542467217	0	0	0	0	0	0.0128294119270711	0.0150827252316002	0.000406356636870566	0.0148239999324114	0	0.0649772579597141	0.0110430349839878	0	0
si:ch211-246b8.5	0	0	0	0	0	0.0101595558242194	0	0	0	0	0.00443879829301573	0.000759201714581152	0	0	0.0369344413665743	0	0	0
CT025695.1	0	0	0	0	0	0	0	0	0	0.000183422023996003	0	0	0	0	0	0	0	0
si:ch211-246b8.1	0.00903506612663479	0.027569260119241	0.01046334987908	0.0232119957126043	0.0343997248022016	0.011215728938263	0.134807225667296	0	0	0.0119454122034796	0.0229442942866617	0.0156839740531987	0.0278910170416915	0.0304266732388281	0	0	0.0196098041176667	0
si:ch211-246b8.2	0.0570729894402468	0.0201039311317564	0.0178406000104597	0.0192101366383818	0.0229331498681344	0	0.366501740883269	0	0	0.0403649994538248	0.0537418794329587	0.0196548436954153	0.0436024348758138	0.128031677995474	0.0543299768786068	0.00487280991558344	0	0
si:ch211-64i20.3	0.00644781979878121	0	0.0132325598975371	0.00619081580094298	0	0	0	0	0	0.0077031151246606	0	0.000355250879769922	0	0	0.00605455150909696	0	0	0
si:dkeyp-51g9.4	0.0644542242105537	0.0812627779392009	0.0133677743324226	0.00878291503486312	0	0.0448768107923977	0.0674036128336479	0	0	0.0375516650152702	0.020142410344723	0.0170899370903671	0	0	0.0251430809716194	0.0266097358214774	0	0
AL645691.2	0.00489907303777215	0.0104455180262989	0.0117900755811842	0.0239547704275011	0	0	0	0	0	0.00729167106503795	0.00529464218782168	0.00201811876107784	0.00830447528172932	0	0	0.00538816328290013	0	0
si:ch211-237a4.2	0.00303773669742526	0	0	0	0.0249025686999614	0	0	0.0427745269137323	0	0.00120158788798726	0.000982764473221536	0	0.00307329186438178	0	0	0	0	0
znf985	0	0.00397288900542697	0	0	0	0	0	0	0	0.00157794039017665	0	0	0	0	0	0	0	0
CR388228.1	0.00225929777998785	0.00193648709621823	0	0	0	0	0	0	0	0	0	0	0	0	0	0	0	0
si:dkey-279j5.1	0.0128495650001884	0.0365919671355439	0.0248659561595582	0.0144017967134442	0	0	0	0	0	0.0208567288895942	0.0239119350458972	0.00412853653474401	0.0164525166281111	0	0.00723693732812274	0	0.0132073876843751	0
si:dkey-269p2.1	0.00202469725714263	0	0	0	0	0	0	0	0	0.00301584768106797	0.00123964192607241	0	0.0144050705848459	0	0	0	0.0278648554510624	0
si:ch211-276i6.1	0.0519001626343528	0.0219073120479592	0.00481486367676472	0.0181828705782792	0.00618394770853818	0	0	0	0	0.0166925438086492	0.0213116094820435	0.00585584829061703	0.0171808158768487	0	0.00650596922676556	0	0	0
zgc:174698.1	0	0	0	0.00500590697022486	0	0	0	0	0	0	0	0	0	0	0	0	0	0
CR847906.1	0	0	0.00349805121569253	0.0450302230821594	0	0	0	0.0427745269137323	0.0920522120146547	0.000613653847192337	0.00247217444058401	0.0184725061788787	0.0542774950402254	0.0584562307982806	0	0	0.0125120898067758	0.0587168029875109
si:dkeyp-4c4.2	0.460671240661691	0.150904231989773	0.101449857091144	0.282840393736713	0.154303727457021	0.0450786908759541	0.25546191090605	0.276196400984565	0	0.444554612229001	0.23189527339269	0.113607396163333	0.159442450700054	0.260695894468979	0.111379941212768	0.0505409705324692	0.111443490402141	0.280899196556796
zgc:174653	0.00800985910802291	0.00820946119815751	0.00810183707171552	0.00713445657988215	0	0.0253659201472913	0	0	0	0.00592880391717369	0.0170279836195994	0.00539560200675106	0.00371928336848056	0.0292027929551182	0.0171732783788425	0.00440553476143148	0.0170280008445888	0
si:dkey-176f19.7	0.00141859532875012	0	0.000875931564167637	0.00843004704809258	0	0	0	0	0	0.00112435368976601	0	0.00436151645887234	0	0.0300822448574402	0.0422609614368727	0	0	0
znf1089	0	0	0	0	0	0	0	0	0	0.00409117092584834	0.00249500375498065	0	0	0	0	0	0	0
si:dkey-176f19.4	0.361948217239251	0.106368723608259	0.00813850035787254	0.0341971152581753	0.0142594361818934	0	0	0	0	0.360417812089939	0.131756385862242	0.0278572354018374	0.0235123315894652	0	0.00946902445375565	0.0220902589599253	0	0
zgc:174180	0.0274103340176443	0.0195989620770827	0.0116747549620546	0.00413178920107311	0	0.0266308038508142	0	0.144375144375144	0	0.0277957427569611	0.0158028445821746	0.0089939253832544	0	0	0	0.0119012684170189	0	0
znf1125	0	0	0.0097136025249654	0.0500496903184083	0	0	0	0	0	0	0	0.00934119525542979	0.156541002271814	0	0	0	0.114026029037755	0.034662525650269
si:dkey-176f19.1	0	0	0	0	0	0	0.0674036128336479	0	0	0	0.0038238698539662	0.00174624918854646	0	0	0	0	0	0
si:ch211-271g18.4	0.000358323069303718	0	0.000815077432763651	0	0	0	0	0	0	0.000997293743697104	0	0.000917420601299053	0	0	0	0	0	0
znf1109	0.00369135094762038	0	0.00119822973538894	0.00784352174781656	0	0	0	0	0	0.00166580359009281	0.00256357149262301	0.00154259578167157	0	0	0	0	0	0
znf1116	0.000578435298414219	0	0	0	0	0	0	0	0	0.000523908018517005	0	0.000759201714581152	0	0	0	0.000578518497434733	0	0
si:dkey-190j3.2	2.85303290152092	0.968913481051384	0.250181022304099	0.358361718000134	0.234743743459344	0.391182611332441	0	0.0912612740192303	0.253185256839948	3.09488297245428	1.01082932496308	0.140337373441772	0.279670540412109	0.142137971279093	0.157715092604612	0.160094734031275	0.0971863384070835	0.24269460074278
si:dkey-238o14.1	0.0038066175475688	0.00794927336727963	0.00477629845511695	0.00225556854763039	0.0211202162710146	0	0	0	0	0.0151926286444358	0.0100491513901017	0.00539437139378072	0	0.0264101013355588	0	0	0.00470295656067143	0
BX649453.1	0.00157254006439111	0.00419392775485001	0.00149432109391116	0	0.0214080044528649	0	0	0	0	0.00076185275275684	0.00046943168815991	0	0	0	0	0	0	0
si:dkey-151g22.1	0.00145656790334587	0.00270149027178248	0.000925675907720109	0	0	0	0	0	0	0.00228172316497535	0.00229297101378694	0	0	0	0	0	0	0
BX537137.3	0.00129690147413665	0.00421935587313241	0.00300486151979534	0	0	0.00968804495252858	0	0	0	0.00109032020503441	0.00379990631236274	0.000930714437544634	0	0	0	0	0	0
si:dkeyp-87d1.1	0	0	0	0	0	0	0	0	0	0.00191120393616273	0	0	0	0	0	0	0	0
si:dkey-3p4.7	0.0112137207974509	0.00529834149512188	0.00285729551836055	0	0	0	0	0	0	0.0116233631473339	0.00818350134826516	0.0060132980150665	0	0	0	0.0229092142572088	0	0
znf973	0.000284378648578061	0	0.000772459173215318	0	0	0	0	0	0	0.00177765632350267	0	0	0	0	0	0	0	0
CR556708.1	0	0	0	0	0	0	0	0	0	0	0	0.00225342536068806	0	0	0	0	0	0
si:dkeyp-86c4.1	0.00355007091895634	0	0.00376855645649741	0	0	0	0	0	0	0.00464880136648545	0	0	0	0	0	0	0	0.0021316843759899
znf1102	0.00137388473189533	0	0.00185266323934937	0	0	0	0	0	0	0.00262174707332862	0.00106841105446867	0	0	0	0	0.00134388660607351	0	0
znf1100	0.000754821345864575	0	0	0	0	0	0	0	0	0	0	0	0	0	0	0	0	0
si:dkey-3p4.1	0.0170069948827724	0.0146541169269267	0.00173750569656399	0.0330365646126482	0	0	0	0	0	0.0130571664109386	0.00409204148243248	0.00727773599354718	0.00710686594318771	0	0.0253052445119251	0	0.0187498117484252	0
znf1139	0	0.00683214112470707	0	0	0	0	0	0	0	0.00115786304795869	0	0	0	0	0	0	0	0
si:dkey-3p4.8	0.00727780129120642	0.0228120663069854	0.0105690712947812	0.00919095305266798	0	0.00749080503681731	0	0	0	0.0042433312145036	0.01351771185235	0.00473407722660169	0	0	0.00606943432872056	0.00420605995297849	0	0
si:dkey-207l24.2	0	0.0050673963717442	0.00333772294201946	0	0.0260939905539754	0	0	0	0	0	0	0	0	0	0	0.00596422419757328	0	0
si:ch211-271g18.1	0.269897542009608	0.0812304931032194	0.0196070032028326	0.0375263565090773	0.0448508193157749	0	0.0674036128336479	0.0439800154809655	0	0.263295533170894	0.0891293676052012	0.0203337788985092	0.0191026802073779	0.0286212295107773	0	0.0184646775403452	0	0
si:dkeyp-82b4.2	0.120836808334192	0.0210633470682875	0.00300884540371785	0.0120775250669248	0	0.00910709488226803	0	0.0219900077404827	0	0.114287454439193	0.0413369697312621	0.00120927699263454	0.0179700809048969	0	0	0.015143565159422	0.0163791310215828	0
CR759843.2	0.0047150692675382	0.0803276040766309	0.187025735292431	0.021038569484082	0.0743719122177644	0.0441452378324688	0	0.149093511450382	0	0.000601930310693384	0.0349063566473037	0.221645066509933	0.020786623779941	0.0219967312857309	0.0434404105933399	0.00192240510350824	0.100875395831915	0
znf1051	0.000839990679463421	0	0	0	0	0	0	0	0	0	0	0.00195925583975505	0	0	0	0	0	0
znf1016	0	0	0	0	0	0	0	0	0	0.00107590001187794	0	0.0011963552138093	0	0	0	0.000791888276600874	0	0
znf1071	0	0	0	0	0	0	0	0	0	0.00048394259124544	0	0	0	0	0	0	0	0
si:ch211-229l10.11	0.000284157686147154	0	0.00246893645871062	0	0	0	0	0	0	9.42607495147268e-05	0.00486354355838246	0.000951668560487102	0	0	0	0	0	0
znf1093	0.000933085248290673	0	0	0.00600708836426984	0	0	0	0	0	0.00219192110486852	0	0.000345411617698698	0	0	0	0	0	0
si:ch211-229l10.4	0.00234104570137236	0.0183372696044963	0.00868058396201192	0.0312610738190525	0	0	0	0	0.0757363466301113	0.00677574589112301	0.00414545078098001	0.00374690171686803	0.0331107593204725	0	0	0	0.0087025158102956	0
si:ch211-209n20.3	0.0180992383538596	0.0689709438788196	0.0250049485575503	0.0260958943737338	0	0	0	0	0.0783520986609626	0.0107674577409963	0.00525291839314782	0.00483083965816408	0	0	0	0	0	0
CR381657.1	0	0	0	0	0	0	0	0	0	0	0	0	0.00347163758880883	0	0	0	0	0
znf1092	0.00176458264239604	0.000626598217077433	0	0	0	0	0	0	0	0.000355315188124403	0.00191190697425426	0	0.00151397359781443	0	0.0416796915702824	0.00159311874661064	0	0
znf994	0.00371988243683547	0	0	0	0	0	0	0	0	6.61015823014294e-05	0.00443283974299197	0.000676874063702196	0	0	0	0	0	0
si:ch211-209n20.59	0.00159134486623394	0	0	0	0	0	0	0	0	0.00158676327941183	0.000715615839669992	0	0	0	0	0	0	0
si:ch211-209n20.1	0.00444738139469174	0.00997446519640909	0.00124325626719268	0	0	0	0	0	0.0920522120146547	0.000862337068411177	0.00162852988472561	0.00271744714259077	0	0.0415594778467203	0	0	0	0
si:dkey-59l11.10	0.0059030551904977	0.000762399668203664	0	0	0	0	0	0	0	0.00209580114264245	0.00339290827883192	0.00102788527945882	0	0	0	0	0	0
znf1127	0.0004519483334473	0.00468671643959525	0.00232385751594784	0	0	0.00815078960774325	0	0	0	0.000366482291868843	0.00405891047842395	0	0	0.0301595439876949	0	0	0	0
znf977	0.000213546041135075	0.00385753357018589	0.00207853748635252	0	0	0.0348620335024142	0	0	0	0.00517076805795113	0	0.00184691288726376	0	0	0	0	0	0
si:dkey-122c11.8	0	0	0	0	0	0	0	0	0	0	0	0.00086050751528541	0	0	0	0	0	0
si:ch211-22k7.9.1	0.0556013143577527	0.0443890209615785	0.0378781189352389	0.0422699381486157	0	0.0101595558242194	0	0.0523516354650919	0.0527339939144971	0.0624350519968429	0.07422089210254	0.0162536201023398	0.0335093514271759	0.0609246626756734	0.0296785438202339	0.024463298080322	0.061525495619326	0
si:dkey-261o4.1	0.00301715664654968	0	0	0	0	0	0	0	0	0.00180474245373358	0.00459535413376453	0.00502495235121772	0.0203970078201208	0	0	0	0	0
si:dkey-156k2.4	0.235138035101557	0.107334127243913	0.0651150024037349	0.0167860624837242	0.0128510753137269	0.0592206394144692	0	0.0912612740192303	0	0.0511247691504177	0.0440622500118616	0.00106193028767479	0	0.0435042688563815	0.079733049607936	0.000791888276600874	0	0
si:dkey-261o4.9	0.00159474369527748	0	0.00751322784745352	0.00724308593124718	0	0	0	0	0	0.000795831511041074	0.00106524906808035	0.00235016715501216	0.00573409290950741	0	0	0	0	0.0346888582856072
BX548067.1	0.000296963818165966	0	0	0	0	0	0	0	0	0	0	0	0	0	0	0	0	0
BX548067.2	0	0	0	0	0	0	0	0	0	0	0	0	0.00584901356386246	0	0	0	0	0
BX950868.3	0.00120696680551613	0	0	0	0	0	0	0	0	0	0	0	0	0	0	0	0	0
CR749167.2	0.000606948967057395	0	0	0.00493428032041243	0	0	0	0	0	0.000135429742408296	0	0	0	0	0	0	0	0
si:dkeyp-4c4.1	0.0108457544371197	0.00167238622756494	0.00253545144317195	0	0	0	0	0	0	0.00371408303650172	0	0.00360918983661973	0	0.0279454504806618	0	0	0	0
znf979	0	0	0.000632924611716574	0	0	0	0	0	0	0	0	0	0	0	0	0	0	0
si:ch211-215p11.1	0.0164002555462178	0.0423230358375219	0.0236363557120064	0.01667642862256	0.0859668736539849	0.00883462466097128	0	0	0.080907458049483	0.0192582522311633	0.0530097527129142	0.00807454088145648	0.0119790928987216	0	0	0	0	0.0587793323585043
BX649341.1	0	0	0.00159792678587094	0	0	0	0	0	0	0	0	0	0	0	0	0	0	0
si:dkey-5i16.5	0.00291303594620563	0.00641667308333975	0	0	0.0215658999989217	0	0	0	0	0.000181194950256188	0	0.00109271464307615	0	0	0	0	0	0
si:ch211-238e22.8	0.000554754027496362	0.0126062072964728	0.0312279556438975	0.00417252384701692	0	0	0	0	0	0.00702387463249993	0.00194449629767905	0.0021702647732032	0.0102846270537115	0	0	0	0	0
znf995	0.000235600542484385	0	0	0	0	0	0	0	0	0	0	0.000355259348205674	0	0	0	0	0	0
znf1102.1	0	0	0.0023450870660475	0	0	0.00749080503681731	0	0	0	0	0.00720993009251782	0	0	0	0	0	0	0
si:dkey-22h13.2	0.00146615016760856	0	0.00103790286329377	0	0.0228287048134324	0	0	0	0	0.0028440132689528	0.00357492332618511	0.000670828666601909	0	0	0	0	0	0
si:ch211-218h8.1	0.0103342980743845	0.0217923386536391	0.0086400036078415	0.0588729194240443	0	0.00646684127138099	0	0	0	0.00430606176107477	0.0149594730638543	0.00901749594501882	0.00539270968417553	0	0	0.00307522534110793	0	0
si:dkey-22h13.3	0.00147501262242052	0	0	0	0	0	0	0	0	0.000909579766871068	0	0.00435127873203738	0	0	0	0	0	0
si:ch211-218h8.3	0.0195629099139756	0.000955222055695177	0.0015687076703844	0	0	0	0	0	0	0.00706848149390739	0.00244581654635462	0.00132413413213932	0	0	0.0192544264144419	0.000578518497434733	0	0
BX901907.4	0.00426327296158846	0.013853899444454	0	0	0.0041581338295373	0	0	0	0	0.000329314467390491	0.00911704000191869	0.000504797265089185	0	0	0	0	0	0
BX901907.2	0.000127261903763505	0	0	0	0	0	0	0	0	0	0	0	0	0	0	0	0	0
si:dkey-57c22.1	0	0	0	0	0	0	0	0	0	0	0	0.000471215406368863	0	0	0	0	0	0
si:dkey-207m2.4	0.00583047854810269	0.020996557330163	0.0269269465128396	0.0254681202909643	0.0457190158700117	0.0178486485426851	0.0674036128336479	0	0	0.00516184440315971	0.000600862670553367	0.00432373943689891	0.00897970621577349	0	0	0	0.00454120851549256	0.0362397622671595
AL845295.1	0	0	0	0	0	0	0	0	0	0	0.00247157930951983	0	0	0	0	0	0	0
zgc:174650	0	0	0	0	0	0.0101595558242194	0	0	0	0	0	0	0	0	0.0422609614368727	0	0	0
znf1136	0.00258415568900488	0.00170723920640693	0.00184906850893894	0	0	0	0	0	0	0.00176922132479579	0.00991641762450997	0.00209945654561043	0	0	0	0	0.00896115161551641	0
BX571664.1	0.015932327802815	0.0459467301397961	0.0421953928596614	0.0350000239234174	0.0636141911180523	0.0875012881652815	0	0.0692712662787476	0	0.0198954775792426	0.0652800712717908	0.030713630341556	0.060374036332928	0.146972964995104	0.0595674192073669	0.0645035833406394	0.250552219204215	0.101346932157635
si:dkeyp-82h4.1	0.00511640583137205	0.00430435213043909	0.00479173693617234	0.00459574874857762	0	0	0	0	0	0.0190073854534068	0.0048186454354528	0.000570782445700039	0.00485564177017276	0.0201986333604668	0	0	0.035287371531913	0
si:dkeyp-82h4.3	0.00068390640762212	0	0.0014733279753306	0	0	0	0	0	0	0	0.000482242388527261	0	0	0	0	0.000922983659128105	0	0
znf1062	0.00283551109021041	0	0.004625307109879	0	0	0	0	0	0	0.000346144087302584	0.00627832993064583	0.000737812667435287	0	0	0.00607275156373353	0.00603357564173111	0	0
si:ch211-73m21.1	0.0028351823802037	0	0.00140524614923911	0	0	0	0	0	0	0.00807071529795084	0.0207358660851278	0	0	0	0	0	0	0
CR382294.1	0.000398323694563798	0.00590130197284813	0	0	0	0	0	0	0	0.000134393370901835	0.00249500375498065	0	0	0	0	0	0	0
si:ch211-181p13.2	0.0201523816920436	0.0511696761936195	0.0131116453133719	0.00659418340270414	0	0.045176040388804	0	0	0	0.0236039232324451	0.0304951438712849	0.00342855364111541	0.00750403788223887	0	0.00797352788741379	0.0436665017984561	0	0.0349811801250927
si:dkey-16p19.5.1	0.0014349273208802	0	0.000632924611716574	0	0.0247386975075762	0	0	0	0	0.00076185275275684	0	0.000597224078593733	0	0	0	0	0	0
si:dkey-16p19.8	0	0	0.00506651274746296	0	0	0.0180450156255338	0	0	0	0.000533726477611258	0.00105153047501347	0.00323997430571436	0.00998548708973713	0.0355220858568815	0	0	0	0
CR388165.1	0.0117649307579571	0	0	0	0	0	0	0	0	0.00564081417227944	0.00538704062999572	0	0	0	0	0	0	0
znf987	0	0.00205522808921334	0	0.00348009230596832	0	0.0101595558242194	0	0	0	0	0.000751251134342965	0	0	0	0	0	0	0
si:dkeyp-44d3.1	0.00284461598110947	0	0	0	0	0	0	0	0	0	0	0	0	0	0	0	0	0
si:dkeyp-44d3.3	0.00243681663691076	0.00679232467311937	0.000700348822738141	0	0	0	0	0	0	0.00520144893258209	0.00933475111799383	0.0010265277350343	0	0	0	0	0	0
znf1094	0.00223888727304902	0.00297615138506712	0.00496261384355959	0	0	0	0	0	0	0.0015747317287027	0.0148750134028776	0.000871782957427787	0	0	0	0.00426466875464849	0	0
si:dkeyp-44d3.5	0	0	0	0	0	0	0	0	0	0	0.00128787511938602	0.0101298939017758	0	0	0	0	0	0
znf976	0	0	0	0	0	0	0	0	0	0.000360360879799466	0	0	0	0	0.00650596922676556	0	0	0
BX088603.1	0.00508039699280206	0	0	0	0	0	0	0	0	0.00329942061624573	0	0	0.00684493149934802	0	0	0	0.0087025158102956	0.032678029906933
znf1049	0.000175280084867813	0	0	0	0	0	0	0	0	0	0	0	0	0	0	0.015172757011331	0	0
si:dkey-237m9.2	0	0	0	0	0	0	0	0	0	0.000523908018517005	0	0	0	0	0	0	0	0
si:dkey-237m9.1	0.000562740437886342	0.00178595985519438	0	0	0	0	0	0	0	0.00036949125488098	0	0	0	0	0	0	0	0
si:ch211-268b14.2	0.00104983367265162	0	0	0.00171173581480251	0	0	0	0	0	0.000183008281344341	0.00181522992428313	0	0	0	0	0	0	0
CR854899.1	0	0	0.00153879273400537	0	0	0	0	0	0	0	0	0	0	0	0	0	0	0
CR954226.1	0	0	0	0.00740436339134652	0.0250269039217158	0	0	0	0	0.00296781238764988	0.0061520772426819	0.00230298497279355	0.00205711370490292	0	0	0	0.0235125933449956	0
znf1145	0	0	0.00134155707822284	0	0	0	0	0	0	0	0	0	0	0	0	0	0	0
si:ch211-142b24.8	0.00139980085110834	0.00452634493047404	0	0	0	0	0	0	0	0.00151095890456204	0.000565515860740588	0	0	0	0.0837520938023451	0	0	0
si:dkeyp-85d8.5	0.000882028199147149	0	0	0.00970905835726616	0	0	0	0	0	5.94036162070173e-05	0	0.00180294334106315	0	0	0	0	0	0
zgc:174696	0.00151934590749265	0.00384752900251773	0.00230791456245117	0.00283741793832645	0	0	0	0	0	0.00636869705679125	0.0151825126139031	0.00229616158899344	0	0	0	0.00158377655320175	0	0
znf1060	0	0.00126935770500127	0	0	0	0	0	0	0	0.00189690328845864	0	0.0118926804027499	0	0	0	0	0	0
znf1148	0	0.0151712774122769	0.0045846707318544	0	0	0	0	0	0	0	0	0.000916100913279322	0	0	0	0	0.0155113791477428	0
si:ch211-76m11.8	0.0233881629345122	0.0333316855933183	0.0239079673292327	0.0292152178708556	0.0131546060853208	0	0	0	0	0.0349741065453654	0.0630309088737623	0.0188104217538534	0.0470138396043159	0.0262086100525745	0.0140605883461458	0.0388712588637237	0.0608154135680056	0
si:dkey-4e4.1	0	0	0	0	0	0	0	0	0	0.000201912743650127	0.000704711404471507	0	0	0	0	0	0	0
znf1118	0.00113442085266109	0	0.000894355027822491	0	0	0	0	0	0	0.000198230106459082	0	0.000561640461926814	0	0	0	0	0	0
BX511066.2	0	0	0	0	0	0	0	0	0	0.00113125857494	0	0.0046283011357851	0.0021438570990612	0	0	0	0	0
BX511066.1	0	0	0	0	0	0	0	0	0	0.00133311008183163	0	0	0	0	0	0	0	0
si:ch211-59d8.2	0.01935912924173	0.034079418338523	0.0320806229390635	0.0694156909891881	0	0.00962139798912782	0	0.0219900077404827	0.0527339939144971	0.0145960438730813	0.040950118237775	0.0127087432784962	0.0214902538559318	0.0741903911778097	0	0.00670884270373291	0.0334448405922646	0
si:ch211-59d8.3	0.0114046756316345	0.00520153623341145	0	0.0040751510341286	0	0.0092167597559402	0	0	0	0.00780350068603253	0.0109742201074646	0.00102335574107176	0.00780545679484528	0	0	0.0027947044552386	0	0
si:dkey-16p6.1.3	0.0324865023215337	0.021370492878983	0.0356688348670344	0.059707880625087	0.0193427339020097	0.0181524221200079	0	0	0.0624235311743115	0.0162789548103756	0.0283763609645631	0.0134040636962851	0.0308215142153866	0	0.0478624621961618	0.0205023718956874	0.0180310783666728	0
si:dkey-11d20.1	0.000710480638146114	0	0	0	0	0	0	0	0	0	0	0	0	0	0	0	0	0
znf1053	0.000296107235116755	0	0	0	0	0	0	0	0	0	0	0	0	0	0.00727524053764028	0	0	0
CT027759.1	0.0178572984887467	0.00536849171904378	0.00300514721615183	0	0	0.00820031735228153	0	0	0	0.0197977129541956	0.00970649290961472	0	0.0056647113971161	0	0.0294623151999105	0.00348567110322885	0	0
si:zfos-451d2.2	0.0012344673150089	0.00421935587313241	0	0	0	0	0	0	0	0.000811319530083728	0	0	0	0	0	0.00258593581914172	0	0
znf1072	0.000214132147886342	0.00149370998724372	0.00161725940660415	0	0	0	0	0	0	0.00384577276560723	0.000786938834596381	0	0	0	0	0	0	0
znf1137	0.000377361993624545	0	0	0	0	0	0	0	0	0.00120535332886485	0.00199203345978762	0	0	0	0	0	0	0
si:dkey-16p6.2	0.00021741816494416	0	0.0013811149381806	0	0	0	0	0	0	0	0	0.000774550681213451	0.00611980122885609	0	0	0	0	0
si:ch211-76m11.5	0.0118219380487688	0.0115987882334064	0.0125913657013142	0.0254032144635124	0.050813091521456	0.00910709488226803	0	0	0	0.00999932221287935	0.0098625441199413	0.00600910974558607	0.0126810327593065	0.0477289447617154	0.00607275156373353	0.00239610259536249	0	0.0368837645045404
si:dkey-29j8.1	0.0310542802389974	0.0139126563434757	0.00482702958089756	0.00989100176595625	0.0189118142103372	0	0	0	0	0.0198553062889882	0.0147789499276889	0.00528864364585256	0.00736301117705097	0	0.0126202871115318	0	0	0
si:dkeyp-53e4.1	0.00155272242788622	0.0148477495767259	0	0	0	0	0	0	0	8.05927759859317e-05	0.00315896053510871	0.000632238658460378	0	0	0	0	0	0
si:dkey-29j8.2	0.000770627561325193	0.00139383701027537	0.000579079099772897	0	0	0	0	0	0	0.00743607187589844	0.000791091450093307	0.000981533160693822	0	0	0.00606943432872056	0	0	0
BX927253.2	0.000252051478489864	0	0	0	0	0	0	0	0	0	0.00131543119176751	0	0	0	0	0	0	0
BX927253.1	0.000155750088454369	0.0235105365361878	0	0.00234977589012448	0	0	0	0	0	0	0.000977803852547179	0.00295544148651277	0.00997864569820584	0.0271587100699065	0	0.00290816029779561	0.0458622595455579	0
znf1073	0.00109351057244294	0	0	0	0	0	0	0	0	0.00233906523287987	0.0016188805505748	0.00153292837453487	0	0	0	0	0	0
si:dkeyp-53e4.2	0	0	0	0	0	0	0	0	0	0	0.000490045365459662	0.00103027161957979	0.0115894327552138	0	0	0	0	0
si:dkeyp-53e4.4	0.0168107029622865	0.0366736397098669	0.0657155971597914	0.0138161312162829	0	0	0	0.0668914218440627	0	0.00503029940947668	0.0172373868645237	0.021057691582565	0.0258080771970227	0	0	0.0250184341117792	0.0885315827844564	0
si:dkey-16p6.4	0.000339643317456593	0	0	0	0	0	0	0	0	0.00441482467458743	0	0	0.0040887754935152	0	0	0.000578518497434733	0	0
si:dkey-29p23.2	0	0.00888154681019246	0.00737998121056784	0	0	0.0130677103411326	0	0	0	0.00267515872849558	0.0011487809076258	0	0	0	0	0	0	0
si:dkey-29p23.1	0.0039419252775956	0.00936794948938721	0.026866870368646	0.0217794599665011	0	0	0	0	0	0.0183724472567085	0.00921830621413712	0.000634797020796014	0.00356583784708974	0	0.00667902285895574	0.00526577530929154	0	0
zgc:173705	0	0.00136890852816324	0	0	0	0	0	0	0	0.00256847795787294	0.000988085234780097	0.000923348289768281	0	0	0	0	0	0
si:ch211-226o13.1	0.00388628961820907	0.0158375698832771	0	0	0	0	0	0	0	0.00877383310050739	0.00451244952039687	0.00511644033055423	0.00493671136036018	0	0	0.023778272365843	0.0146010553642817	0
si:dkey-261p22.1	0.0549296915214255	0.0278253523223064	0.040555179146309	0.0183892996547865	0.0111213056412823	0	0	0	0	0.0433137540430796	0.0299507561714161	0.0239450101208327	0.0255142188509823	0	0.0147557916482219	0.00938191067606652	0.0897059477050024	0.0413980965155222
znf1104	0.00453386261426201	0.000798338179246081	0.0015687076703844	0	0	0.0201989213851948	0	0	0	0.010877389903879	0.000221422973855792	0.00150662714085051	0.00405264384352742	0	0	0	0	0
CABZ01015525.1	0.00103242219829798	0	0.00258889741322956	0	0	0	0	0	0	0.00380923022994058	0	0.00241296197059153	0	0	0	0	0	0
si:dkeyp-100h4.1	0.00499042792160143	0	0.00332959423412291	0.0294269633858444	0.0228287048134324	0	0	0	0	0.00837860119180728	0.00416253181945429	0.00355531516596414	0.00947524027928938	0	0	0	0	0
si:dkey-7j22.1	0.00243649876820167	0.00244103681490008	0.00241127747928667	0.00326357762517289	0	0	0	0	0	0.00219296491264621	0.00859943412850559	0.00259392479115869	0.0130186397098606	0	0	0.000578518497434733	0	0
si:dkey-7j22.2	0	0	0	0	0	0	0.366501740883269	0	0	0.000751123831476655	0.00854564533215856	0.000799695731767977	0	0	0	0.00814685189349132	0	0
znf1115	0.0055813599313813	0.00134197025388735	0	0	0	0	0.0674036128336479	0	0	0.000642373231180129	0.0036423701962146	0	0	0	0	0	0.00450254528885179	0
si:dkey-7j22.4	0.000324733618577179	0	0	0	0	0	0	0	0	6.61335981216788e-05	0	0	0	0	0	0	0	0
BX897720.1	0	0	0	0	0	0	0	0	0	0.000297601191547555	0	0	0	0	0	0	0	0
si:dkey-16p6.1.4	0.00675232265738139	0.0142885784160512	0	0.00683251243486789	0	0	0	0	0	0.00226712245152472	0.0139161770186237	0.00504018859786775	0.0167246008841168	0	0	0	0	0
si:dkeyp-77c4.5	0	0.00993068382688832	0	0	0	0	0	0	0	0	0	0	0	0	0	0	0	0
znf1137.1	0.00057717252644922	0	0	0	0	0	0	0	0	0	0	0	0	0	0	0	0	0
BX649307.1	0.000398323694563798	0	0.00118931208048503	0.0159334662229386	0	0	0	0	0	0.0013646928840546	0	0	0.00510841330128655	0	0	0.00347671297648351	0	0
znf980	0	0	0.00338298992934127	0	0	0	0	0	0	0.000369443859902159	0.00161713382038183	0	0	0	0	0	0	0
si:dkey-51d8.1	0.0144010591571164	0.0233462128181093	0.00307468281572073	0.000801427695353611	0.0189118142103372	0	0	0	0	0.00392596726036088	0.00336510667051635	0.00176815379201449	0.00733163289688295	0.0296953553494698	0.00607275156373353	0	0	0
si:ch211-227e10.6	0.00672562955746675	0.00938092919874898	0.0130320424941785	0.00809866654319532	0	0	0	0	0	0.00294770491253927	0.0149644906208753	0	0	0	0	0	0	0
BX649516.1	0	0	0	0	0	0	0	0	0	0.00166170377449289	0.000348433464051632	0	0	0	0	0	0	0
BX649516.3	0.000703522059898977	0	0	0	0	0	0	0	0	0	0	0	0	0	0	0	0	0
si:dkey-51d8.3	0.00104619615110713	0	0.00151815447069924	0.00302894826435207	0.0531363745051675	0	0	0	0	0.00152781304616991	0	0	0	0	0	0	0	0
si:dkey-51d8.6	0.00183970275803902	0.0278916960216226	0.00189869601435757	0.00586012283826515	0	0	0	0	0	0.00469406205608783	0.0402846553465851	0.00784745077606578	0.00291124628998051	0	0.0708892900959707	0.00233395402801161	0	0
BX649516.2	0	0	0	0	0	0	0	0	0	0.000825031318188838	0	0	0	0	0	0	0	0
si:dkey-51d8.9	0.00414683631969175	0.00799283841677857	0.0157068630930061	0.00710491183870145	0	0.0461457453167069	0	0	0	0.00288455074835201	0.0137041605188242	0.0172884365787116	0.00781181785206425	0	0	0.0162069391162207	0	0
BX649516.4	0.000387860009996656	0.00231521676216936	0	0	0	0	0	0	0	0.00632264646728293	0.00591427189705106	0	0	0	0	0	0	0
znf1021	0	0.0101508415047607	0	0	0	0	0	0	0	0	0	0	0.00307329186438178	0	0	0	0	0
znf1115.1	0.00181512472322306	0	0.00226555575895212	0.00215856890335418	0	0	0	0	0	0.00192495623592743	0	0	0	0	0	0	0	0
si:ch211-162i8.2	0	0	0	0	0	0.00690202574455603	0	0	0	0	0	0	0	0	0	0	0	0
si:ch211-162i8.5	0	0.0122274800386388	0.00737998121056784	0	0	0	0	0	0	0.00158619313228162	0.0156480539839856	0.00916817383450552	0.00485354430072561	0	0	0.00942587393245151	0	0
si:dkey-16p6.1.5	0.00316677632914166	0	0.00124407865214528	0.00480195305034464	0	0.0139063684214186	0	0	0	0.00156697975155389	0.00213989338199705	0.00241693114023965	0	0	0	0	0	0
si:ch211-162i8.4.1	0	0	0	0	0	0	0	0	0	0	0	0.00104202938934835	0	0	0	0	0	0
BX649518.1	0	0.000991647354334441	0	0	0	0	0	0	0	0.000756748379347671	0.00210301934693678	0	0	0	0	0	0	0
si:ch211-162i8.7	0.00249923501598155	0.0041483620192567	0.00185106680294054	0	0.0237025800258358	0.0111474642305742	0	0	0	0.00115879474222379	0.00102057062144586	0	0	0	0	0	0	0
si:dkey-256i11.3	0	0.000788130129741982	0	0	0	0	0	0	0	0.0014623936693563	0.00037640931411297	0	0	0	0	0	0	0
si:dkey-256i11.2	0	0	0.000800375728381931	0	0	0	0	0	0	0.00122352775352474	0.00677276728903138	0.00243993609319385	0	0	0	0	0	0
znf1038	0	0.016300074897706	0.00117400738262802	0	0	0	0	0	0	0	0	0	0	0	0	0	0	0
BX927193.2	0.00246960004515934	0	0.000632924611716574	0	0	0	0	0	0	0.000247725827359673	0	0	0	0	0	0	0	0
si:dkey-16p6.1.6	0	0	0	0	0	0	0	0	0	0.001369334271913	0.000494244473679554	0	0	0	0	0	0	0
BX927336.3	0.000905595731732349	0	0	0	0	0	0	0	0	0	0	0.000804270353870913	0	0	0	0.00542714920535681	0	0
BX927336.1	0.00809325087666731	0.0183150183150183	0.0328818054125518	0.0221015228282513	0.0215658999989217	0	0	0	0	0.00424815055562413	0.000493935362828124	0.022354671026652	0.0384103428702981	0	0	0.0154025970919825	0.0124795445204914	0
si:ch211-215p11.3	0.00440863467061717	0.00531310104455567	0	0	0	0.00684643112661447	0	0	0	0.00276747963899887	0.000674569017854493	0	0	0	0	0	0	0
si:dkey-26m3.3	0.14571338173123	0.0923639274295815	0.0308310426988955	0.050942977017243	0	0.103455837886122	0.0674036128336479	0.0668914218440627	0	0.148124641584627	0.064276734617182	0.0323219154065121	0.0463513865968487	0.0609041012884317	0.0885179602918041	0.0143469817470155	0	0.0810279217933426
BX927336.2	0.00361101818624409	0.0022979947697639	0.0154170903242428	0	0	0	0	0	0	0.00132745108870629	0.00735996823916719	0.00187531517015578	0.0224780191085535	0.0217521344281908	0	0.0440923471921939	0	0
si:ch211-215p11.1.1	0.00685374410320513	0.0186619935170643	0.0172268430342753	0.0116493328483477	0	0.0743192710759118	0	0	0	0.00646738190969047	0.0100011037489564	0.010025778230668	0	0	0	0	0	0
si:dkey-31n13.4	0.000369862503842152	0	0.000715117804931595	0	0	0	0	0	0	0.00111118222677362	0.00198088760404117	0	0	0	0	0	0	0
BX942815.1	0	0	0.00149980847445781	0	0	0	0	0	0	0	0	0	0	0	0	0	0	0
si:dkey-26m3.1	0	0	0	0	0	0	0	0	0	0	0.000605504862688451	0	0	0	0	0	0.00470295656067143	0
crestin	0.00425980114312573	0.0203130805176347	0.00314776978315981	0.00429405698471425	0	0.011215728938263	0	0	0	0.00259618226549291	0.00343734871691538	0.000804270353870913	0	0	0	0	0	0
znf1122	0.0230495275383903	0.0053821961417433	0.002382107748106	0	0	0	0	0	0	0.00278961454858774	0.00685834708661243	0	0	0	0	0.0122859826109319	0	0
si:dkey-124l13.1	0.00415580615990212	0.00725991715518503	0.0215072542446326	0.00624898454001225	0	0	0	0	0	0.00154100837755189	0.00902080394745978	0.0039563516812024	0	0	0.0126438568727322	0	0	0
BX324142.1	0.00262453562179054	0.00171740825850593	0.00782133503919982	0.0124649496721691	0	0	0	0	0	0.00430006786261667	0.00602186374887835	0.00561355738829619	0.0180286351453374	0.0310505005340686	0	0	0.019188848976083	0
znf1040	0.00103107930804268	0.000762399668203664	0.00966796696701906	0	0	0	0	0	0	0.000463707838292327	0.0108561578514419	0.00742535300905905	0	0.0708367352682662	0	0	0	0
si:ch211-196f19.1	0.0371793968025873	0.0470418321998909	0.0340413638525278	0.0791159107786198	0.112604147610723	0	0	0.144375144375144	0.0972989803066864	0.0641077144876879	0.00993708301482553	0.0423527574255028	0.0983371696157069	0.0574262217449286	0	0.00348567110322885	0.0132698503691672	0
si:ch211-196h24.2	0.00207105303255853	0.00167238622756494	0	0.00653402594008298	0	0	0	0	0	0.00482252059675037	0.00247128403932089	0	0	0	0	0.000578518497434733	0	0
si:ch211-196h24.1	0.0232450320681156	0.00474868733891791	0.00631459476475231	0.00675688458970845	0.0264082182375155	0	0	0	0	0.0187660201774893	0.0286218942879222	0.00250054543854673	0.0040887754935152	0.00739693663266295	0.00650596922676556	0.0125878914351379	0.0206014557337378	0
si:dkey-28k24.2	1.09269878952506	0.476969424657686	0.0919280560548423	0.117945691040363	0.0627458201198962	0.233493674132275	0.310655483069276	0.114632959313281	0.0630859103927729	1.0743456511207	0.344128773656103	0.0588408314509608	0.0888150098413666	0.212530859224416	0.332256796612843	0.0689475953335836	0.112816156482612	0.0647669957995363
znf980.1	0	0	0	0	0	0	0.188058298072402	0	0	0	0	0	0	0	0	0	0	0
znf1063	0	0	0.00516146880950206	0	0	0	0	0	0	0.000124753512010969	0	0	0	0	0	0	0	0
CR356223.2	0.00654056415526735	0.00269678435433589	0.0214742940317441	0.0164690025519642	0	0	0	0	0	0.00475985611212474	0.00317068897273852	0.00186205825285859	0.00273081906821723	0	0.0879507475813544	0	0	0
znf1023.1	0.00162312762084388	0	0	0	0	0	0	0	0	0	0	0.000532121600215233	0	0	0	0	0	0
znf1020	0.00337590272407291	0.000982979706383962	0	0	0	0.00732077819872253	0	0	0	0.00391229499441019	0.00509582730118493	0.000639344901639984	0	0	0	0	0	0
znf1113	0.00223161488548246	0.0257736653381092	0.00163670604949039	0	0	0	0	0	0	0.00424007719343538	0.00247157930951983	0.00354311481224708	0.00737025585843213	0	0	0	0	0
znf1064	0.000814614377438701	0	0	0	0	0	0	0	0	0	0	0	0	0	0	0	0	0
si:ch211-234c11.2	0	0	0	0	0	0	0	0	0	0	0.00109478998205858	0.00103681158043885	0	0	0	0	0	0
si:ch211-234c11.3	0.00709008784513195	0	0	0.00527684157813446	0	0	0	0	0	0.00866660051029593	0.000634819789262684	0.00243068249824259	0	0	0	0	0	0
zgc:173705.1	0	0	0	0	0	0	0	0	0	0.00102744170851743	0.00171687967420491	0.000345411617698698	0	0	0	0	0	0
znf1036	0.00315883270603939	0.0261095509818302	0.00916846617939323	0.00690214007755244	0	0	0	0	0	0.000990172542856999	0.000674596594514451	0.00193928501140544	0	0	0	0	0	0
si:ch211-42i6.2	0.000924095873837995	0.00474833808167141	0.00468657806222182	0.00427992965507619	0	0	0	0	0	0	0	0	0	0	0	0	0.00719086644907105	0
BX942819.3	0.000233886604570397	0	0.0022426965465613	0	0.0169396778073281	0	0	0	0	0.00134934848057964	0	0.00164193703724675	0	0	0	0	0.0301886085974578	0
BX942819.1	0.0016505994564576	0	0	0.00536394525278597	0	0	0	0	0	0	0	0	0	0	0	0	0	0
CR293498.1	0	0	0	0.00620732464307883	0	0	0	0	0	0	0	0	0	0	0	0	0	0
si:dkey-5i16.5.1	0.000357532388680324	0	0.000912411006851933	0	0	0	0	0	0	0.000355521923993629	0.000479584288665236	0.00118438604921148	0	0	0	0	0	0
si:dkey-159n16.2	0.0218298218566079	0.00926476003938226	0.0039095321608989	0.0163923432005114	0.031281770548213	0.00815078960774325	0	0	0	0.00876733242904779	0.00527432096259848	0.00707210235739763	0.0159635552379823	0.0229240023474178	0	0.00269111490737721	0	0
znf1057	0	0.0166346632981884	0	0	0	0	0	0	0	0	0.000532490039507566	0.000864450676173319	0	0	0	0	0	0
znf974	0.00161283767175915	0	0.0042617879990607	0	0	0	0	0	0	0.00509314860591026	0	0	0	0	0	0	0	0
BX465205.2	0	0.00747769776641168	0.00141145202774491	0	0	0	0	0	0	0.00280807641121588	0.00068627044764923	0	0	0	0	0	0	0
si:ch211-197e7.1	0.00308903587058289	0.00383216643865276	0.00265745098099139	0	0	0	0	0	0	0.00223560765156478	0.00221973744804436	0.00120361247433597	0.0075918615244458	0	0.00799888015677805	0	0	0
si:dkey-156k2.3	0.016610820952521	0.00621422283622399	0.00608282504753819	0.00715219044170737	0	0	0	0	0	0.0064707221298815	0.00877771048931059	0.00418364021570765	0.0142407541903419	0	0	0.00159311874661064	0.0152999244183734	0
si:dkey-156k2.4.1	0.0143964724910291	0.0192965360478118	0.0136989242802908	0.00715954399432391	0	0	0.0674036128336479	0.0523516354650919	0	0.0249493580285586	0.0247366596701455	0	0.00278427829418406	0	0.031417527143874	0.0453884885507595	0	0.0587168029875109
si:dkey-16p19.5.2	0.00200244629030313	0.00654216512999165	0.00302535234602109	0	0	0	0	0	0	0.000200526969023514	0.00609862778817003	0.000844800728826485	0	0	0	0	0	0
CR356227.1	0	0	0	0	0	0	0	0	0	0	0	0.000961616315474772	0	0	0	0	0.0077213041591577	0
si:ch211-152l15.2	0.00133852922207771	0.0115031660692051	0	0	0	0	0	0	0	0.000208557880651501	0	0	0	0	0	0	0	0
si:dkey-16p6.1.7	0.0011346470958197	0	0.00184750474162092	0.00168845533858342	0.032249742002064	0.00815078960774325	0	0	0	0.00178726920992692	0.00314771169150559	0	0	0	0	0.00348567110322885	0.0156994250870533	0
znf1135	0.000192783838730304	0	0	0	0	0	0	0	0	0	0	0.00110360853504354	0	0	0	0	0	0
znf1066	0.00066438209153718	0.000762399668203664	0	0	0	0	0	0	0	0.00027742276635341	0	0.000757349814880985	0	0	0	0	0	0
si:dkey-156k2.7	0.00110095938942752	0	0	0	0	0	0	0	0	0	0	0	0	0	0	0	0	0
znf1110	0.00152408915621549	0	0	0	0	0	0	0	0	0.00165856702666819	0.00040278306989978	0.00165333144633104	0	0	0	0	0	0
si:ch211-245n8.4	0.00127775323366315	0	0.00267005764881786	0	0	0	0	0	0	0.00252514142932064	0.00156078974992368	0.00726920913787979	0.00700932941745463	0	0	0.00198349415503942	0.0163791310215828	0
si:ch211-208f21.2	0.0022502422293725	0.00513951205472553	0.0135894121406514	0	0	0	0.366501740883269	0	0	0.000412211689915112	0.00694766962911257	0.000697962446999061	0	0	0	0	0	0
si:ch211-208f21.3	0.00570663582740768	0.0084909869797725	0.00494484263536343	0.00778536784634629	0	0.00910709488226803	0	0	0	0.00276861889217761	0.00678152698132771	0.00246914454117718	0.00596546591780185	0	0	0.000578518497434733	0.0338278971902549	0
si:dkey-156j15.1	0.000676929092219133	0.00467049647377516	0.00140524614923911	0	0	0	0	0	0	0.000806548398711071	0	0.000406356636870566	0	0	0	0.000578518497434733	0	0
znf1026.1	0.00873745283621204	0.00430002107010324	0.00267621253837689	0	0	0.0674172453313558	0	0	0	0.0102938634548721	0.00714483364538017	0.00220127418940636	0	0	0	0	0	0
BX005380.2	0.000285279853402671	0	0	0	0	0	0	0	0	0	0	0	0	0	0	0	0	0
znf1141	0.000890317812445762	0.00474394553950521	0.00145260646074846	0	0	0.0369289855607666	0	0	0	0.00132827025397859	0.00181566502927139	0.00862100162108214	0	0	0	0.0118094428304873	0	0
BX005380.1	0.00408216456428705	0.0089017418620359	0.00626662949740019	0.00302894826435207	0	0.0559033989266547	0	0	0.106658702816856	0.00877769211374526	0.00782548829271953	0	0.0125965238486087	0	0	0.000922983659128105	0	0
si:dkeyp-82b4.3	0.00112461562043863	0	0	0	0	0	0	0	0	0	0	0	0	0	0	0	0	0
si:dkey-165e24.1	0.0100007231927193	0.00931384876172381	0.00157619119073048	0.00877980854749481	0	0	0	0	0	0.00178947182556527	0.007086739881589	0	0.00591833292398197	0	0	0	0	0
si:dkeyp-90h9.1	0.0197670326032141	0.00770719824273249	0.0125191386331855	0.019100624507394	0	0.0102982899689507	0	0	0	0.0186827827423303	0.0236028522689937	0.00212491676519136	0.00758025239901645	0	0.00613788764596664	0.00182874464726442	0	0
BX321870.2	0	0	0	0	0	0	0	0	0	0	0	0.000305316923240761	0	0	0	0	0	0
BX321870.1	0.000260617097503215	0.00467049647377516	0.00094488629427312	0.0141153400383414	0	0	0	0	0	0.000897533291304841	0.00344875393071729	0.00152010505500121	0.00793219559207891	0	0	0	0	0
BX908721.1	0.010241472866018	0.00461187634298598	0.00804612303108739	0	0	0	0	0	0	0.0149106938600611	0.000371425383537565	0.0014806261805778	0.0120775142740636	0	0	0.0024967068436732	0	0.039579977281093
si:dkey-22a18.2	0.0862359321863665	0.0326624363242297	0.0160401167199435	0.0441360889921714	0.0659816246974283	0	0	0	0.0527339939144971	0.085120616142183	0.0107481267571187	0.0153939784533187	0.0378643736306012	0.0950837813838218	0.0879507475813544	0.0042355795458781	0.017746838965541	0.0587168029875109
BX649431.1	0.00334069968650501	0	0	0.00404649585598359	0	0	0	0	0	0	0	0	0.00352777238812552	0	0	0	0	0
si:dkey-16b10.1	0.00269713775348169	0	0	0.0074997881309853	0	0	0	0	0	0.00198363246637147	0.000878707374538028	0	0	0	0	0	0.0155209128780118	0
BX649431.4	0	0	0.00168167533878611	0	0	0	0	0	0	0	0	0.000373427789652159	0	0	0	0	0	0
znf1034	0.00177772254391791	0.00441384701575423	0.00501057631895606	0.00619081580094298	0	0	0	0	0	0.00641660142002098	0.00850062988304427	0.00621974017677519	0.00534155220165428	0	0	0.0034508436446414	0	0
zgc:173705.2	0.000195423654837425	0	0.00103794692437643	0	0	0	0	0	0	0.0029216637090972	0	0.000406356636870566	0	0	0	0	0	0
si:dkeyp-107f9.4	0	0	0.00579729628898622	0	0	0	0	0	0	0	0.000651538294945131	0	0	0	0	0	0	0
si:dkey-78o7.3	0.0673727960982514	0.0400212214537434	2.48335042904627	5.20635403230665	0.0263092121706416	0.0234093356430544	0.188058298072402	0.349659935225441	0.360509760801774	0.0655556463228415	0.0603763645284841	2.71088854165803	3.09970758682694	0.105794661830078	0.0376020074723459	0.183389214215265	2.14924103148334	0.326944483816871
si:dkeyp-44b5.5	0	0.000671336483244113	0	0	0	0	0	0	0	0	0.0018995264480565	0	0	0	0	0	0	0
BX640547.1	0.00217805737165297	0	0.00718227798232337	0.0111652737816284	0	0	0	0	0	0.010405433407754	0.00580381031754968	0.00703008942289098	0.00297641193541186	0	0	0	0.00454120851549256	0.0367157066121316
si:dkey-4j21.2.1	0.00756992620228362	0	0	0	0.0257052888631836	0	0	0	0	0.00304914835116492	0	0	0	0	0	0	0	0
BX640547.2	0	0.00795563935495676	0.00198231536813777	0	0	0	0	0.115901715345387	0	0.0013978084599841	0	0.000305862076084721	0	0.034854013962518	0	0	0	0
BX571954.3	0	0	0	0	0	0	0	0	0	0.000978655906149248	0	0	0	0	0	0	0	0
si:dkey-201g16.1	0	0	0	0	0	0	0	0	0	0.000959102341590821	0.00890237071388159	0	0.00494213989715407	0	0	0	0	0
si:ch211-171l17.14	0.0129082641316988	0.0252093636043671	0.0232589491979807	0.0337510142050347	0	0.0158852181914878	0	0	0	0.0077761942408735	0.014128824994461	0.0100327639044667	0.0307123209252459	0.0701269306002191	0.0773176906503761	0.0181075536688233	0	0
BX649421.1	0.00133745715957536	0.000935701406452784	0.00523310266217458	0	0	0	0	0	0	0	0.000221422973855792	0.0016978323644839	0	0	0	0.00775820495780311	0	0
si:ch211-207e19.2	0.0096434326395726	0.0030366500318685	0.0333417756787958	0.0149649494072848	0.0189118142103372	0	0	0.0219900077404827	0	0.000903865872769824	0	0.0103025537892548	0.0075491390516491	0	0	0.00329767882982526	0	0.032678029906933
znf1053.1	0	0	0	0	0	0	0	0	0	0.00156354030012963	0.00448729914849011	0	0	0	0	0	0	0
znf1037	0.000285279853402671	0	0	0	0	0	0	0	0	0.000647887601349057	0	0.00106565103019149	0	0	0.00631014355576589	0	0	0
si:dkey-250k10.1	0.016276842831383	0.011794400018871	0.00624044099532553	0.00532512837553231	0	0	0	0	0	0.00287402361290786	0.0049550870906107	0.00459890661144923	0.00405996569328989	0.0210185152100485	0	0.0042355795458781	0	0
si:dkey-250k10.4	0.00612530317831984	0.00645869663501905	0.00627745282360162	0.0109522633506794	0	0.0092167597559402	0	0	0	0.00456853587233067	0	0.00196827953869007	0.00268321314774442	0	0	0.00697134220645769	0	0
CR388042.1	0.00701488160544992	0.00474502426346223	0.0139946009389698	0	0	0	0	0	0	0	0	0	0	0	0	0	0	0
BX936303.2	0.00805409132990256	0.00468671643959525	0.000700348822738141	0.00473480140585723	0	0	0	0.0523516354650919	0	0.000298325582039177	0.00330551849702041	0.000305862076084721	0	0	0	0	0	0
znf995.1	0	0.00364529793019984	0	0	0	0	0	0	0	0	0.00138050271811158	0.000647962159009914	0	0	0	0	0	0
si:ch211-223g7.6.1	0.024200514896297	0.00745595395202839	0.0274428795612325	0.0710985844745818	0.0189118142103372	0	0	0	0.0749788184837783	0.0180702900105379	0.0205073695675231	0.0414947024410435	0.0616245515463794	0	0	0	0	0
zgc:174944	0.00251808053098532	0.00770538324205032	0.004657119571545	0.00586683563850482	0	0	0.0674036128336479	0	0	0.000693101752327574	0.00661349719560065	0.00868585254848546	0.0073372205821004	0.0256595136495783	0	0	0	0
si:ch211-223g7.2	0.0104799486518236	0.01883402697	0.0341504166951576	0.00737816461966558	0.0254504733788048	0	0	0	0	0.0107921103280072	0.0259897552526598	0.00616420672884776	0.00673438068906854	0	0.0247463499133878	0.047741299648836	0.0170280008445888	0
BX572628.1	0	0	0	0	0	0	0	0	0	0.00147437129859085	0	0	0	0	0	0	0	0
si:ch211-227e10.6.1	0.00978508261703403	0	0.00177417297370374	0	0	0	0	0	0	0.00606474087986771	0.000791347344823908	0.00382081073341707	0	0	0	0.00674359762841159	0.00896115161551641	0
si:ch211-227e10.3	0.0165575303161362	0.0420166762664857	0.0273404284852965	0.0436015727148749	0.0271105114956202	0.0537389005191377	0	0	0	0.0207878057575091	0.0365229276011042	0.0132193680870574	0.0314841177232783	0	0	0.0842062977036804	0.0142770460791662	0.0021316843759899
si:ch211-227e10.1	0.0189137912933918	0.0116447933054068	0.0239256685133933	0.0033845826843396	0	0	0	0	0	0.0130185125972096	0.00560280170352717	0.0134741337630834	0.0342452600726523	0.0375787274339742	0.0149074991461029	0	0.0431552829316037	0.0367157066121316
CR388413.1	0	0	0	0	0	0	0	0	0	0	0	0	0.00373411600404778	0	0	0	0	0
CR388413.4	0.000194688906110204	0	0	0	0	0	0	0	0	0	0	0	0	0	0	0	0	0
CR388413.2	0	0	0	0	0	0	0	0	0	0	0	0.0011664028846543	0	0	0	0	0	0
si:dkeyp-82b4.6.1	0	0	0.000632924611716574	0	0	0	0	0	0	0	0	0	0	0	0	0	0	0
si:dkey-56m15.9	0.0385349019080625	0.0116195113986469	0.00234396297101057	0.00964543092657295	0.0256864709357581	0	0	0	0	0.0148982164037635	0.00587740532826982	0.00560766687462077	0.00655348793011361	0.0295210795268361	0	0	0	0
si:dkey-56m15.2	0.0152378641203322	0.029510042277512	0.00364672239168729	0.00795128770661581	0.0193037149999517	0	0	0	0	0.00940117997739517	0.00636525534683713	0.00754282318540238	0	0	0.0134072497107312	0	0	0
si:dkey-56m15.8	0	0	0	0	0	0	0	0	0	0.00350474547656943	0.00245783571559358	0	0	0	0	0	0	0
si:dkey-56m15.6	0.000252084054503799	0	0	0	0	0	0	0	0	0.000171741112775244	0	0	0	0	0	0	0	0
si:dkey-56m15.5	0.00211496425658158	0.00421935587313241	0	0	0	0	0	0.0611845325501713	0	0	0	0.00269544757772256	0	0	0	0.00120158570862796	0	0
BX005245.1	0.0100647483129423	0.0606089865173199	0.0471982516950621	0.127602986791487	0.0913671394585592	0.0840123320870065	0	0.0402149084708683	0	0	0.00834423686930451	0.00760379522964605	0	0.0296953553494698	0.00797352788741379	0.000578518497434733	0.0314492852465316	0
BX465836.1	0	0.00597692905385213	0	0.00561579430917868	0	0	0	0	0	0.00640690444149099	0.00404910998254396	0.00186792341953342	0.016464402647162	0	0.00796923873846951	0.000578518497434733	0	0
znf1039	0	0	0	0	0	0	0	0	0	0	0	0.00151397828561498	0.00299385959397276	0	0	0	0	0
si:dkey-191j3.2	0.00355061576261356	0.0201822679442078	0.00442254024032353	0.0209846257168347	0	0	0	0	0	0	0	0.000644041903942438	0.00347163758880883	0	0	0.0134202968569665	0	0
si:dkey-61p9.9	0.0124641648805356	0.017205999380845	0.00529958311558006	0.00526193103397471	0.021998570092944	0	0	0	0.0757363466301113	0.00665388898106096	0.00338310478535995	0.00301174268115267	0.00421374650522399	0.00580972117405169	0	0.00785289708588077	0	0
BX546503.1	0.000896625049516118	0.00140444901358524	0	0	0	0	0	0	0	0.000695864781782372	0	0	0	0	0	0	0	0
si:dkey-157e10.6	0.00262733129084201	0	0	0	0	0	0	0	0	0	0.000493935362828124	0	0	0	0	0	0	0
CT027586.1	0.00156495722737154	0	0	0	0	0.00690202574455603	0	0	0	0	0	0	0	0	0	0	0	0
znf569l	0	0	0	0	0	0	0	0	0	0.00122352775352474	0.00163980775575316	0	0	0	0.0367107195301028	0	0	0
CR762475.1	0	0	0.00791514333137302	0	0	0	0	0	0	2.39852461186547e-05	0	0	0	0	0	0	0	0
znf1029	0.00060750724707563	0	0	0	0	0	0	0	0	0.00474018371176747	0.00737829451230229	0.00742714751621408	0.00780545679484528	0	0	0	0	0
CR762475.2	0	0	0	0	0	0	0	0	0	0	0.00303038384053878	0	0	0	0	0	0	0
znf1078	0	0	0	0	0	0	0	0	0	0.00239101421577607	0	0	0.00427547757084466	0	0	0	0	0
CR762475.4	0.000771172225958314	0.00268282221717301	0	0	0	0	0	0	0	0.00130737607135202	0.000304702194739439	0	0.00868311828143723	0	0	0	0	0
znf1074	0	0.00121792740421914	0	0	0	0	0	0	0	0.000447794330945253	0	0.00237025310472359	0	0	0.00714043449543905	0	0	0
CU278559.1	0.0247137313021945	0.0260905018733773	0.00175129845645808	0.00428682641096604	0.031281770548213	0	0	0	0	0.00292564770836366	0.0211640045799517	0.0036704869117476	0	0.0822212903809312	0	0	0	0
CT583728.23	0.0186574110232856	0.00634429130810813	0	0.00638613646407287	0	0.0271909073605786	0	0	0	0.0117454004693441	0.00790391826720738	0.000501771982668194	0.00243730044602598	0	0	0.0175583409700835	0.0132073876843751	0.0231579777558614
CT583728.19	0	0	0	0	0	0	0	0	0	0	0	0	0	0	0	0	0.015233011764455	0
CT583728.3	0.00800981720346009	0.00591693576126997	0	0	0	0	0	0	0	0.00183348539093134	0.0025823520964534	0.00223864988502847	0	0	0	0	0.00450254528885179	0
CT583728.4	0.00853202928985549	0.0032036800155354	0	0	0.0547211143147912	0	0	0	0	0.00134671534139155	0.00246666165786882	0.00635951814492593	0.0054319337955909	0	0	0	0	0
AL772298.1	0	0	0	0	0	0	0	0	0	0.00132972499159614	0	0	0	0	0	0	0	0
znf1133	0.00229650971914407	0.00701724839655874	0.00364097412387212	0.00590986160877071	0	0.0113380613048975	0	0	0	0.00974872520030438	0.00976038385352289	0.00638811069002066	0.00207114378915756	0	0	0.0251513829696773	0	0
znf986	0.0068003695769648	0.00990922713663046	0.00451583715912617	0.00562427482006539	0	0	0	0	0	0.00193326677275478	0.00756900654858722	0.00157617917054846	0.00971878355920053	0	0	0.00195881504034401	0.00777658795981993	0.0021316843759899
si:dkey-16p6.1.8	0.0167553915557396	0.0836466789428132	0	0.00151299755681155	0	0.0518524279899406	0	0	0	0.0418872441378785	0.0114411738823422	0.00125754195065632	0	0	0.00613788764596664	0.00649991664705418	0	0.0194196627969752
si:ch211-207e19.2.1	0.00841525971481344	0.00371339980318981	0	0	0	0	0	0	0	0.000200576923416361	0.000304702194739439	0.000757349814880985	0	0	0	0	0	0
si:ch211-207e19.15	0.000449984840707443	0.0010409640159559	0.00247302345426223	0.00441592931686898	0	0	0	0	0	0.00204291533159805	0	0.000692685552276459	0	0	0	0.00290816029779561	0	0
znf972	0.004502905976209	0.000476395326180734	0	0	0	0	0	0	0	0.00235031704446231	0.00850685600125992	0.000563530577676322	0	0.0312087459389619	0	0	0	0
CT025669.1	0	0	0	0	0	0	0	0	0	0	0.00237002318830687	0	0	0	0	0.00292568068886907	0	0
zgc:174275	0.000264273549377476	0.00269678435433589	0.000520343018443246	0	0.0247386975075762	0	0	0	0	0	0.00249500375498065	0	0	0	0	0	0	0
si:ch211-237a4.2.1	0.00291287618086218	0.00172969681874161	0	0.00345555277959482	0.0304053026847882	0	0	0	0	0.000663800528490568	0.000471263217283824	0	0	0	0	0	0	0
si:dkey-41c6.3	0.00462601339594521	0.00747454840551717	0	0.0114905297427185	0.0296850417074836	0	0	0	0	0.0055260884005311	0.00510944683397287	0.000305862076084721	0	0	0	0	0	0
znf1118.1	0	0	0	0	0	0	0	0	0	0.00102918861239851	0	0	0	0	0	0	0	0
si:ch211-227p7.5	0.0449900117656011	0.0123055075834313	0.00552789458526142	0.00332535248736366	0.0182431816108729	0.0140846062296213	0	0	0	0.0307228150594713	0.00802453592205669	0	0.00273081906821723	0	0.0729507858471279	0.0567551820833022	0	0
BX649355.1	0.000897394180768162	0.000798338179246081	0.000715117804931595	0	0	0	0	0	0	0	0	0	0	0	0	0	0	0
si:dkeyp-33c10.7	0.00656265198119619	0	0.0415504630708967	0.0381997398122051	0.00618394770853818	0	0	0.0552095755487832	0	0.00152147353583244	0	0.0196857746237482	0.0285954877048613	0.0278064524597826	0	0	0.0112784838108643	0
si:dkey-269o24.6	0.000323316116319051	0.00226510913832391	0.00233211348250775	0	0	0	0	0	0	0.00234312525910619	0.00275267544033037	0.00258375859965703	0	0	0	0.0159144320343657	0	0
BX957361.2	0.0153819540675305	0	0	0	0	0	0	0	0	0.00314912681497708	0.00175054398154226	0	0	0	0	0.0022637176763753	0	0
si:dkey-269o24.1	0.0214789928016547	0.0410359650001049	0.00671095675390283	0.0157697021713523	0	0	0	0	0	0.0847827268157428	0.0629984197423216	0.00486572704547466	0.00859761462934266	0	0	0.00421343580409209	0.0112784838108643	0
BX957361.1	0	0	0.000721767608874133	0	0	0.00968804495252858	0	0.0219900077404827	0	0.00118567574031792	0.00736365125676236	0	0	0	0	0	0	0
znf999	0.00154799542828787	0.00368794042954133	0.0017716477384555	0	0	0	0	0	0	0.000608602393869547	0.00299284040376187	0.00256388873352935	0	0	0	0	0.0196900781696103	0
si:ch211-161m3.1	0	0	0.00324912921531898	0	0	0	0	0	0	0	0	0	0	0	0	0	0	0
si:ch211-238e22.7	0	0	0	0	0	0	0	0	0	0.00142972664770277	0	0	0	0	0	0	0	0
si:ch211-238e22.5	0.0101718649474942	0.0121912187677438	0.00315328501417004	0	0.0191841002177395	0.010769015388923	0	0	0	0.00791112076812471	0.0208113088712276	0.00649897851172812	0.00833006806808842	0	0.0800096946885938	0.00538816328290013	0.0226378532071047	0.0436957899106421
si:ch211-238e22.4	0.000281613970215718	0.0144492535491667	0	0	0	0	0	0	0	0.00257207818443237	0.00778894817743874	0.00632523937268249	0.00700714378308686	0.0579033332019421	0	0	0	0
BX890548.1	0.0165782542395598	0.0151276740845477	0.00223129886469998	0.0174435264364389	0	0	0	0	0	0.00657582712279926	0.00970652607266687	0.00243981605230104	0.00960748615321058	0	0.00714043449543905	0.00779719799892711	0.0152307148688331	0
si:ch211-238e22.8.1	0.000409639355984682	0	0.00152611433434937	0	0	0	0	0	0	0.00625992189052169	0.00162606053804282	0.000473385733346929	0	0	0	0	0	0
si:dkey-16p6.4.1	0.00138954525602997	0	0	0	0	0	0	0	0	0	0	0	0	0	0	0	0	0
zgc:194906	0.00461475509856844	0.00421935587313241	0.0119684750419114	0.000801427695353611	0	0	0	0	0	0.0025120198021653	0.00617389883845425	0.0182230609693405	0.0200179315586191	0	0	0	0	0
BX511018.2	0.00105868917552781	0	0.00209528976081534	0.00957522088798149	0	0	0	0	0	0.00168678438172605	0	0.00534389270193219	0.0139257284899142	0	0	0	0	0
znf1069	0.00387894547291667	0	0	0	0	0	0	0	0	6.61335981216788e-05	0	0	0	0	0	0	0	0
si:dkey-40j3.3	0	0	0	0	0	0	0	0	0	0	0	0.00610033960590586	0	0	0	0	0	0
BX510934.1	0	0	0	0	0	0	0	0	0	0	0	0.000445947803860918	0	0	0	0	0	0
zgc:174703	0.00070113875864131	0	0.00137761312545702	0	0	0	0	0	0	0	0	0.00105000382380991	0	0	0	0	0	0
il17ra1b	0.0027812220167389	0.0199550867527731	0.00431195642482373	0.0446391639837723	0	0	0	0	0	0.00518718474884689	0	0.00148054139253209	0	0	0	0	0	0
il17ra2	0.00110886869551	0.0387135333452553	0.00642468803168294	0.0795983853135748	0	0	0	0	0	0	0	0	0	0	0	0	0	0
BX324181.1	0	0.0137706904624198	0	0	0	0	0	0	0	0	0	0.000504387235835382	0	0	0	0	0	0
FP236354.1	0.00530589237493704	0.0184981187662027	0.00114214405337559	0	0	0	0	0	0	0.010196835571588	0.0459318430261517	0.000980186750563958	0.00338585356521916	0	0	0	0.0181705524393058	0
zgc:174314	0	0	0.0014733279753306	0	0	0	0	0	0	0.00215596864444383	0.00774071898668388	0	0	0	0	0	0	0
si:dkeyp-44b5.4.1	0	0.000626598217077433	0	0	0	0	0	0	0	0	0	0	0	0	0	0	0	0
znf1097	0.000314979548535403	0.00294474918488711	0	0	0	0	0	0	0	0.00189037162938659	0.000261325098038724	0	0	0	0	0.00120158570862796	0	0
CT027609.1	0	0	0	0	0	0	0	0	0	4.69984796931789e-05	0	0	0	0	0	0	0	0
si:dkey-57k17.1	0.00267453894040592	0	0	0	0	0	0	0	0	0.00102479367256198	0.00303877944512895	0	0	0	0	0.00258593581914172	0	0
si:dkey-16p6.1.9	0.00796980643972115	0.0113963826461008	0.00468657806222182	0.0173438183089029	0	0.0559033989266547	0	0.0552095755487832	0	0.00724322278053974	0.0119513351665823	0.00513104718827205	0.0208943217501968	0.0529608803671527	0	0	0	0
si:ch211-196f19.1.1	0.00329514145627917	0.0086598032095507	0.00795067634581497	0.0238358006635222	0.024949788550542	0	0	0	0	0.00223137089267321	0.000791347344823908	0.00377600671749556	0	0.0286212295107773	0	0	0	0
CR388095.1	0.00166597088996388	0.00174630699727751	0	0	0	0	0	0	0	0	0.000494244473679554	0	0	0	0	0	0	0
si:ch211-212k5.1	0.00451066287832391	0.00323791206478414	0.00109542463040373	0	0	0	0	0	0	0.00447987184339775	0.00537028205346876	0.00498209237036559	0	0	0	0	0	0
si:ch211-212k5.4	0.000122974550736459	0	0	0	0	0	0	0	0	0	0.000428360332599524	0.00156858537598442	0	0	0	0	0	0
CR388148.2	0.0253605555287114	0.00262855248170286	0.00490567370598139	0.00506031900250992	0	0.0189354817186926	0	0	0	0.0254341822187382	0.0112383732649676	0.0079103660600998	0	0	0.0266423028325982	0.0019846373194377	0	0
si:dkey-28i19.1	0.00170471387607705	0	0.00271333678288883	0	0	0	0	0	0	0.000445998871990365	0.000913272468061554	0.000764419863419574	0	0	0	0.0101483691570765	0	0
si:dkey-25i10.1	0	0	0	0	0	0	0	0	0	0.000156958274212383	0	0	0	0	0	0	0	0
CR388148.1	0.000775719074893775	0	0	0.00338642915607138	0	0	0	0	0	0.0034114352549693	0.00242898624124287	0	0	0	0	0	0	0
CR388172.1	0	0.000762399668203664	0	0	0	0	0	0	0	0	0	0	0	0	0	0	0	0
si:dkey-29j8.1.1	0	0.0157888088922572	0	0	0	0	0	0	0	0.00271715502999739	0	0	0	0	0	0	0	0
si:ch211-64i20.3.1	0.00513194782000992	0	0	0.00566361737507193	0	0	0	0	0	0.000877458425081808	0	0.00130717741051031	0	0	0	0	0	0
BX469910.2	0	0	0	0.00151299755681155	0	0	0	0	0	0	0.000490045365459662	0	0	0	0	0	0	0
znf1132	0	0	0	0	0	0	0	0	0	0	0	0.00777014059292389	0.00408728812520181	0	0	0	0	0
znf993	0.000571606508194847	0	0	0	0	0	0	0	0	0	0	0.000951061241686536	0	0	0	0	0	0
BX927122.2	0.000258304642790897	0	0	0	0	0	0	0	0	0	0	0	0	0	0	0	0	0
BX927122.1	0.000516609285581794	0	0	0	0	0	0	0	0	0	0.00114907000019534	0.00225045575401766	0	0	0	0	0	0
si:dkey-105i14.1	0.00154226215794511	0.00661961807006643	0.00253235398763452	0.00782764772141088	0	0	0	0	0	0.00461175029287088	0	0.00441521994919034	0.00186783393835588	0	0	0.00726891251094593	0.0140116661132059	0
znf1084	0	0	0	0	0	0	0	0	0	0.000201912743650127	0	0	0	0	0	0	0	0
znf1050	0.00101985409514227	0.0262163144860083	0.00195453919389285	0	0	0	0	0	0	0.00152143869761692	0.00203833475463207	0.00649886749013777	0	0	0	0	0.0227500227500228	0
si:ch211-241n15.3	0	0	0	0	0	0	0	0	0	0	0.000766418367553403	0.00120253260385361	0	0	0	0	0	0
CR936371.1	0	0	0	0.00563960446070154	0	0	0	0	0	0	0	0	0	0	0	0	0	0
si:dkey-149m13.4	0.000865844195493073	0	0	0	0	0	0	0	0	0	0	0.00055723049755947	0	0	0	0	0	0
znf1068	0.000453665302616079	0.00198260462700268	0	0	0	0	0	0	0	0.00227859466625538	0.00335436045834242	0.00046865187601346	0	0	0	0	0	0
CR846087.1	0.00285784994166682	0.00831457957952604	0.0040941614281099	0.00401595297158432	0	0.0173975069372559	0	0	0	0.00661251500468934	0.0137490118149473	0.000373427789652159	0.00333213376517787	0	0	0	0	0
si:dkey-16p6.1.10	0.0143572146297523	0.0273008413626623	0.0249639317095909	0.0633235697126774	0.105467908056834	0.0555200843905283	0	0.232298053568364	0	0.0152405706159464	0.0178609586775156	0.0134133610929639	0.154439900533352	0	0	0.00571231412687635	0	0.0367157066121316
CR846087.2	0.00582855731387367	0.000762399668203664	0.0027154264148344	0	0	0	0	0	0	0.000212968377092372	0	0	0	0	0.0171732783788425	0	0	0
znf1109.1	0	0	0	0	0	0	0	0	0	0	0	0.000306358789154874	0	0	0	0	0	0
znf1033	0.00191468869523823	0	0	0	0	0	0	0	0	0.00127922910583932	0	0	0	0	0.00946902445375565	0	0	0
CR388052.1	0	0	0.00167648640637762	0	0	0	0	0	0	0.0008029507476435	0.00483150138905665	0.000413401654846824	0	0	0	0	0	0
znf1080	0	0	0	0	0	0	0	0	0	0.00178450082515318	0	0	0	0	0	0	0	0
si:dkey-51d8.1.1	0	0	0.00107860762972522	0	0	0	0	0	0	0	0	0	0	0	0	0	0	0
znf1121.1	0	0	0	0	0	0	0.188058298072402	0	0	0	0	0	0	0	0	0	0	0
CU138542.2	0.00160048552328834	0	0	0	0	0	0	0	0	0	0.00254258059726235	0	0	0	0	0	0	0
znf1130	0.00182222930306114	0.010797148703931	0.00295794151458946	0	0	0	0	0	0	0.00461034618073033	0.0158287622290483	0.00437282551434329	0.0021438570990612	0	0	0	0	0
si:dkey-16p6.1.11	0.00589294946341712	0.0105691106270497	0	0	0	0	0	0	0.060084960133629	0.00405518440370309	0.00342459654828065	0.000453561679263133	0	0	0	0	0	0
si:dkey-211i20.2	0.0137148375549495	0.0521459983800941	0.0430208225189741	0.117165685652396	0.0644493730590557	0.0465503835498945	0	0.0402149084708683	0.255996723241943	0.032680516379104	0.0685078268827383	0.0362731100160416	0.148552643541608	0.0811152187750165	0.0247463499133878	0.0222795377212795	0.104636641978585	0.134428546457027
si:dkey-211i20.5	0.00230735483782024	0	0.00487278410366364	0	0	0	0	0	0	0.00112287888179229	0.00617588918428336	0.00118325761470647	0	0	0	0	0.0112784838108643	0
CABZ01016118.1	0.00274492287529946	0	0	0	0	0	0	0	0	0.00478952550988162	0	0	0	0	0.00796923873846951	0	0	0
si:dkey-254e13.6	0.0337728338524098	0.0227749107854355	0.00885181141734638	0.0755889873676098	0.0274122807017544	0.117392559848694	0	0.0611845325501713	0	0.0405364389022521	0.049469041764623	0.0386324260769851	0.0960742684286166	0.0301595439876949	0.121721745842387	0.0100383575006666	0.0787031492397666	0.0266562174294343
CR388363.1	0.000332994256381868	0.00163704434916846	0	0	0	0	0	0	0	0	0	0.0079103660600998	0	0	0	0	0	0
si:dkey-196n19.2	0.00933617578886941	0.0772213246385831	0.0292953911567222	0.0280791724609757	0	0.00732077819872253	0	0	0.0612047543853207	0.0296604037814324	0.0384127331779806	0.0172240142358935	0.0230828702025825	0.0264101013355588	0.0912900074582038	0.0531767914628311	0	0
si:dkey-82i20.2	0.00354912529824934	0.00828552823849292	0.00875242855551549	0	0	0	0.0674036128336479	0	0	0.0100337182607322	0.0123942541006197	0.00883907451488631	0.0197116252992807	0	0	0.00362754145554375	0	0
BX000981.4	0.000278265887062117	0	0	0	0	0	0	0	0	0.000213110198431168	0	0	0	0	0	0	0	0
znf1021.1	0.00104957400415107	0.00122984438778961	0	0	0	0	0	0	0	0.000237421078366696	0	0.00307788716588765	0	0	0	0	0.00759988721767369	0
si:dkey-26i24.1	0	0.00717439377653202	0.0023450870660475	0.00193394681994356	0	0	0	0	0	0.000891551126900886	0.00385577773116451	0.00388739307900236	0	0	0	0.00362754145554375	0	0
znf1129	0	0	0	0	0	0	0	0	0	0.000720046082949309	0.000647225647843748	0.000303390123717031	0	0	0	0	0	0
znf1104.1	0.00179428944544533	0.00809120405207499	0	0	0	0	0	0	0	0.00126784640322135	0	0.000979245000146397	0	0	0	0.0121037826741613	0	0
znf1082	0	0	0.000871995354706346	0	0	0	0	0	0	0.00206941787855921	0.00556687002787056	0	0	0	0	0.00521243812835942	0	0
znf1077	0.00526680297777758	0.00483656786806401	0.00306248940513452	0	0	0	0	0	0	0.00778044524365277	0.00858031996275831	0.00776902753287202	0.00766436224841731	0	0.0965447732175588	0.00502746782247898	0.0284493947688412	0
CABZ01038376.1	0.000260617097503215	0	0	0	0	0.00927286805172406	0	0	0	0	0.00540081033758305	0	0	0	0	0	0	0
si:dkey-16p6.1.12	0.0775079066654249	0.114683509289984	0.0170477273379398	0.0127623271852328	0	0.0222844196029333	0.0674036128336479	0	0	0.0984433603778926	0.294967802365278	0.0316924884232208	0.0391255177723173	0.0312087459389619	0.15453296127768	0.0722512805103745	0.0777196459685853	0
si:dkey-146c18.5	0.00353831649633518	0.000991647354334441	0.0013811149381806	0	0	0	0	0	0	0.00545721095899662	0.00346408215009955	0.00227700168483471	0.0159750040517506	0	0	0.0121037826741613	0	0
znf1056	0.000785735876613695	0	0.00124407865214528	0	0	0	0	0	0	0	0	0	0	0	0	0	0	0
CT990567.3	0.000960974720502905	0	0	0	0	0	0	0	0	0	0	0	0	0	0	0	0	0
si:dkey-146c18.2	0	0	0	0.00206018076438063	0	0	0	0	0	0	0.000261325098038724	0	0	0	0.0712631391412792	0	0	0
CT990567.2	0	0.000941957519599781	0	0	0	0	0	0	0	0.00108658623995373	0.00745381818105624	0.00124019145235918	0	0	0	0.00138029654290928	0	0
si:dkey-27n6.1	0.02151914876992	0.00364529793019984	0	0	0	0	0	0	0	0.0539159707021943	0.0100734263199596	0.00141684228553662	0	0.0114387290199411	0.00714043449543905	0.00564772825253886	0	0
si:dkeyp-35e5.9	0.00182370600971611	0	0	0.00338642915607138	0	0	0	0.0402149084708683	0.05780848050409	0.00183089065984663	0.00528862990838088	0.00275865528460831	0	0	0	0	0.0118989399234422	0
si:dkeyp-35e5.5	0.034239019890844	0.00263664784085197	0.0269040084923427	0.0667882452351378	0.101468096089527	0.0092167597559402	0	0.108350791661641	0.0757363466301113	0.0257631367108009	0.0207967903740691	0.0357118467572469	0.0675054116711999	0.172045548731404	0	0.00946614716451028	0.0834393419675768	0.243825344596147
si:dkeyp-35e5.10	0.00106747601231537	0	0.0013857332663008	0	0	0	0	0	0	0	0.000222285884899657	0.00310853685972143	0	0	0.0171732783788425	0	0	0
znf1079	0.00170843067828969	0	0	0	0	0	0	0	0	0	0.00370781525884629	0	0	0	0	0	0	0
BX294383.1	0.000309727666374242	0	0	0	0	0	0	0	0	0	0.00235521794953738	0	0	0	0	0	0	0
si:ch211-79g12.1	0.00211705063529696	0.00323791206478414	0.00259123767485026	0	0	0	0	0	0	0.000793849674991538	0.00626193885606429	0.000453561679263133	0	0	0	0.000578518497434733	0	0
si:dkey-165b20.3	0.00194778814077854	0	0.00204285074553915	0.00864172927333342	0	0	0	0	0	0.00521150812173784	0.00188730523010025	0.00152576506554612	0	0	0	0.00120158570862796	0	0
si:dkey-51d8.1.2	0.00255565647131707	0.0247919807398876	0.0108303023920327	0.0403399974639078	0	0	0	0	0	0.00545741331149416	0.00940466504133129	0.0148835241929748	0.0263321733322234	0	0.0329788111138593	0.0135834034817668	0.0164401484389348	0.0404447302538716
si:dkey-28k24.2.1	0.0378138832744928	0.0309909717730613	0.10805572138011	0.389023195133146	0.0838663559167479	0.00799159284432777	0	0.129096338055414	0.249518107026211	0.0313689626709658	0.0435721379200623	0.0740751559819502	0.81808954267283	0.0566453050888441	0.00606170818936776	0.0281864139165245	0.377837668634104	0.0933627514509106
si:ch211-237a4.2.2	0.00327284796113565	0	0	0	0	0.0348620335024142	0	0	0	0.00140621353564132	0.00194480978103434	0.00272850225307934	0.018083626143727	0	0.00631014355576589	0	0	0.0468329235452523
znf1131	0.000906487230541005	0	0.0071727082627772	0	0	0.010250943086764	0	0	0	0.000743532730281839	0.000491758810793437	0.0097704877076343	0.00378124013332653	0	0	0.00138029654290928	0	0
si:dkey-238o14.3	0.00431201557156268	0.00300423226086835	0.0115494294101967	0.00484694792536088	0	0	0	0	0	0.00863014460545357	0.00344958488016254	0.00056532621414263	0.00386314425173793	0	0	0.00159311874661064	0	0
si:dkey-217g21.3	0.0034828824352756	0	0.00727549476114126	0.0125265044810542	0	0	0	0	0	0.00234645356656692	0.00473205107119021	0.00487905849523865	0.0289812082507799	0	0	0.000578518497434733	0	0
CR927050.1	0.0283965127727704	0.0298116788823896	0.0493126679114999	0.0527628202219781	0.0829884428612927	0.010250943086764	0	0.0219900077404827	0	0.0120434404073955	0.0357496630214557	0.0302587880115041	0.00767371600575248	0.0304266732388281	0.120827424366814	0.0336414102864723	0.071643566549905	0.0336245216911789
CR927050.2	0.00139462499456176	0.0287940568396884	0.0289826419819326	0.00980509535015275	0	0.0196886766916584	0	0.0909174960228097	0	0.00233995233508919	0.00531050297965691	0.00955428394747894	0.0190258624313904	0.0770739330294858	0.0212256140363781	0.00256315581687243	0.0264424348193982	0.0266562174294343
CR450780.2	0	0	0	0	0	0	0	0	0	0.000211397433432217	0	0	0	0	0	0	0	0
zgc:173714	0	0	0	0	0	0	0	0	0	0	0.000427219559410177	0	0	0	0	0	0	0
CR450780.1	0.0646467099268706	0.0101897547030796	0.00368592317791831	0	0	0.0282011895327414	0.134807225667296	0	0	0.0594173682710122	0.0194398129845597	0.00306056074691894	0.0108228759171957	0	0.0373073597117313	0.021818356161701	0.0350315423516238	0.0324304690743047
CR450780.3	0.000207768173601612	0.000476395326180734	0	0	0	0	0	0	0	0	0.00181522992428313	0	0	0	0	0	0	0
si:ch211-258f1.3	0.00401205904722927	0	0.00778196519827179	0.00975648640127081	0	0	0	0	0	0.00403066192502556	0.000785885777274185	0.00416908048410477	0.00928205268881125	0	0	0	0	0
znf1098	0.00116793913635573	0.00486731694020988	0	0	0	0	0	0	0	0.00132666252040407	0.00124866075608066	0	0	0	0	0	0	0
si:dkey-16p6.1.13	0.0219521096528489	0.0122086173784897	0.0115520015981519	0.0219304911020191	0.0457119332374673	0	0	0	0	0.0233536877659157	0.0142399651862755	0.00203217686517241	0.00591833292398197	0	0.00631014355576589	0.00173421792321161	0	0
znf1048	0.000490199678049793	0	0	0	0.0123737108140046	0	0	0	0	0.00112687690558482	0.000990362185315606	0.000494135598714457	0	0	0	0	0.0170280008445888	0
si:dkey-92j16.2	0.0007995331862251	0	0	0.00317401975954261	0	0	0	0	0	0.00117017130476127	0	0	0	0	0	0	0	0
si:dkey-30f3.2	0	0	0.00127270198066791	0	0	0	0	0	0	0	0	0.00272785394295744	0	0	0	0.00134388660607351	0	0
BX901974.1	0.00970446047916202	0.0163134145148533	0.0532985836288408	0.049380640113694	0.0327514492516294	0	0	0.158676242259119	0	0.0102736187647263	0.0322472408875244	0.0482477063151672	0.0680855874510113	0.0413156557414301	0.0463284688441047	0.0400025170168372	0.0933236546872129	0
si:dkey-179k24.1	0	0	0	0	0	0	0	0	0	0	0	0.000483569540128752	0	0	0	0	0	0
si:dkey-179k24.2	0.00182855471035693	0	0.000721767608874133	0	0	0	0	0	0	0	0.00040278306989978	0.00202778122435519	0	0	0	0	0	0
znf1091	0	0	0.00607368281788213	0	0	0	0	0	0.0630859103927729	0.000173030809035309	0	0	0	0	0	0	0	0
zgc:173607	0	0	0	0	0	0	0	0	0	0.000680591729269837	0.000564334659030692	0	0	0	0.0247463499133878	0	0	0
si:dkey-179k24.5	0	0	0	0.00260848493195637	0	0	0	0	0	0	0	0	0.00741157985236133	0	0	0	0	0
znf1103	0	0	0.00373166632335336	0	0	0	0	0	0	0.000129080999049757	0	0.000824014688556232	0	0	0	0	0	0
BX914205.2	0.000663872824272996	0	0.00251956695698797	0	0	0	0	0	0	0.0019654580417126	0.00149250479019412	0	0	0	0	0	0	0
BX914205.3	0	0.000947947267589399	0	0	0	0	0	0	0	0	0	0	0	0.0210185152100485	0	0	0	0
si:dkey-220o21.3	0.00183790083773548	0	0	0.00417439451451166	0	0	0	0	0	0	0	0	0	0	0	0	0	0
CT956002.2	0.16892224451034	0.185535116024877	0.0571282396752678	0.0256500074438201	0	0.157391210219705	0.376116596144805	0.0668914218440627	0	0.192375143797696	0.265586444591498	0.0366998552859486	0.0570014592209975	0.058605199525827	0.0124480312017325	0.172831941600813	0.146609476447156	0.0485446843186968
CT956002.1	0	0	0	0	0	0	0	0	0	0	0	0.000764419863419574	0.00510841330128655	0	0	0	0	0
znf1147	0.000197261742680855	0.00148471486051104	0	0	0	0	0	0	0	0.00140667104361171	0.000669859754142714	0	0	0	0	0	0	0
si:ch211-223a21.1	0.00310471786972961	0	0	0	0	0	0	0	0	0.00113835860366723	0.000546491747045584	0	0	0	0	0	0.0118168110680979	0
CR790382.3	0	0	0	0	0	0	0	0	0	0.000236448923060277	0	0	0	0	0	0	0	0
znf1105	0.000155419136581109	0	0.0110695579862317	0	0	0	0	0	0	0	0	0.00106414109000144	0	0	0	0	0	0
BX936382.1	0.00280661402250388	0.000763967036350315	0.00167630729254957	0	0	0	0	0	0	0.00164168468030637	0.000685543163653157	0.000804270353870913	0	0	0	0.011421313999333	0	0
si:ch211-223a21.3	0.00235369876735408	0	0	0	0	0	0	0	0	0.000283692128224303	0.00255137818549372	0	0	0	0	0	0	0
si:ch211-223a21.4	0.00197826163102997	0	0.00262760642134457	0	0	0.00690202574455603	0	0	0	0	0.000542850972968084	0	0	0	0	0.000578518497434733	0	0
znf1099.1	0.0021788374763991	0	0	0	0	0.00732077819872253	0	0	0	0.00209137440222093	0.000313264796843394	0.00109084538553858	0	0	0	0.00719581836603113	0	0
si:ch211-223a21.6	0.000370527803517109	0.00265023520837474	0	0	0	0	0	0	0	0.00352115687393679	0.00740212626160514	0	0	0	0	0	0	0
BX914214.1	0.000475992440668851	0.00125078173858662	0	0	0	0	0	0	0	0	0.000261325098038724	0.00172083604286848	0	0	0	0	0	0
znf1018	0	0	0	0	0	0	0	0	0	9.52961877941746e-05	0	0	0	0	0	0	0	0
znf988	0.00202847365684552	0.0170905395577869	0.000863953277406758	0.00302894826435207	0	0	0	0	0	0.00116387916834478	0.00387683791740972	0.0021954328599517	0	0	0.0147557916482219	0.0121037826741613	0	0
si:ch211-234c11.2.1	0.00110737605472032	0	0	0	0	0	0	0	0	0.000417478523234851	0	0	0	0	0	0	0	0
BX928743.1	0.000213335827371379	0	0	0	0	0	0	0	0	0	0	0	0	0	0	0	0	0
CT955963.1	0.0794443613185616	0.0401206893762657	0.0528956301651637	0.0184739331129905	0.0432647586908084	0	0	0.0611845325501713	0	0.0670249652979547	0.0260364517094546	0.0173829679611914	0.0281151862357724	0.0516806342921813	0.0147557916482219	0.0117826422538242	0.0118168110680979	0.0371128645010826
si:ch211-283l16.1	0.000338503706649438	0	0	0	0	0	0	0	0	9.36006087484071e-05	0.000326774895819262	0.000376047277566249	0	0	0	0	0.00470295656067143	0
si:dkey-14o6.2	0.0181066360635301	0.0494850888915562	0.0556808335239892	0.0155407679956863	0.0466730858086821	0.0140846062296213	0	0	0	0.00757294290284798	0.0268753939413488	0.0435200546441339	0.0555566171539931	0	0	0	0.0652464668643569	0
si:ch211-194h1.2	0.000248561024304073	0.0262428997450457	0	0	0	0	0	0	0	0.0054821125824942	0.00579010293958174	0	0.0113349138754334	0	0	0	0	0
znf1126	0	0.0134740019133083	0.00770722226475064	0.0163315561135156	0	0	0	0	0.060084960133629	0.000523765108528321	0	0.00221409313606887	0.0276809793627372	0	0	0	0.0235509678270229	0
si:dkey-14o6.4	0	0	0.00373166632335336	0	0	0	0	0	0	0.00122975624795637	0.000794531841181348	0.000394064614538407	0	0	0	0	0	0
si:dkey-14o6.1	0.0240601554009305	0.0064035595133452	0.0213692074655035	0.032764512235924	0.0434595961298297	0.011215728938263	0	0	0	0.0129170956840069	0.00725487795319254	0.00408569722803483	0.0386778789837404	0	0.0307929176289453	0.0180053557678247	0.014042833450591	0
znf1027	0.000203455322431926	0.00113335509375113	0	0	0	0	0	0	0	0.00458686659191318	0.00868000773767382	0.00300042876126999	0.00355680755181379	0	0	0	0	0
znf1095	0.00106127207665786	0.00300774494322882	0.00708557941707663	0.00337354600167328	0	0	0	0	0	0.0061273434035342	0.012163877505121	0.013097675656485	0	0	0	0.00192240510350824	0	0
si:dkey-14o6.8	0	0	0	0	0	0	0	0	0	0.000367376588170418	0	0	0	0	0	0	0	0
znf1108.1	0	0	0	0	0	0	0	0	0	0.000374220013226432	0	0	0	0	0.00718971870225578	0	0	0
si:dkeyp-5g9.1	0.00438247795024929	0	0	0	0	0.00815078960774325	0	0	0	0.00941591345846884	0.00355659352951145	0.00106140087295976	0.00690901147061455	0	0	0	0	0
si:dkey-205i10.1	0.00675574146729397	0.00324981313574469	0.00999586171325071	0.0292179144381051	0.0528960592435863	0.00996348383175661	0	0	0	0.00295970330877233	0.00434487534987109	0	0.00377235355251965	0	0	0.00120158570862796	0	0
si:dkey-205i10.2	9.15966167800349e-05	0	0.00111740220970757	0	0.0179018976011457	0	0	0	0	0.000492423376952853	0.00661746311651822	0.00926252884337146	0.0033660740132354	0.0264101013355588	0	0	0	0
si:dkey-28k24.2.2	0	0	0.00094488629427312	0	0	0	0	0	0	0	0	0	0	0	0	0	0	0
si:ch211-203c5.3	0.0021745381015022	0	0	0	0	0	0	0	0	0.00281888719186724	0	0	0.00347378421894567	0	0	0.00324401900216571	0	0
si:dkey-27n6.1.1	0.0017350703182119	0	0.00859320468214365	0	0	0	0	0	0	0	0	0	0	0	0	0	0	0
BX004873.1	0	0	0	0	0	0	0	0	0	0.00033149242527095	0	0.000824288144758187	0	0	0	0	0	0
BX649556.2	0.00147352683786003	0	0	0	0	0	0	0	0	0	0	0	0	0	0	0	0	0
si:dkey-29m1.2	0.00845887031206542	0.00917790471851148	0.0185190263113794	0.0138145730859043	0	0	0	0	0	0.00474033519919611	0.0143146824039141	0	0.0210759145802347	0	0	0.0145892878242013	0	0.0458761893402086
BX649331.1	0.0046287951686087	0	0	0.00430665447022121	0	0	0	0	0	0.00107996277313973	0.00382523861838501	0.00154805543338818	0	0	0	0	0	0
znf1070	0	0	0	0	0	0	0	0	0	0.00141289395722209	0	0	0	0	0	0	0	0
BX572103.1	0.00321818200438042	0	0	0	0	0	0	0	0	0.00148233882233517	0	0	0	0	0	0	0	0
BX088712.1	0	0	0	0	0	0	0	0	0	0	0.00266812381802115	0	0	0	0	0	0	0
znf1091.1	0	0.00438083472424836	0	0	0	0	0	0	0	0	0	0.000731729251103649	0	0	0	0	0	0
si:ch211-223k15.1	0.0452315069830435	0.0075743052245786	0.0146588064153927	0.00873871463942126	0.0453271379015362	0.0523638157836392	0	0	0	0.0308201959243882	0.0178466544049111	0.000852728137393604	0	0	0	0.00723982948753591	0	0
si:ch211-66c13.1	0.342125536524001	0.134265919635758	0.0257594375949371	0.0870631428891897	0.0996265696206786	0.0484365499987413	0	0	0	0.368782243939955	0.106065780372116	0.0301750948553428	0.0551402201849532	0	0.0061122826319489	0.0296396530738825	0.0258618902224315	0.114834882449909
si:ch211-133h13.1	0.00527003974653736	0.015357144363321	0.0187100916544917	0.019447048724573	0.0257052888631836	0.034572913708814	0	0	0.10439830039567	0.00161833857749863	0.00120039311114164	0.00203051521840169	0.00151397359781443	0	0	0.00362754145554375	0	0
znf1096	0.00171053091953436	0.00166901162800401	0	0	0	0	0	0	0	0.000235818971134065	0.000428628583131356	0.00263938101791102	0	0	0	0	0	0
CT573234.1	0.00125565988694038	0.00948902521137614	0	0	0.0131546060853208	0	0	0	0	0	0.0071397360582374	0	0	0	0	0	0	0
CT737127.1	0	0	0.000632924611716574	0	0	0	0	0	0	0	0.00031336997380415	0	0	0	0	0	0	0
znf1146.1	0.000213102741392024	0.0051184623763794	0.00465005287752233	0.00236439486150794	0	0	0	0	0	0.00332955361929306	0.00175498065830535	0.00370564383017525	0.00297641193541186	0	0	0	0	0
si:dkey-237g15.2	0.00954891491051855	0.0426599278559134	0.00574835365134405	0	0.0249025686999614	0	0	0	0	0.00421554584431837	0.00113696713094551	0.000412623336209868	0.00291124628998051	0	0	0.00765891299395691	0.0293292976219806	0
si:dkey-16p6.1.14	0.00583422343769345	0.017683465959328	0.00505353153793131	0	0	0	0	0	0	0.0085543058756934	0.00261758538315664	0	0	0	0	0.00694363156730331	0	0
BX548011.3	0	0	0	0	0	0.0518524279899406	0	0	0	0	0	0	0	0	0	0	0	0
wu:fi09b08	1.54335435335483	0.719663092635594	0.395152516309597	0.482240491328104	0.204748448657519	0.578768185798956	0.310655483069276	0.591503368058563	0.324694774703646	1.69192143317673	0.626879949078022	0.192228518221782	0.332771013501752	0.380249371335664	0.338575682441712	0.27318269514931	0.358002989889349	0.373588814015393
BX548011.2	2.51762354391611	0.800905184823815	0.577839310495608	0.677281040548316	0.77645140920393	0.728989600968934	0.188058298072402	1.43657928239474	1.11328577052514	2.31855942315602	0.507239461042699	0.217416463271328	0.423526331369246	0.233546649690275	0.328393823998201	0.257421062535549	0.355993668533248	0.287294330877741
si:dkey-16p6.1.15	0.012308312962506	0.0348471364748637	0.00250737672171232	0.0262613346248084	0	0.0378594067454024	0	0.114632959313281	0.106658702816856	0.0120235026243371	0.0150293232448022	0.0121286381398855	0.00323057937210459	0.0301595439876949	0	0.00316445431657645	0	0
zgc:174180.1	0.00120909211519348	0	0	0	0	0	0	0	0	0.0160408635656894	0.00134313716009228	0	0.00715438080622717	0.0352288820466571	0	0	0.0132698503691672	0
CABZ01002702.1	0	0	0	0	0	0	0	0	0	0	0	0	0.00564195584041164	0	0	0	0	0
CR388378.3	0	0	0	0	0	0	0	0	0	0	0	0.00129603701689086	0	0	0	0	0	0
CR388378.1	0.00534736367467855	0.00825739298811897	0.0123163620590777	0.00566662162543372	0	0.0102982899689507	0	0	0	0.0150478421779588	0.0307776799611563	0.0221482171684888	0.0142441360489427	0	0.043072329012541	0	0	0.0194196627969752
znf985.1	0.000289772449519249	0.0129586234413296	0	0.00571226194148359	0	0	0	0	0	0.00303271972868633	0.00204195315269399	0	0	0	0	0	0	0
si:dkey-264f17.3	0.00967511252953124	0.0290216309278037	0.0144992690342152	0.0121135661158066	0	0.0100284306007531	0	0	0	0.0178431968074829	0.0246294533481244	0.00762331757024855	0	0	0.0635017472229472	0.00391398082791247	0	0
si:dkey-264f17.1	0.029935940402527	0.0288974013607459	0.0502247824296988	0.122014681652032	0.136347449480917	0	0.29218407596786	0.0879229091932194	0.133544827134201	0.0348578739699153	0.0884768873147883	0.0357580160543712	0.150382965843375	0.0406962892281812	0.145256586165721	0.0088291854173117	0.131072990298147	0.0206584680093294
si:ch211-266c8.1	0.0811760372795302	0.0639087208017106	0.0685959732753725	0.104727211323614	0.0639268040224668	0.0512376844504015	0	0.0414593698175788	0.05780848050409	0.136730232826873	0.0864415014292617	0.0344184559552842	0.0871904816645741	0.0525933795453828	0.0132514268916235	0.019801379578714	0.155778183438609	0.0755895375170159
si:dkey-264f17.2	0.0130104391551045	0.00430247810132069	0.0136106197724098	0.0134506339100396	0.0123737108140046	0	0	0	0	0.0167640634580005	0.00627924427100338	0.0141830608541863	0.0048947745833935	0	0.0121311425180883	0.00329767882982526	0	0
zgc:173615	0.000614300549995915	0	0.000910372630994201	0	0	0	0	0	0	0.00276538353711843	0.00660262651801388	0.00056532621414263	0	0.0283390483747556	0	0	0	0
si:ch211-209j12.3	0.00391827037351644	0.00174630699727751	0	0.00274094405787997	0	0	0	0	0	0.00352141324910788	0.000542850972968084	0.0013505071572084	0	0	0	0	0	0
si:ch211-209j12.2	0	0.00790657589917534	0	0.00426718009377555	0	0	0	0	0	0.000150980752852842	0	0.00056532621414263	0	0	0	0	0	0
si:ch211-209j12.1	0.0100527726649343	0.00554607797110704	0.00649258059799742	0.0153725980830467	0.0234857558890533	0.0092167597559402	0	0	0	0.0173872684031381	0.057348487175303	0.0211801403676326	0.107222731633078	0	0.0811316255053439	0.00504747656456631	0.0507929139747687	0.089150427743638
znf1078.1	0.000663873130376675	0	0.00354029984505177	0	0	0	0	0	0	0.00347933262874509	0.00459022009350086	0.000961016391009251	0	0	0	0	0	0
si:dkey-82i20.5	0.00396638420490198	0.0141513854299914	0	0.00748388073656808	0	0.0173975069372559	0	0	0	0.000992318077021609	0.00771988569560583	0.00191405044088545	0	0.0314035831488373	0	0.0254255312417074	0	0
si:ch211-209j12.6	0	0	0	0	0	0	0	0	0	0	0.000335214197849856	0	0	0	0	0	0	0
si:dkey-246j6.1	0.00167006555063128	0	0.000752257638010315	0.00438990427374741	0	0	0	0	0	0.0027164750728354	0	0.00150627952872731	0	0	0.00905551027800417	0	0	0
si:dkey-246j6.3	0.00473301212650717	0.02112583477971	0.00687872396941138	0	0	0.0111474642305742	0	0	0	0.00308980468942466	0.0118379309895307	0.0066122228062857	0.00233960542554498	0	0	0.00258012314411742	0	0
znf1025	0.0063590235474907	0	0	0.00991636848857268	0	0.00927286805172406	0	0	0	0.00654703797132682	0.00659202531301745	0.00300372962894583	0	0	0	0.00287232514720666	0.00719086644907105	0
znf1101	0.000247666768523753	0	0	0.00467118557097074	0	0	0	0	0	0.000555398049610739	0.000261325098038724	0	0	0	0	0	0	0
znf993.2	0.000169007425138415	0	0.000943792084868805	0	0	0	0	0	0	0.000727870692897962	0.00314936823673171	0	0	0	0.0367107195301028	0	0	0
znf1030	0.00307745465349366	0.00731346994895198	0.00234441247968274	0	0	0	0	0	0	0.00443955481618117	0.00380814615153914	0.000504797265089185	0.00334453194111617	0	0	0.000791888276600874	0	0
si:ch211-120c15.3	0.00051399582379563	0.0102959241186626	0.00111475300919214	0	0	0	0	0	0	0.00256126737678911	0.0122029901160266	0.00514571554346316	0.00452151108900595	0	0	0	0	0
si:ch211-76m11.8.1	0.0130472031625665	0.00912182223456194	0.0174234439407138	0.042704120332023	0	0.00796841321003542	0	0	0	0.0238310152690242	0.0119842800809498	0.00998114891236473	0.0273505171631417	0.0183082114159021	0.0655200655200655	0.0188636121418938	0.0622567516395237	0
zgc:174944.1	0.0305011440856143	0.00988386000509733	0	0	0	0	0	0	0	0.0243493106576903	0.0232980146769383	0	0.00297051025939981	0	0	0	0	0
znf1081	0.000997676909316656	0.00148669482466665	0	0	0	0	0	0	0	0.000435577458023838	0.000923898337237511	0.00184768718323204	0	0	0	0	0	0
si:dkey-238o14.7	0.00091901603159136	0	0	0	0	0	0	0	0	0.00163646837033934	0	0	0	0	0	0	0	0
znf1087	0.00300252150786994	0.0146912890065551	0.00530399459230636	0	0	0	0	0	0	0.00341110747725735	0.00414851198698136	0.000468769805524283	0	0.0381074324736297	0	0.0137537490639697	0	0
znf1117	0.000887646176070903	0.000955222055695177	0.00137799849182377	0.00438370384398223	0	0	0	0	0	0.0084340893591146	0.000490045365459662	0.00269131376787106	0.00488593083412458	0	0	0.0190446961240927	0	0.040077911459878
si:ch211-145h19.5	0	0	0.00217310585209989	0.00221611019031733	0	0	0	0	0	0.00170333119965844	0.000704711404471507	0.00333665717108657	0	0	0	0	0	0
znf1076	0.00135074421186406	0	0.0039270603518489	0	0	0.0111985844989193	0	0	0	0.0103386868663207	0.0148682304146572	0.00340784744298103	0	0	0	0.000578518497434733	0	0
si:dkey-190j3.4	0.0464181116285885	0.00656579492709499	0.000854711520331792	0.0172829785671077	0.140972890697056	0.0189287164401652	0	0	0.0920522120146547	0.0542261186531403	0.0245434774110665	0.0177493770495281	0.0696818096312212	0.136826480886882	0	0.00681300777305109	0	0.0903654696709502
si:dkey-3h2.4	0.00251778882281129	0	0.00232501690287288	0	0	0	0	0.0427745269137323	0	0.00173447562877835	0	0	0	0	0	0	0	0
si:ch211-171l17.14.1	0.011374246394612	0.0142532307437114	0.0223654497980107	0.0737743052283458	0.0343997248022016	0.0280798150176646	0	0.0219900077404827	0	0.0156355313659167	0.0245653948370438	0.00917782446203805	0.0171512240924112	0	0	0.00950898973665576	0	0
si:ch211-171l17.4	0.0073621893480912	0	0.00303828447128624	0.0319331280886225	0.0345776522999708	0	0	0	0.0920522120146547	0.00602455205952393	0.0143660638207184	0.0539483820137978	0.128850702286534	0.116678967267069	0.00714043449543905	0.00811508167298775	0.0342217703569236	0.100338176173036
si:ch211-208f21.3.1	0	0	0	0	0	0	0	0	0	0	0	0	0	0	0	0.00372767680743865	0	0
si:dkey-3h2.4.1	0.00856805508816302	0.00357864977543973	0.0171923152083058	0.0216767757110193	0	0	0	0	0	0.0093746975010554	0.0143297248679454	0.0106100306852532	0.0103715030411781	0	0	0	0.0836656077526937	0.0341611724114372
si:dkey-3h2.3	0.00694956372053615	0.0305680246910505	0.0269871199198378	0.0103727361689998	0.00618394770853818	0.0195513034656937	0	0	0	0.0317512991090779	0.0253222989977718	0.000881925705857908	0.0148206955875058	0.0319521484624626	0.00606943432872056	0.000922983659128105	0.0170280008445888	0.0421496311907271
si:dkey-3h2.2	0.00189487534752014	0	0.0103939568107752	0.00225556854763039	0.0041581338295373	0.0369289855607666	0	0	0	0.001863601188804	0.00741864724465225	0.00319037741099008	0.0199793472138448	0	0.0369344413665743	0	0.03250039565718	0.034662525650269
si:ch211-11p18.6	0.00192124194896608	0	0.000609282009285336	0.00236439486150794	0	0	0	0	0	0.00684069165644274	0.000722828882239441	0	0	0	0	0	0	0
si:dkey-29j8.1.2	0.00813747052703965	0.0182085725238303	0.0106658072956291	0.0184291147767416	0	0	0	0	0	0.014681824439067	0.0442799611066673	0.0232265531332685	0.0757853542963549	0.0742072825611772	0	0.00944801767423752	0.0617481676390376	0.0382216242661448
si:ch211-76m11.3	0.0084102858662551	0.003165949579087	0.0170064724360061	0.00965005847258459	0.0181082329080917	0.011215728938263	0	0	0	0.0125400837970762	0.00336913426329487	0.00661798511050625	0.018168163166276	0	0.0367107195301028	0.0144807400920768	0	0
si:dkey-190j3.6	0.00579526799902895	0	0	0.00185607235415494	0	0	0	0	0	0.020804723956914	0.01628288314907	0.0126761710856772	0.00820703652593106	0	0	0.00571892902139342	0.0149555968330028	0.0553661926855356
si:rp71-7l19.2.1	0.00371790830885107	0	0.00188729276345899	0.00571401470673105	0	0	0	0	0	0	0	0.00235213536256755	0	0	0	0	0	0
si:dkey-265e15.2.1	0.00182002335089959	0.00946512574419551	0.0430401257291329	0.0801057676886465	0.0211202162710146	0	0	0.0523516354650919	0	0.00281247436717213	0.00805882296055368	0.019371529463533	0.0469059877233315	0.0414372081266653	0	0.00954574168158141	0.0150335021595626	0.0401131189955675
si:dkey-190j3.2.1	0	0	0	0	0	0	0	0	0	0.00102918861239851	0	0	0.00364035478897773	0	0	0	0	0
si:dkey-51d8.3.1	0.000326086992283665	0.00284294312361354	0	0	0	0	0	0	0	0.00646476376163404	0.000853444759081079	0.00141436174027029	0	0	0	0.00120158570862796	0	0
CABZ01033540.1	0	0	0	0.00620732464307883	0	0	0	0	0	0	0	0.0013226112593183	0	0	0	0	0	0
si:dkeyp-44b5.5.1	0.00332532596073473	0	0	0	0	0	0	0	0	0	0.00188730523010025	0	0	0	0	0	0	0
si:ch211-211k8.12	0	0	0	0	0	0	0	0	0	0.000738982509761959	0	0	0	0	0	0	0	0
BX088583.2	0.000249376707856384	0.00431986888486663	0	0	0	0.00968804495252858	0	0	0	0	0.0268344774329608	0.000725672184702148	0.00595755835428408	0	0.0837520938023451	0	0.0108718223022388	0
si:dkey-28k24.2.3	0.0103649532255441	0.00131508353283341	0.0119347624554216	0.0177580364475123	0.0445982851460953	0	0	0	0	0.00602525939197313	0.0251095224126926	0.00203683657453287	0.0129588567890109	0.0430152464957795	0.0879507475813544	0.0133810747321111	0.0289269407680311	0.040077911459878
si:dkey-16p6.1.16	0.0284028273393429	0.0526843922078033	0.0372948810836915	0.113919197703997	0	0.0225851680929729	0	0.0879229091932194	0.05780848050409	0.00458062523145061	0.0073551622062286	0.0121960034749723	0.00347378421894567	0.034854013962518	0.00693397125868913	0	0.0108718223022388	0
si:ch211-127b6.2.1	0.0110902041895349	0.00952613551800274	0.0191411576204736	0.0472070127917182	0.0706433804179866	0.0210673053578736	0	0.0496978371501272	0.163711579422895	0.0257719646447911	0.0190290391013402	0.013088490942548	0.0198258271416701	0.0183082114159021	0	0.0245701606424439	0.0266248190413284	0.0021316843759899
im:7141269	0.00103144281211743	0.000955222055695177	0.00252386733956062	0.00354501692922835	0	0	0	0	0	0.00449977005099071	0	0.00339564008640009	0	0	0	0.012261270471303	0	0
si:ch211-108c17.2	0.0112020585730249	0.0174688168505079	0.0195234404147728	0.0133359545831654	0	0	0	0	0.0962667744854541	0.0130189626229285	0.0126170065897546	0.0110941878741047	0.0161814474322084	0.0648756657865201	0.00714043449543905	0.0120616271468165	0.00908241703098512	0.0021316843759899
CU468012.1	0.0139643771498378	0.0050673963717442	0.00284441558274126	0	0.00816943406245532	0.00732077819872253	0	0	0	0.00594439937548361	0.00152614017118375	0	0.00452971379003418	0	0	0	0	0
CU468012.3	0.00818204021069094	0	0.00394686817627271	0.00609683024625464	0	0.00922394351256993	0	0.0427745269137323	0	0.00367035205536636	0.00504517958316726	0.00302337267984364	0	0	0	0	0	0
si:dkeyp-80d11.12	0.0292157923099156	0.0808067174527321	0.0245940442191505	0.0454023432240254	0.0189118142103372	0	0	0.122369065100343	0	0.00706858458878321	0.000948237584888125	0.000814896609381546	0.023454852968773	0	0	0.00290816029779561	0	0
si:dkeyp-80d11.4	0.00220097199444711	0	0.0026780708374396	0	0	0	0	0	0	0.0117691947390342	0.0191834349117078	0.00481740265018914	0.005790575190284	0	0	0	0	0
si:dkeyp-80d11.14	0.00158961561345889	0.00609354751812063	0.00892791684156788	0.00571226194148359	0	0	0	0	0	0	0.00325108944007137	0	0.0038905661551869	0	0	0.00290816029779561	0	0
si:dkeyp-80d11.10	0.0134021246399611	0.0660802582537459	0.0119913449487473	0.0519564886067693	0.0847559561100235	0	0	0.0744180508424123	0	0.00831354909206765	0.0320227921239565	0.00583482660432145	0.0134288441051219	0.0312087459389619	0	0.00239610259536249	0.0118989399234422	0
BX548059.1	0.00737766517128668	0	0	0	0	0	0	0	0	0.00370611696284464	0	0.00429237605334908	0.0109337069928632	0	0	0.00239610259536249	0	0
si:dkeyp-80d11.1	0.000248561024304073	0	0	0	0	0	0	0	0	0.00128843276150561	0.000434910850669097	0	0.00390272839742264	0	0	0	0	0
si:dkey-193i10.4	0.0128383328387062	0.0581576807303164	0.00467697004350748	0.0401795182064199	0	0.0466339362323474	0.188058298072402	0	0	0.0116561187051466	0.0199594130255282	0.0165259884422288	0.00788354238313332	0.0370184671130136	0.00650596922676556	0.00348567110322885	0.0197555448875613	0
CT737123.1	0.0354562606319626	0.0581357664887387	0.114402145505852	0.00624269994275444	0.0409226042489886	0.0896911827957198	0	0	0.0853322410806475	0.0644084729104373	0.153661376156493	0.169699958099001	0.0446797360552467	0	0.267277016296303	0.109415330511396	0.121191044051253	0.041491353937519
si:dkey-193i10.1	0.006658796533346	0.00357864977543973	0.000721724997804152	0	0	0	0	0	0	0.012411570745134	0.0106229315637735	0.005298110172814	0.00947767176420473	0	0	0	0.00454120851549256	0
si:ch211-205a14.7	0.00673742281088047	0.0123855007570354	0.0081859687975112	0.0134814769657324	0	0	0	0.227938094237391	0	0.00609797024504333	0.00547524303073107	0.00754055290109252	0.0110063038839198	0	0.00607275156373353	0	0.0149555968330028	0
si:rp71-7l19.2.2	0.00714158232353777	0.0011318542262305	0.000894355027822491	0	0	0	0	0	0	0.031950251194908	0.0199925950306817	0.000676216237453061	0	0	0.0359485935112789	0.00608625517597574	0	0
CR376730.1	0	0	0	0	0	0	0	0	0	0.00292999423377135	0	0	0	0	0	0	0	0
si:ch211-205a14.1	0.0158601629976695	0.0115279222146005	0.0118061476067062	0.0352205735763456	0	0.0155210955510041	0	0	0	0.000981652661263187	0.0350546943275914	0.00523720487833744	0.00244578908493247	0.0296953553494698	0.00650596922676556	0.00290816029779561	0	0
si:dkeyp-123a12.2	0.00564878295530009	0.00155654863358378	0.00147679860779242	0	0.0280609834486104	0	0	0	0	0.012833961603462	0	0.0190712934217823	0.00233960542554498	0	0	0	0.00470295656067143	0
BX950220.2	0	0	0	0	0	0	0	0	0	0	0.00392017581204482	0	0	0	0	0	0	0
si:ch211-76m11.9	0	0	0	0.00229334654300942	0	0	0	0	0	0	0	0.00258516852255267	0	0	0	0	0	0
si:ch211-76m11.8.2	0.0053222083042598	0	0.0139047201951859	0.00725154748023228	0.056973489937372	0	0	0	0.0920522120146547	0.00248769469076152	0.0230133729899296	0.00733062527520462	0.0292715616559566	0	0	0.00159311874661064	0.0131216031449858	0
si:ch211-76m11.15	0.0116157104456046	0.022849262139569	0.00206991853628609	0.0186277420937792	0	0.0165447217112925	0	0	0	0.0213048667981057	0.0456665014725721	0.00216457947091184	0.00352777238812552	0	0.0369344413665743	0.00421375167047593	0.0087025158102956	0
si:ch211-76m11.3.1	0.00173417225917187	0	0	0	0	0	0	0	0	0.00220387923836797	0.00520677415005154	0.00249703025195517	0	0	0	0	0	0
si:ch211-76m11.5.1	0.00619558394224222	0.0010409640159559	0.00236740944220365	0	0	0	0	0	0	0.0221594370328525	0.0180782810199221	0.000468769805524283	0.0141947560438232	0	0	0.00287232514720666	0	0
si:dkey-16p6.1.17	0.194914048382706	0.411784297160499	0.424212913216488	1.57534403912103	1.77505577142413	0.132190630135822	0	0.665785123010309	0.628832762959828	0.168088515577442	0.344417888429008	0.386560789738449	1.91655569109244	1.12092772210989	0.298200261225766	0.162121963919468	1.09340080098696	0.96644268705949
si:dkey-27n6.1.2	0.0300291784372791	0.049294998312007	0.00553182031644492	0	0	0.00922394351256993	0	0	0	0.0368997630492282	0.0141856691061381	0	0	0	0.027462353424689	0.00348567110322885	0	0
si:dkey-27n6.4	0.00839393738368162	0	0.000721767608874133	0.00602847974400664	0.0347403161368768	0	0	0	0	0.00858617141881433	0.0071115680791008	0.005339311751082	0.00692735047159467	0	0.0528239483797193	0	0	0
BX927130.3	0.000533946945155168	0	0.00319564471972438	0	0	0	0	0	0	0.000295767542801113	0	0.00353750886731638	0.0157623561471097	0	0	0	0	0
BX927130.4	0.00400519140980109	0.000681036537610243	0	0	0	0	0	0	0	0.0026717487258472	0.00416400407599388	0	0	0	0	0	0	0
si:dkeyp-4f2.1.1	0.00991083965873601	0.00184163080090682	0.0144683728471508	0.0280430558944609	0	0	0	0.162017584222887	0	0.163560885497593	0.0387520670530776	0.00471502569732041	0.0203759818933806	0	0	0.035481470471447	0	0.0805226417137496
znf1116.1	0	0	0.00295025593439838	0	0	0	0	0	0	0.000164309677209038	0.0034939584426122	0	0.00305615532603829	0	0	0	0	0
znf1017	0.0022461158407942	0.00323791206478414	0	0	0	0	0	0	0	0.00999135295407453	0.00281547450224995	0.000450327239294979	0	0	0.0332253509427693	0	0	0
si:dkey-264f17.4	0.0321042048541706	0.0638551082997276	0.0150661144117117	0.00734189937794912	0	0.0322302230596268	0	0	0	0.0348220308660413	0.0834154628587554	0.0151446349296796	0.0268975569153001	0.0153962691760533	0.00607275156373353	0.0889743990554374	0	0.0573644478098254
CU302323.1	0.0033191875254794	0.0182822825785883	0.00266370946331001	0.00534499825753057	0	0	0	0	0	0.00321824899626692	0.00275155327735575	0.00132115747607958	0	0.071475199729125	0	0.0048907975764359	0	0
si:dkey-29j8.1.3	0.000458823419833936	0	0	0	0	0	0	0	0	0.00323949976979294	0.0109835101815766	0.00196748883304358	0	0	0	0.00198349415503942	0	0
CU651668.1	0.000736609538172066	0	0.010239920132419	0.00209212155142529	0	0	0	0	0	0.00385136833938894	0.00216307818252746	0	0	0	0	0	0	0
ftr64	0.00628323387477063	0.0250707118169626	0.00994170419609276	0.00849749342942493	0	0.00931779745903663	0	0	0	0.0220000872501773	0.0258347480921505	0.00536364489810351	0.00653823395762571	0	0	0.0556409194539295	0	0
pyroxd1	0.0371990380840167	0.0753051913607313	0.0847433763122205	0.0706017899089405	0.068657372306216	0.391884039101693	0	0.165599552495514	0	0.0458615630375694	0.0725804354968279	0.0566680671311209	0.0971669676357335	0.101603134407432	0.0595901205570626	0.033995668319313	0.123161693403468	0
parp11	0.00791589682421085	0.0136243494373144	0.00332988975525151	0.0438206699069249	0.0191841002177395	0	0	0	0	0.00110696871100472	0.0124031368316066	0.0028533319317178	0.0163179012097377	0	0	0.0126450760007497	0.0202101042437177	0
slco1f1	0	0	0	0	0	0	0	0	0	0	0	0	0.0020669527329249	0	0	0	0	0
zgc:165515	0.0149253918568614	0.0217434906172984	0.0414190847388833	0.0117143366407209	0.00399147421108512	0.00930934006088308	0	0	0	0.0229488242228236	0.0321456883327873	0.026808881006485	0.0105008925758689	0	0	0.00848458595428031	0.039120114676523	0
si:cabz01071912.2	0	0	0	0.000991427031317495	0	0	0	0	0	0	0.00056880556519365	0.00227200682269744	0	0.0279454504806618	0	0	0	0
si:cabz01071911.3	0.025175827475147	0.0450723931953523	0.0227395560712519	0.065318265715537	0.047673531655225	0.0358547473633842	0	0	0	0.0137402443159814	0.018084873295245	0.0131774337659875	0	0	0	0.0140625962970147	0	0
CABZ01071909.1	0.001414058741697	0	0	0	0	0	0	0	0.0661222600588488	0.0037790861664678	0.00742197238523001	0.00650697344809121	0.00649101967428063	0	0	0	0	0
si:cabz01071909.2	0.00769098507772359	0.0143913811547933	0.00183999682048549	0	0	0.00910709488226803	0	0	0	0.00800206427091786	0.00528170225717383	0.00283788488792177	0	0	0	0.0042355795458781	0	0
CR788316.3	0.00870221438423721	0.00334870388416164	0.00443955168107465	0.00419130630862852	0.0263092121706416	0	0	0	0	0.00268899850300772	0	0.000783485789499778	0.0147305672669716	0	0	0	0	0
si:ch211-161m3.6	0.0338749144401077	0.000626598217077433	0.0159261512746193	0.00478538432391575	0	0	0	0	0	0.0187422474594262	0.0306944695819843	0.00940805837265695	0	0	0	0	0	0
CR788316.1	0.61495552351886	0.081815107439752	0.0503882902581586	0.0216674720762179	0.0274772301001384	0.0498330918127495	0	0	0	0.242592841561008	0.0439601193452504	0.0190642592472028	0.0292235537102128	0	0	0	0.0086920317537304	0.0042633687519798
CR788316.2	0.178963625512687	0.0192880693574583	0.0178365128334015	0.0154141802603803	0	0	0	0	0	0.0418585022345843	0.000569657684722043	0.000734542345962247	0	0	0	0	0	0
CR788316.4	0.0061478016443466	0	0	0	0	0	0	0	0	0	0	0	0	0	0	0	0	0
zgc:175107	0.016260068227939	0.00869861979609208	0.0102745837997679	0.00620732464307883	0	0.0194888509126407	0	0	0.118824116542693	0.00968307496668652	0.00437875179357889	0.00299189795175734	0.00402361864142517	0.0296953553494698	0.00667902285895574	0.00777433686346586	0	0
si:ch211-161m3.4	0.0498708567415287	0.039206328913343	0.0101973423055703	0.00442603952353157	0	0	0.366501740883269	0	0	0.020571644541211	0.0380092759371199	0.00536982478747098	0.00515174463832177	0.0413156557414301	0	0.0203857111820287	0.0155209128780118	0
si:cabz01054396.2	0.00626935851227434	0.0013383279733298	0.000805915938776823	0.0020412116550736	0	0	0	0.0402149084708683	0	0.00901290843851308	0.0090277887917256	0.00549289072148522	0	0	0	0.00198349415503942	0	0
si:cabz01054394.5	0.00517809395662235	0.00298186133748408	0.00900764653448647	0.00300596835015924	0	0	0	0	0	0.00573369992897384	0.00423920994842956	0.00158733201355718	0	0	0	0	0	0
si:cabz01054394.6	0.00965875645631003	0.0223521846860391	0.00137885617813057	0.000801427695353611	0	0	0	0	0	0.00922130950606161	0.0106456967852726	0.00202726734566626	0.0103652721920478	0	0.00606170818936776	0	0	0
si:cabz01054394.7	0.00163125067682759	0	0	0	0	0	0	0	0	0.00296591906606724	0.00233438937601977	0.000805313393344214	0	0	0	0.00421343580409209	0	0
CABZ01054394.1	0.00474862208179388	0.00136890852816324	0.00189898505489789	0	0	0	0	0	0	0	0.00850706902189666	0.00130835259758046	0.00216200789997687	0	0	0	0	0
CABZ01054391.1	0.00159611976899678	0	0	0	0	0	0	0	0	0.00281659436917748	0.000671305116499632	0	0	0	0	0	0	0
rab3ip	0.0441569627304086	0.207219496028097	0.00147934010842896	0.0201016036206336	0	0.0146953242364637	0.29218407596786	0	0	0.0429315949232562	0.203575433348902	0.0274499069819167	0.024245290583734	0.0352288820466571	0.00607275156373353	0.0671167922878501	0.0196900781696103	0.045586123583981
myrfl	0.524394777322534	0.986060406186734	0.0406630252722986	0.0720941679340052	0.0210978116368654	0.375821317703418	0	0	0	0.273012789636283	0.42459161148613	0.0159490202061838	0.0446161597084363	0	0.283647703569964	0.0631826370232682	0.0199782636491497	0.0063950531279697
LO018021.1	0.00392956463308326	0.00583241290126713	0	0.00215856890335418	0	0	0	0	0	0.00267061974532796	0.00380263316803726	0.00527218526944092	0	0	0.00631014355576589	0.0173477388957123	0	0
zgc:152938	0.0204571263958445	0.00388967997445758	0.0153441014860596	0.0101156543948198	0	0	0	0.0402149084708683	0	0.0143108731300256	0.0186152319475208	0.0260871037316498	0.00823146890562621	0	0.00905551027800417	0.00857221672961626	0.036593466729997	0
si:ch73-170d6.2	0.43624304187702	0.131223786808885	0.197999099981216	0.224556685141942	0.225060128588426	0.0171447210955651	0	0	0.32805547861544	0.523339498191487	0.104160928014044	0.128143954909835	0.21628265713562	0.295293847574331	0.00650596922676556	0.125736610370803	0.142217143937246	0.109152919534237
si:ch73-170d6.3	0	0	0.000811829788843884	0.00514561313325131	0.150944740496969	0.0440787932583544	0	0	0.342235882292801	0.00016389360866061	0	0	0	0.0765670331365822	0	0	0	0.153747216112293
LO018260.1	0.0363144917098107	0.130019525315859	0.105152261694227	0.430926560816721	0.197196189748905	0	0.0674036128336479	0.141690585404809	0.0972989803066864	0.0384897839153931	0.0762981993301671	0.0693373167205258	0.278567051592448	0.121026719279027	0.145263571553298	0.0552170133367603	0.198754168243834	0.20594520279622
LO018260.3	0.00324850103932635	0	0.00634238073945817	0.00430665447022121	0	0	0	0	0	0.00306057455782016	0.00557286922648197	0.000597224078593733	0.0177425068422235	0	0	0	0.0340330529009774	0
LO018260.2	0.00712398405781063	0.00149615040500791	0.0288663064869099	0.0141956447604309	0.0193107976324962	0	0	0	0	0.00188384710856173	0.00239769744319135	0.00185632701330549	0.0121186112484172	0	0.00797352788741379	0.00521243812835942	0	0
CABZ01021435.1	0.0227810372610477	0.038739363301959	0.0505820392405893	0.00206018076438063	0	0	0	0	0.240465541287933	0.0277356117096625	0.0274689805265174	0.0239055226832167	0.011459413621805	0	0	0.0139717207725206	0	0.0711866519558442
CABZ01021433.1	0.0430711259725231	0.100710816784652	0.0666370616685289	0.0372829323188408	0.04806498583477	0.0295965511303905	0	0.107106330314931	0.0864012994755441	0.0323589800358664	0.103460818106641	0.0343747384053789	0.0607186236024615	0	0.199421703674402	0.0393938520995784	0.0638056728201306	0.0306183060728348
wu:fc30c06	0.00186123926418685	0.00652615371393931	0.0180668299372586	0.00272410385155595	0	0	0	0	0	0.00431739162751367	0.00901604070559526	0	0	0.0413156557414301	0.00631014355576589	0	0	0
si:cabz01021430.2	0.00586313931082798	0.0103725831881172	0.00121526307225067	0	0	0.00996348383175661	0	0.0219900077404827	0	0.0150431999757471	0.0206649405677899	0.00156702962559807	0.0226066338385164	0	0.0140683144854986	0	0	0.0853497204796654
zgc:171727	0.0030594112097524	0	0	0	0	0	0	0	0	9.39969593863578e-05	0.000445652419990684	0.00141496043067322	0	0	0	0.0105087495849044	0	0
si:cabz01021426.2	0.00634213326956691	0.0314314562326227	0.00336205370865021	0.00842935305005792	0	0.0671524023771951	0.29218407596786	0.0219900077404827	0	0.00570549699305187	0.0103404822560861	0.00735203846494371	0.00584901356386246	0	0	0	0	0
zgc:171727.1	0.0383004069482028	0.065308355726361	0.0110320846859316	0.0177222842433727	0.0155829989481476	0.0482849517361102	0	0	0	0.0454131285292598	0.138704608767353	0.0360216214364851	0.0374275549828837	0	0.0310800310800311	0.0246459562758353	0.00450254528885179	0
si:ch73-120g24.4	0.00871341275239761	0.00474394553950521	0.00121526307225067	0.00172537514400412	0	0	0	0	0	0.00713873422174439	0.0141567106821052	0.0018822826088376	0.00355568197980373	0	0	0.000791888276600874	0	0
si:ch73-266f23.1	0.00107325294811852	0.00196873898112849	0.00124407865214528	0.00555548148246912	0	0	0	0	0	0.000940747966935103	0.00613772847814519	0.00507213973203333	0.00405264384352742	0	0	0	0	0
si:ch73-266f23.1.1	0.00779436945195556	0.0254668536610951	0.00266333732736948	0.00712049976689055	0.0265681872525838	0.00910709488226803	0	0.0552095755487832	0	0.008175719448208	0.0303720294685701	0.0169217991517005	0.0226619192216949	0.0279454504806618	0.0370052433842303	0.0320855197215855	0.0493293717359844	0
znf1015	0.0200726179206149	0.0275340096096477	0.0296049624122435	0.0288758542898838	0.0463144607024857	0	0	0.0219900077404827	0	0.0252089232257316	0.0591112492128205	0.0420146302863602	0.073052645044851	0.0319521484624626	0.0708030880387061	0.0222169730221272	0.0262259214776466	0
CU570689.2	0.0160001573066694	0.0178542705489141	0.00435608945020895	0.0145643604447992	0	0	0	0	0	0.0160241217595207	0.0168294225724662	0.0130207255557051	0.0156776682463479	0.0217521344281908	0.0478240076518412	0.0152193176969359	0.0149555968330028	0
znf1015.1	0.00509175870170145	0.0214375959343255	0.00149476540628546	0.00453420353767628	0	0.00646684127138099	0	0	0	0.00598476516120613	0.030963982917846	0.00637315520581161	0.00614307815983393	0	0.00667902285895574	0.00674359762841159	0.0244398986233005	0
znf1015.2	0.00282586996719771	0.00260101431386432	0.000918098372220767	0.0069902304539176	0	0	0	0	0	0.0110179382226661	0.0116219666004443	0.00465678967754827	0.00222957735016962	0	0	0.00275172830639252	0	0
si:ch211-165i18.2	0.000864564874873255	0	0.0186982748341767	0	0	0	0	0	0	0.00591965187796244	0.077420336988662	0.120602454891539	0.00565331072009045	0	0.00799888015677805	0.0160690855108381	0	0
si:ch73-266f23.3	0.00611982315447994	0.0544537198982417	0.0133487115440656	0.0202039228081332	0	0.0671524023771951	0	0	0	0.0126541943739849	0.0389717482015694	0.00764882575437671	0.00987275456878119	0	0.00709710615496531	0.0017801042060627	0	0
znf989	0.00403431554087173	0.018353529089412	0	0	0	0	0	0	0	0.00122207767444973	0.00690158456731605	0.000305316923240761	0.0133500599292009	0	0	0	0.00454120851549256	0
si:dkey-262g12.7	0.00176529955895715	0.00909816412617738	0.0033829844719605	0.0096044793424798	0	0.0101595558242194	0	0	0	0.0045419254746853	0.000274465753782591	0.00310382254192838	0	0.0252818291909056	0.0588569405234953	0	0	0
zgc:173624	0.00818598972078242	0.00300076195504759	0.00131911938228278	0.00501062126442527	0	0	0.366501740883269	0	0	0.0131445349676013	0.0303102267177969	0.00766029662483619	0.0194401470818345	0.0428345965201965	0.0309501702259362	0.0112167645333197	0.0155531759196399	0
BX855614.3	0.00720918176429831	0.0120311005607204	0.00243580087735535	0.00252981577628535	0	0	0	0	0.0661222600588488	0.00366217653227788	0.0169493262235549	0.000970987760690031	0.00496287767499107	0	0	0	0.0118989399234422	0
si:dkey-262g12.14	0.0223019448913437	0.0562365813603228	0.0228876939254075	0.0260526160395503	0	0.0266308038508142	0	0	0	0.0316111236675607	0.0297271979510034	0.0129214434013159	0.0249312477282275	0.0301595439876949	0	0.0234765512252081	0.0225360798569419	0
BX855614.2	0.000431676508531331	0.00862990573724538	0.00165508724871372	0	0	0	0	0	0	0.000178549645514676	0.00673213789061644	0	0	0	0	0	0	0
zgc:171551	0.00360449364497424	0.0186476809470425	0	0	0	0	0	0	0	0.00408592120986052	0.000654351638990967	0	0.00390205072275734	0	0	0.00306760510842143	0	0
BX855614.4	0.0320983161793536	0.0177852323833858	0.0013857332663008	0.0116171063036542	0	0	0	0	0	0.0208520276297752	0.0165766291733002	0.00655010850526187	0.0340163492854285	0	0.0389490503827143	0.00134388660607351	0.0266753227401343	0
si:dkey-262g12.10	0.0165033699598807	0.0126247589281263	0	0.0095922320888112	0	0.00863188878674487	0	0.0523516354650919	0	0.0238030288447819	0.0146541490550844	0.00567328186514533	0	0	0.0637348629700446	0	0.00777658795981993	0
si:dkey-262g12.3	0	0.0141684631464259	0.00353267631535773	0	0.0041581338295373	0.0819202097157369	0	0	0	0.0026866448091691	0.00827034162506442	0.00140502546297314	0	0	0.0655200655200655	0	0	0
BX855614.1	0.0142149217560244	0.0537162630396503	0.0199218249615833	0.00946238512664456	0	0.00876916061594584	0.0674036128336479	0.0885959316748175	0	0.0209407159287971	0.0466903604548065	0.0112078392978543	0.0256801118796278	0.034854013962518	0.00603509407202885	0.00800221135337195	0.0123177964753125	0
si:dkey-262g12.12	0.00610551904265763	0.00402149084708683	0.00172595494498173	0.00823675529176115	0	0	0	0	0	0.00227152964666801	0.0163034016249774	0.00431066694129569	0.00512355451718184	0	0	0.0207754218449406	0.0184493335178267	0
si:cabz01032454.3	0.00289995901839987	0.00623913562643103	0.016008133145224	0.00396043682033954	0	0	0	0	0	0.00530353543158054	0.0191157814637734	0.00399773704707232	0.00741402511130305	0	0	0	0	0
CABZ01069022.2	0.00329144133635277	0	0.0063754570405766	0	0	0	0	0	0	0.00293760502400076	0	0	0	0	0	0	0	0
CABZ01069022.1	0.00586460876142686	0.000947947267589399	0	0.0069014764059327	0	0	0	0	0	0.0098357941454195	0.00473204958017526	0.00139649567282084	0.00390272839742264	0	0	0.0112249866071147	0.0398226092288087	0
CABZ01069020.1	0.000630901535218512	0.021699109415331	0.00319564471972438	0	0	0	0	0.0414593698175788	0	0.000200576923416361	0.00726486559787756	0.00878266678670171	0.0128657247546589	0	0	0	0.0125245010551892	0
LO018181.1	0.00298875083218994	0	0.00171127020154665	0	0	0	0	0	0	0	0	0	0	0	0	0	0	0
si:cabz01069013.3	0.00192852901791258	0.00121792740421914	0	0.00443169298649131	0	0	0	0	0	0.00141135798728401	0.00681067249302106	0	0.00402361864142517	0	0	0.0042355795458781	0	0
LO018205.1	0.00386819211747241	0	0.00365150803269809	0	0.0261263732674949	0	0	0	0	0.00293549228439292	0.00955554052217159	0.00728657253487427	0	0	0.0171732783788425	0	0	0
LO018205.3	0.00136205192577798	0.00147007370949579	0.0183539309959456	0.0171216221258336	0	0.0100284306007531	0	0	0	0.00210947820078493	0.00687555617141553	0.0191573504423619	0.0475543007329836	0	0.0310800310800311	0.00844901534997019	0.0282703893115312	0
LO018205.2	0.00243676222082733	0	0	0	0	0	0	0	0	0.00126712905050472	0	0	0	0	0	0	0	0
si:cabz01069012.2	0.0282777467164464	0.00269678435433589	0.00715617502637169	0.0126385191991921	0	0	0	0	0	0.00991179761426656	0.0195758984702746	0.00261660805410825	0.0236001917075361	0	0	0.0354837041344507	0	0
rab21	0.104234978245701	0.127228118754976	0.269572186836906	0.164435538001931	0.290520592886724	0.215133097445495	0.188058298072402	0.291488174117687	0.173976102293752	0.0583423463635428	0.132239026332821	0.13817189559461	0.114680029450464	0.123825437233601	0.0257677971783944	0.120566376396623	0.0957817904347057	0.127388708763904
trim24	0.0658288942920789	0.136997230408544	0.104084116755466	0.107089258063577	0.0663114770530722	0.0459945037360274	0	0	0.139330575081473	0.0426218441640745	0.096634712522371	0.0581563823752079	0.0567619494637652	0	0.14025808582221	0.0523913641297343	0.233462901356125	0.274578707751109
ptprr	0.028150627896094	0.0149619627791794	0.415379451409036	1.22201496879294	2.51646920747127	0.0266308038508142	0	4.13558368347553	4.71218142853475	0.0207833880450308	0.00868811823503501	0.646274634399223	0.916340435438802	1.99106028116656	0	0.168455572205713	2.38966698903491	4.84124469776453
ptprb	0.000414404525944322	0.00235967106928041	0	0	0	0.0266308038508142	0	0	0.0661222600588488	0.00823900530297945	0.00520442573434784	0	0.00300065564325805	0	0	0.202542773005716	0	0.0021316843759899
zmp:0000001020	0.00903902820497575	0.0106366895170582	0	0	0.00618394770853818	0.00968804495252858	0	0	0	0.0167340007126661	0.00556408821857268	0	0.0126946261843539	0	0	0	0	0
LO018124.1	0	0	0.00178926665587732	0	0	0	0	0	0	0	0	0	0	0.0381074324736297	0	0	0	0
CABZ01117780.1	0	0.0138374971761198	0	0	0	0	0	0	0	0	0.00573392496992322	0	0	0	0	0	0	0
PHF21B	0.0107849632623924	0.0198172195030639	0.00262788883819983	0	0	0	0	0	0	0.00559048594293189	0.0246432358538246	0	0	0	0	0.0147221853889965	0	0
nup50	0.116022362653438	0.143267058406447	0.31138219495038	0.151937841310025	0.495789559832222	0.33642698747148	0.0674036128336479	0.295289642269929	0.060084960133629	0.149788559068038	0.203764937684093	0.269649584967613	0.153984171422999	0.35317871813637	0.190500667609834	0.275434816546629	0.51256671451732	0.303887667828353
zgc:172139	0.217566657339754	0.236938084981051	0.31209928518281	0.246099443347155	0.139498436330958	0.252238907192101	0.134807225667296	0.0627321088025695	0.0865965811669755	0.179075987620537	0.264657600941421	0.239506557151905	0.0968093618478184	0.0769181884667685	0.155659259883541	0.174892304002591	0.0664888676908737	0.10644907197672
large1	0	0.00756747910951675	0	0.00197832507481531	0	0	0	0	0	0.000220940804832559	0.0244440965877146	0	0	0	0.00650596922676556	0.00175543553057688	0	0
CABZ01066312.1	0.0400015316999124	0.136787971209111	0.0153163082230695	0.00168845533858342	0	0.00732077819872253	0	0	0	0.0346236454134691	0.145513564507357	0.00877482437875396	0	0.0183082114159021	0	0.0409476637074942	0	0
CABZ01043953.1	0	0.00915313658065094	0.0026211275461633	0	0	0	0	0	0	0.00376979567626032	0.00123996865359244	0	0	0	0	0	0	0
naa40	0.000227485229497791	0	0.00103794692437643	0.00153532640194876	0.0193037149999517	0	0	0	0	0.00197725345263427	0.0040042166609425	0.00392234652041802	0.00611980122885609	0	0.00714043449543905	0	0	0
SLC2A13 (1 of many)	0	0	0	0	0	0	0	0	0	0	0.00674541048107477	0	0	0	0	0	0	0
abcd2	0.00199368227637778	0.00336800306856505	0.00525424531924793	0.033501095799991	0.0247270749106734	0.114172353268643	0	0	0	0.0171701760653114	0.0233430764790757	0.0266685735867718	0.0458445690464674	0	0.370435149517414	0.0535812636930334	0.0723737124305633	0
CPNE8	0.0571457410592746	0.188786247207084	0.282542660215419	0.109834787480735	0.04068878288227	0.938394288933984	0.433905353716917	0.390685364738918	0	0.0936020753737894	0.15594632736819	0.138937487923316	0.0240281154887413	0.052445081874254	0.736478149347122	0.178650058754955	0	0.0324304690743047
si:ch211-266c8.1.1	0.0317356155168424	0.0667664960637488	0.0282639305325099	0.0730052041013337	0.0705203637218053	0.00837805118151467	0	0	0.060084960133629	0.0324593094490011	0.0177858980549089	0.0258595215285602	0.0429105669300986	0	0.0399025296210453	0.0194620021561698	0.0507605454476302	0.0870631018077613
si:dkey-71l4.5	0.00906318465861783	0.00242679533509172	0	0.00385787734187622	0	0.00815078960774325	0	0	0	0.00226662446350063	0.00353544781396191	0	0.00798575341590602	0.0589556594485288	0	0.00198349415503942	0.0219205948372615	0
si:dkey-71l4.4	0.0324708798315562	0.0221227654915151	0.0288477404988226	0.0612481008166486	0.0958031692572043	0.0100284306007531	0.366501740883269	0.0402149084708683	0.0630859103927729	0.0311285406558175	0.0400372770052299	0.0223840495560682	0.0669672724554362	0.139679229130277	0	0.0168710471074133	0.179914817417637	0.0208280829207637
si:ch211-227e10.1.1	0.0101817744470828	0.00940006633500165	0.0037783870677809	0	0	0	0	0	0	0.00212549893744471	0.00107167754764818	0	0	0	0	0	0	0
si:dkey-165o8.1	0.0230777147334771	0.0557129249122055	0.0177001869543683	0.00426718009377555	0.0477312735133938	0.0182141897645361	0	0.0627321088025695	0	0.00500793203726756	0.00520760718235889	0.0103045132490766	0.0056618569192138	0	0	0	0.00470295656067143	0
si:dkey-71l4.3	0.0290128509687618	0.0710683046583284	0.00895783362844584	0.0323906837599399	0.0246575680240658	0.0181006102434754	0	0	0	0.0086034299796883	0.00955550757792023	0.00179050344958181	0.0207158634124926	0	0.0247463499133878	0	0	0
si:dkey-71l4.2	0.0146324991166828	0.000955222055695177	0	0.0196622510305066	0	0	0	0	0	0.000858481419799047	0.0051849132680885	0.00127385975179185	0.00299385959397276	0	0	0.000578518497434733	0	0
si:dkey-84h14.1.1	0.0137850640889415	0.00107853224703565	0.0190403163356491	0	0	0	0	0.0552095755487832	0	0.00535215614594944	0.0015985626344273	0.00221718530807529	0.00989849806967659	0	0	0	0.0282703893115312	0
si:dkey-165o8.2	0.000858098705549522	0	0.00243573199348588	0	0	0	0	0	0	0.000161830837578156	0	0.00890642285031077	0	0	0	0	0	0
si:dkey-261j11.1	0.00731968917892183	0.00838153320352491	0.00124407865214528	0.00483562033997312	0	0.00963646438121853	0	0	0	0.0017533613059218	0.00343964492917726	0	0	0	0	0	0	0
si:ch211-106j21.4	0.00740802268611806	0.0252701932810095	0.0196566729037042	0.0121360549798578	0.0688885066825951	0.010769015388923	0	0	0	0.00553787179594022	0.0369061054383391	0.0253509951175198	0.00452971379003418	0.0603786010450405	0.00709710615496531	0.0256969159634509	0.0512890957524756	0
CT737182.1	0	0	0	0	0	0	0	0	0.05780848050409	0.00104276898956241	0.00212698165563401	0	0	0	0	0	0	0
si:dkey-261j11.2	0.0116609951125553	0.0202651612994125	0.00363736603193136	0.00271813953134382	0	0.00815078960774325	0	0	0	0.0210799208319868	0.0191748917927533	0.000643652485843829	0	0	0	0.0229699808714205	0	0
si:ch211-232d10.1	0.0164917794788292	0.00357864977543973	0.0201262254934487	0.0050589442893878	0.0131546060853208	0	0.0674036128336479	0	0	0.0125962692310837	0.00579342383569408	0.00243401560870273	0.0127024054181449	0	0	0.0163297940062005	0	0.0341611724114372
si:dkey-261j11.3	0	0	0.00135097125376347	0	0	0	0	0	0	0	0	0.00130044761406876	0	0	0	0	0	0
si:dkey-71l4.1	0.00547648236830552	0.00569189280709461	0.00461605395458406	0.0100132169719609	0	0.00895599917604808	0	0	0	0.000181194950256188	0.00104377365464864	0.000463636437818194	0.0107572571145809	0	0	0.000578518497434733	0	0
si:ch211-232d10.3	0.0390568322592752	0.0150235452817722	0.0109045840786919	0.00269844572224844	0	0.011215728938263	0	0.0219900077404827	0	0.0231504441337337	0.0139155046298243	0.00241296434335203	0	0.0399673866125242	0	0	0.0263390093898568	0
zgc:110171	0.0474501213770565	0.0420324886315128	0.0140676076907341	0.00192754103397542	0	0.0382955047501478	0.0674036128336479	0	0	0.0328135530079983	0.039826934446567	0.00328615865822661	0.00496287767499107	0	0.00605455150909696	0.000578518497434733	0	0
si:ch211-106j21.2	0.00962084269077148	0	0	0.00192754103397542	0.021998570092944	0	0	0.0744180508424123	0	0.0025555572275814	0.00438103150095241	0.000807904708682316	0.0113136558960561	0	0	0	0	0.026770823015412
BX957252.2	0.0100245944068831	0.00931384876172381	0	0	0	0	0	0	0	0.00603455529791276	0	0	0	0	0	0	0	0
BX957252.1	9.58189377755938e-05	0	0	0	0	0	0	0	0	0	0	0	0	0	0	0	0	0
si:dkey-238k10.3	0.0111169560535118	0.0261837749650633	0.00557703095315885	0.00530540567784516	0	0.0265077523552814	0	0	0	0.010654363100644	0.0130493401961066	0.0039291290777248	0.0137615208701948	0.0328157200425292	0	0	0	0.0298055486009275
si:ch211-106j21.6	0.00152897179857387	0	0.00157193504890133	0	0	0	0	0	0	0	0.00161862532740744	0	0	0	0	0	0	0
BX957252.3	0.000252737347665091	0.00277667833337087	0.00118931208048503	0	0	0	0	0	0	0.00122404773982033	0	0	0	0	0	0	0	0
zgc:174944.2	0.0294558828427561	0.0202755045051219	0.0188579927802218	0.00193394681994356	0	0.0187065339750803	0.0674036128336479	0	0	0.00752998984906281	0.0064637217685743	0.00169529389159026	0	0	0	0	0	0
si:ch73-389k6.1	0.00266913504349234	0.00674747614686698	0.0143847116977364	0.0225504270368143	0	0	0	0	0	0.00848585015372516	0.0173501467091705	0.00718224520374883	0.0206354232331998	0	0	0.00198349415503942	0.0125120898067758	0
zgc:171673	0.000415344440528721	0.0266849298732813	0.0178313865263884	0.00569306900722155	0	0	0	0.0552095755487832	0	0.00270959468027085	0.0324976793559279	0.0203301849588573	0.0300569243282588	0.0277308663954588	0.00606943432872056	0.0195380746700732	0.0635209873822489	0.0021316843759899
si:ch73-158p21.2	0.00160197136573786	0.00612024693134807	0.0295799365904439	0.00779212441260845	0	0.129016423838217	0	0.0427745269137323	0	0.0097683339020341	0.00884723178955588	0.0525117026018638	0	0	0.0257719447755941	0.00290816029779561	0.0087025158102956	0
si:ch73-158p21.3	0.0958561574493628	0.203770838249422	6.78632822472074	0.396500272699588	0.200660344995888	2.97072760414511	0	0.156823860203647	0.178909076676322	0.127458350904746	0.271226238245625	3.99086634051839	0.271779994442931	0.137689678953967	2.44920890601453	0.0951075103554434	0.347418000157595	0.58250386919172
zgc:123107	0.0746844757529311	0.279818678400254	6.19007498672487	0.133917646248438	0.134457460551414	1.48885780939776	0	0.166890414906272	0.240158384516041	0.156937347576506	0.420905854793408	4.59391100389196	0.167518339833169	0.106641831723616	3.83748259364082	0.193932782670281	0.196508094107486	0.76692745765218
FP074874.3	0.00164179996440578	0	0	0	0	0	0	0	0	0	0	0	0	0	0	0	0	0
FP074874.1	0.00562240915070119	0.0069200151194432	0.00247443353411712	0	0	0.0671524023771951	0	0	0	0.00528676413489636	0.00225454239502202	0.00198688823321634	0	0	0	0	0	0
zgc:172128	0.0259322743998898	0.0310443007168238	0.0181410378661543	0.00888484958623223	0	0	0.188058298072402	0.108350791661641	0	0.0250073823345953	0.0308212579290199	0.00865731204850285	0.014481882621812	0	0.00631014355576589	0	0	0
zgc:113209	0.00695147292736517	0.0019493985832506	0.00987083417518337	0.00236439486150794	0	0.134834490662712	0	0	0	0.00427395410618056	0.0220072443472562	0.0083128395767989	0.00775364778974504	0	0.00888355875363671	0.0226746484757169	0.0147891802357395	0
zgc:172128.1	0.000778108387385929	0	0.0013417779470207	0	0	0	0	0	0	0	0	0.000734542345962247	0	0	0	0	0.00450254528885179	0
si:dkey-16p6.1.18	0.00251441214877422	0.00770375204332825	0.0107814864132266	0.0125022858018363	0	0	0	0	0	0.0048012758748967	0.0146866492435309	0.00764077835924327	0.0205872497544433	0	0.00799888015677805	0.0071215961018877	0	0
zgc:113119	0.014432558914894	0.0769736312776212	0.0123486513288493	0.00500725300597916	0	0.0426757708311106	0	0.0523516354650919	0	0.0137225416482366	0.0445417803522478	0.0118003512867877	0.0199804352101794	0.0371622877104315	0	0.00372767680743865	0.0425172726452122	0.0294151387953324
zgc:153116	0.00397187713569008	0.00286355304793946	0.00555436680683962	0.00396043682033954	0	0.026073899822066	0	0	0	0.0113837382843804	0.00448290136618307	0.00234859737517664	0	0	0	0.00929727314706303	0	0
ftr51	0.0548582678515669	0.037188748460877	0.0140065245026958	0.0279533256676675	0	0.00690202574455603	0.0674036128336479	0	0	0.0603665413938368	0.0621629555842056	0.0101056726678288	0.0244938235064416	0.0314035831488373	0.166149354306346	0.020283888319637	0	0
ms4a17a.17	0.583635883166774	0.352431516400103	0.0294142925489528	0.0445139381562911	0.067108572215966	0.124992541588268	0	0	0	0.78184090338656	0.746314012525539	0.0783142690753509	0.107190123337003	0.0370982426695194	0.34883194756478	0.0998968785143024	0.128530270970689	0.0873255872945691
ms4a17a.16	0.338817432975291	0.501180882011554	0.0455909027452577	0.0532447799792156	0	0.0213971734582359	0.0674036128336479	0	0.0874974844473221	0.222547740993044	0.277413395845347	0.0114730386455084	0.0056165733847437	0	0.123899341092633	0.0172793340868667	0	0.0149217906319293
ms4a17a.11	0.00602477131467288	0.416182223135537	0.00345839333642793	0.00652510636753177	0	0	0.29218407596786	0	0	0.0232273579378868	0.525476041953829	0.0284649784078853	0.0118686647988892	0.0774988499883257	0.0359485935112789	0.288789891369524	0.0212921798082	0
ms4a17a.9	0.00304943676459428	0.0104382405345622	0.0351917520791864	0	0	0	0	0	0	0.00378468620965598	0.0444587844787654	0.0346218364566701	0.00328296714570629	0	0	0.0811471220719007	0	0
ms4a17a.8	0	0	0.00483260538479352	0	0	0	0	0	0	0.00245226422460386	0.0137520825300806	0.00932135436785199	0	0	0	0.123862074887977	0	0
ms4a17a.5	0	0	0	0	0	0	0	0	0	0.00243258811807199	0.0375453469169637	0.0004221730165499	0.00388787372186151	0	0	0.00721100467843924	0	0
ms4a17a.2	0.00186099949429715	0.0149689132673281	0	0	0	0	0	0	0	0.00353265887365601	0.062723071768209	0.0018057350029401	0	0	0.0257698750161062	0.00348567110322885	0	0
ms4a17a.1	9.01876552580485e-05	0.00180456229439268	0	0	0	0	0	0	0	0.00310655558559081	0.0307936331610632	0.00250743050029862	0	0	0	0.00348567110322885	0	0
ms4a17a.7	0	0	0	0	0	0	0	0	0	0	0	0.00122882005748912	0	0	0	0.0134202968569665	0	0
ms4a17a.3	0	0.00098388494842967	0.0266635163600773	0	0	0	0	0	0	0	0.00365717255521933	0.0105154043264487	0	0	0	0	0	0
ms4a17a.6	0.00751821505974742	0.00677984184384094	0.38297725151796	0.246335815134444	0.00399147421108512	0	0	0.306350291988291	0.180217989274731	0.00350872629340193	0.0126184994144482	0.495957830163363	0.470622079549389	0.0114387290199411	0.00796923873846951	0.0447980633278826	0.230639849574485	0.284234009678003
ms4a17a.10	0.0151363777117151	0	1.9150998156573	0.00580123798418582	0.0142594361818934	0.0093648742297391	0	0	0	0.0383020137965112	0.0445701640334565	2.70028338048005	0.0507991351246079	0	0	0.055363961472538	0.0146010553642817	0
ms4a17a.4	0.000672001350214884	0.0598622609741486	0.00236139441284636	0.00743689054681969	0	0	0	0	0	0.0108767807914351	0.0671886000282479	0.023114253254925	0	0	0	0.0243245922728791	0	0
ms4a17a.12	0.00221636920134285	0	0	0	0	0	0	0	0	0.00343682623892467	0.0148829792894426	0.0499375566932626	0	0	0	0.0183954473087603	0	0
si:ch73-56d11.5	0	0	0.00607942805678178	0	0	0	0	0	0	0.00168421471227901	0.00675290039467345	0.00703706449248253	0	0	0	0.0116759879860209	0	0
ms4a17a.5.1	0	0	0	0	0	0	0	0	0	0	0.00123929512363394	0.000663540946448264	0	0	0	0.00733161480282355	0	0
CABZ01015815.1	0.00602596741353364	0.0101443272803039	0.00470009183979455	0.00261251037166618	0	0.0144584341157088	0	0	0	0.019146901335462	0.0178543309800239	0.0156764745722738	0.0285362965439348	0	0	0.00120158570862796	0.00454120851549256	0
CABZ01015815.2	0	0.0108765237790129	0.00137885617813057	0.00947342958593085	0	0	0	0	0	0.00199773643428307	0.0135743613472537	0	0.00577978762775924	0	0	0	0	0
CABZ01015815.4	0.00640057641254895	0.00285058650817406	0.00390179171196681	0.0050520819124353	0	0	0	0	0	0.00553491305715609	0.001964385657521	0.00185328095049655	0	0	0	0	0	0
CABZ01015815.5	0.00630147693616227	0.00793355296038026	0	0.00293907416812445	0.066723643181879	0	0	0	0	0.0107561315422617	0	0.00297131316643001	0.0101434198702813	0	0.0359485935112789	0	0	0
CABZ01015815.3	0.00414585426139518	0.0296494273061651	0.00761986871610006	0.0186443282010007	0	0	0	0	0	0.0084322475635382	0.0270726411370152	0.0153112249229134	0.0294526792772537	0.0381074324736297	0	0	0.0273863920774866	0.0298055486009275
si:dkey-240n22.6	0.0850040018286424	0.035797215282905	0.00132872549049569	0.00730784427197688	0.0179018976011457	0.0271909073605786	0	0	0	0.11147635579716	0.0343829258955219	0.00528657164772112	0.00876354661515939	0	0.0942608911371203	0.0285635966239719	0	0
BX005417.3	0.00378307012051215	0	0	0	0	0.011215728938263	0	0	0	0.00207031676809346	0	0	0	0	0	0	0	0
si:dkey-240n22.6.1	0.0690714281282196	0.0647327675373405	0.0289506979139347	0.116332529040826	0.106060153934276	0.0441452378324688	0	0	0	0.0712441718047295	0.0848607388133052	0.0265990792596873	0.0273371001952196	0.0870102892359438	0.0152061760665922	0.0186584281145599	0.0757831530387194	0
si:dkey-240n22.3	0.0422898113907654	0.0574266429969311	0.0064464587305992	0.00270983322602394	0	0.0185226696134999	0	0	0	0.0462367488798472	0.0265864512357408	0.000956800825451208	0.00997864569820584	0.0275680310085213	0.00768447543849538	0.00498910723639764	0	0
BX005417.1	0	0.00438533019343692	0	0	0	0	0	0	0	0	0.00803373572091125	0.000305862076084721	0	0	0	0	0	0
trpm2	0.0271931756815432	0.0430545026779745	0.00172925084875955	0.00680451330717865	0	0	0	0	0	0.0235689782115797	0.051847422945863	0.000472185845549332	0.00343449642554785	0	0	0.0440923471921939	0	0
si:dkey-172k15.6	0.00641803059504639	0.0187876995745613	0.0119482685524355	0.0227751682719969	0.0535690370965582	0.010250943086764	0	0.0744180508424123	0	0.00476136173154454	0.00310514335931798	0.0144534245247333	0.0166110054056596	0	0.00693397125868913	0.029056106872048	0	0
znf1009	0.00139625262739223	0.0165159912688377	0.00419553350640212	0	0	0	0	0.0496978371501272	0	0.00351043207452757	0.00859074693872928	0.00486276786760594	0.00564195584041164	0	0.00718971870225578	0.0323659650077091	0	0
znf1009.1	0.0222656622721264	0.0998247090748718	0.0708156877337264	0.0845829381521861	0.0228287048134324	0.111021438219727	0	0	0	0.017732428928395	0.100120435923719	0.0241308182215759	0.0543984922944264	0.044718312751461	0.0195628606831538	0.0438122249278357	0	0
si:dkey-240n22.8	0.00218402907739838	0.0288615228825216	0.000752257638010315	0	0	0	0	0	0	0.00869097562700931	0.0227888390878526	0.00624569596161643	0.00929743902042183	0	0	0.00138029654290928	0.01055597251647	0
BX005417.2	0.00237217313488882	0	0	0	0	0	0	0	0	0.000218245383935533	0.000570734362763099	0	0	0	0	0	0	0
CU467646.6	0.00612397063075005	0	0.00790785259029397	0	0	0	0	0	0	0.00364953009220015	0.00181520781632492	0.00167532097880546	0	0	0	0	0.0155209128780118	0
si:dkey-172k15.11	0.0157423595135142	0.0104663742971024	0.00640418660033863	0.0274866251064473	0	0.027425937538009	0	0.0881275738780489	0	0.0120693247625029	0.0102126042584816	0.00494142224610041	0.0474336261946771	0	0	0.025100741582648	0.0240091933449211	0.0193866828997825
CU467646.4	0.00416552764678554	0.00248606719150524	0.000700348822738141	0	0	0	0	0	0	0	0.000384774592502544	0.00162913277230877	0	0	0	0.00318623749322128	0	0
znf1009.2	0.00476981204212041	0	0.00121974945126522	0	0	0	0	0	0	0.00254431442952185	0.00877293848206417	0.00273636511171105	0.00564195584041164	0.0361697664156485	0	0.0105058349407261	0.0118989399234422	0
psmb10	0.26001170965653	0.513823662406601	0.579985638922752	0.604435512802232	0.771164816719024	0.294117148187458	0	0.545380527135771	0.912963946989497	0.392094774505299	0.66105041150923	0.784281374675484	0.666488672736886	0.868321472678697	0.324599003653001	0.556348289781893	0.644000252778821	0.668589888175805
si:dkey-172k15.4	0.00241674790718041	0.00486731694020988	0.00338298992934127	0.00206018076438063	0	0	0	0.115901715345387	0	0.00668264163645415	0.0107115697647812	0.00696407168870016	0	0	0	0.00772815758365366	0.0163791310215828	0.0208280829207637
si:dkey-172k15.3	0.00272097706304221	0.00790657589917534	0.00721277484384512	0.00274094405787997	0	0	0	0	0	0.0097333193210338	0.00629606533125561	0.0017766227790747	0.00203900826715902	0	0.00631014355576589	0.00417905456575236	0	0
zgc:174310	0.0145138516258483	0.021723858522145	0.0118767947380522	0.00622255897027354	0.0225692877132798	0	0	0	0	0.0210788611726536	0.0105366907819117	0.00771174173034045	0.0100049194661147	0	0	0.0136371869173885	0.0384827320738915	0
zgc:162948	0.0174371649791503	0.0319387207410217	0.00777868891968092	0.00192754103397542	0.00775990843308049	0.0149972207343577	0.310655483069276	0	0	0.023492962749561	0.0544512600667571	0.00543011421025915	0.012321200533521	0	0.0310800310800311	0.0228330787722603	0.0176436857659565	0
LO018029.2	0	0	0	0	0	0	0	0	0	0	0.0012637789822434	0	0	0	0	0	0	0
LO018029.1	0.0225882166461631	0.0933406225559262	0.065047682609038	0.0555729678666018	0.0656814953504146	0.0130677103411326	0.310655483069276	0.0219900077404827	0	0.0333099657663344	0.11519666456389	0.0573119336474945	0.0839648781169199	0	0.0809993903956713	0.0521277599807211	0.0994473786673055	0
slco1e1	0.000555422408461527	0	0	0	0	0	0	0	0	0	0	0	0	0	0	0	0	0
slco1d1	0.104738603575502	0.00395572749784413	0.00636911588646046	0.015330860666164	0.0169396778073281	0	0	0	0	0.0524504293470653	0.0220464563876362	0.00676414249543195	0.00380364084501685	0	0	0.0109570334325037	0	0.077590654981514
CABZ01087415.1	0.00546768229916825	0.000947947267589399	0.0307872041029499	0	0	0.13195083102484	0.310655483069276	0	0	0.0123718976158158	0.00424091998605312	0.0111004454600328	0.00432734644952042	0	0.0634559019675499	0.00366421342380754	0	0
AL935186.10	0.00327550478419656	0	0	0	0	0	0	0	0	0.00333410475904024	0	0	0	0	0	0	0.00719086644907105	0
RF00002.2	0.00192226513572345	0	0	0	0	0	0	0	0	0	0	0	0	0	0	0	0	0
AL935186.8	0.00259527561315077	0	0	0	0	0	0	0	0	0.000929691520915828	0.000366820552779498	0	0	0	0	0	0	0
AL935186.2	0	0.0108075587489675	0.0228286256376141	0	0	0	0	0	0	0	0.00640482872847497	0	0	0	0	0.00440553476143148	0	0
si:dkey-61p9.11	0.0576364412682559	0.0189895405361314	0.00481486367676472	0	0	0.0102982899689507	0	0	0	0.054329054162479	0	0.0103008713189101	0.00222957735016962	0	0	0.0228185469149325	0	0
si:ch211-250m6.7	0.0399473050894402	0.132993584293688	0.0130275859337729	0.0086643475842731	0	0.102953924794905	0	0	0	0.0446385035599882	0.147524726843705	0.00814126077147624	0	0	0.199346419567509	0.0508325244995267	0.0125245010551892	0
si:dkey-61p9.9.1	0.0030918799534876	0.00149370998724372	0.0134487158757678	0.0219525483526223	0.0533115390125388	0	0	0.122100997392846	0	0.000492423376952853	0	0.00701590157342335	0.0428464858249762	0.0301595439876949	0.00888355875363671	0	0.0245676386296758	0
si:ch211-250m6.4	0.00317484639074904	0	0	0	0	0	0	0	0	0.000494890839215003	0	0	0	0.0589556594485288	0	0.00596422419757328	0	0
si:dkey-61p9.7	0.00317116577078586	0.0124997615251111	0	0	0	0	0	0	0	0.00573420745797629	0.0257906921094193	0	0.0181265178959238	0	0	0	0	0
si:ch211-250m6.2	0.00278864658021362	0.00212070684486006	0	0.0089310466129619	0	0	0	0	0	0.00606487776873049	0.00264267957536034	0.000864450676173319	0.0031646120422982	0	0	0	0	0
gbp4	0.0280575214588571	0.00345119630765083	0.00292357739454876	0.00337354600167328	0	0	0	0	0	0.0163174040733731	0.00731863673213732	0.00544121089659252	0	0.0352288820466571	0	0.00275015574148011	0.00454120851549256	0.0243358147752466
AL935186.1	0.0484407435659105	0.131039220621257	0.409131433534622	0.0453922109358562	0.0246575680240658	0.0101595558242194	0	0	0	0.933127081726661	0.182422809207	0.0779776833706854	0.0761769489481215	0.0183082114159021	0.152427385050381	0.130525862540404	0.035816262438372	0.0936902165429535
si:dkey-238k10.1	0.0144680647196003	0.00666664109862308	0.0220632462030005	0.0383228897324885	0.0258758991874968	0.0369289855607666	0	0	0.0527339939144971	0.00195653671505671	0.00848225016926598	0.00118037049605886	0.00333213376517787	0	0	0	0	0
si:dkey-61p9.9.2	0.00270546758890398	0	0.0148958233894458	0.0103122682162885	0	0	0	0	0	0.00178243016828719	0.0130901603722843	0.00420388895549058	0.0752192215676113	0	0	0	0.0684023028751733	0
si:dkey-238k10.2	0.0362776383555324	0.0889934132516303	0.141705195379847	0.182711092445625	0.146092054396417	0.213072830304351	0	0.147811844426013	0	0.0161750489641056	0.0578616665365467	0.0307588443205828	0.0778547175734054	0.0292513126526553	0.0237836235555146	0.0135641922230839	0.0249146557528298	0.152146745906473
si:dkey-238k10.3.1	0.0479296315977224	0.221974056380281	0.194925517261132	0.502737178528955	0.444675706287165	0.0698395559104832	0.0674036128336479	0.234968734199713	0.158690305659766	0.0448637576946906	0.155491191125207	0.258762318042881	0.490706162414893	0.514069712994279	0.0446973128301435	0.0827973403454934	0.204395943991156	0.422824487766875
si:dkey-207m2.4.1	0.0135019829398322	0.0182885831343368	0.0171701926597568	0.0191324759359258	0	0	0	0	0	0.00896442018370838	0.0184837590035717	0.0254069347831725	0.0241686471528984	0.0217521344281908	0	0.00297462109279722	0	0
BX005376.1	0.0166681869457448	0.0219480350675547	0.00714138457749774	0.0158414917096787	0.032249742002064	0	0	0	0	0.00257800072621582	0.0116772964883844	0.017072756991288	0.02814895499506	0.0415976622740485	0.00796923873846951	0.00906857413480033	0	0.0531976159164277
ttll1	0.00879124284057525	0.0223403799448644	0.0491789625078002	0.0295772367835355	0	0	0	0.150041445852964	0	0.00486344066470798	0.0280214222562523	0.040147796708768	0.0393808570115654	0	0	0.00854177485075149	0.0516247267760057	0
pacsin2	0.0798598693067182	0.235905917335163	0.369434397736442	0.209930616167652	0.112152541127056	0.307155468900596	0.0674036128336479	0.172034131571704	0	0.0548211753884186	0.255586792511017	0.460610034309602	0.251667717059566	0.112556535425849	0.24892500331357	0.184873973908172	0.298664924851877	0.0042633687519798
arfgap3	0.113821153924142	0.980735532496325	0.0985528495007958	0.0496169595176684	0.0347403161368768	0.494783072004737	0.0674036128336479	0.156850397475546	0.277547631178069	0.160598043288673	0.999362476081491	0.117726943788677	0.0953088657406446	0.127951572694704	0.60049742102807	0.265079173031321	0.164063130059676	0.386756784487514
ikbip	0.0274951464997594	0.169590311075478	0.0589388079936041	0.0206370466529489	0.0189492633473874	0.0255658906168442	0	0.165679324861643	0.0972989803066864	0.0216586906247064	0.120719287338749	0.0222703604109803	0.0244365990207446	0.0731294446199562	0.00799888015677805	0.09973255953299	0.0621202367126744	0.0347945901371255
terfa	0.0521343019285396	0.161718393298057	0.217991598346411	0.278731126597934	0.277155157838633	0.166632786967627	0	0.198713513293349	0.193992053373189	0.0636039700031877	0.125399603550946	0.221126441093651	0.308122892466136	0.171811139193058	0.176370637968347	0.0824131707167124	0.342500451955591	0.178304031198484
ckap4	0.00166628866186876	0.258959967180425	0.0845186755094584	0.0224670273290745	0.0394901435983263	0	0.29218407596786	0	0.240465541287933	0.0262952685238982	0.304017662054022	0.0652315992992458	0.0433665385865572	0.020746070175657	0.0444049555227515	0.593007767560206	0.0151530304545606	0.0591746103890769
cct2	0.00630399624725349	0.0351778240261417	0.0167545297814175	0.0141420825419507	0.00816943406245532	0.0249895108848808	0	0	0	0.00495081897330776	0.0163887647713621	0.0154454907834877	0.0239575281870718	0.0114387290199411	0.0648069209582073	0.00134388660607351	0.0477121482163368	0.040077911459878
cct2.1	0.480211298261131	2.13368714247519	1.61641246229005	1.31254920252836	0.810608135826762	1.9666160303899	1.12791592127778	2.40064666077421	1.80179109459513	0.554634675116652	2.03585188678159	2.10575718125458	1.69459225729382	1.14306598279382	1.76511101945896	1.61218985335867	2.70276209721501	1.09320850761472
CABZ01075274.1	0.00270613207303957	0.004034145003308	0.0101178187598386	0.0109520881798801	0	0	0	0	0.0757363466301113	0.00374579436127981	0.0223397142425409	0.0116145238159576	0.0102517914607301	0.0548989396089713	0	0.00623313935803651	0.0110285075892675	0
FO704772.1	9.23395785105753	3.22146600905928	1.58459863429885	2.11883986258199	1.96726964617631	1.90001254545201	1.61939121407268	3.71670078026076	2.35590098592862	10.2598749809709	2.29129361027145	1.09837134333909	1.77361336411192	1.20380764016731	1.25038827732807	1.46730385339077	1.43091972008459	1.5248731242011
FO704772.2	0.00671657575045954	0.00474833808167141	0.0101500592416762	0	0	0	0	0	0.0865965811669755	0.0126329195781778	0.0477502876983374	0.0102864782665482	0.0157368295953929	0	0	0.00120158570862796	0.0361759959868542	0
NRXN2	0	0.011255937507035	0	0	0	0	0	0	0	0	0	0	0	0	0	0	0	0
nrxn2b	0.000416764606349159	0.0109810401563923	0.00686987292796045	0.00121299986511441	0	0.0173975069372559	0	0	0	0	0	0.00111383629725172	0	0	0	0.0107274958591866	0	0
MAP3K11	0.0157200830120127	0.0149608268220964	0.00103016254110606	0	0	0	0	0	0	0.00327522654148515	0.0077331084203615	0.0032523783476849	0.00638769474484353	0	0	0.00495083719857601	0	0
drap1	0.167536963571281	0.349409227265793	0.384402392594497	0.298382694913327	0.40594656172525	0.378134521260913	0.0674036128336479	0.434596529310015	0.0874974844473221	0.177415451265709	0.465960744443219	0.462363740737937	0.351536177355747	0.761774642312567	0.48426205485881	0.438880222399622	0.511328816013672	0.209797845357395
zgc:63470	0.0191170417207947	0.0180297180165322	0.0425847877553234	0.0706611966884737	0.139735020472723	0.0179968438107886	0	0.0219900077404827	0.240465541287933	0.0173961042489918	0.0554087597303	0.050753573309342	0.0768256159321392	0.106315973056608	0.0490733100240155	0.0557093821755716	0.20165104255149	0
rela	0.0390891407493133	0.0983169577674102	0.0666345386473816	0.0903664839942564	0.0215658999989217	0.0535123179206968	0	0.0627321088025695	0.0874974844473221	0.0320594931025251	0.077219148348857	0.0608115913589336	0.0673090327504455	0	0.108664484051021	0.00120158570862796	0.029930018290115	0.1644803269395
CABP4	0.000351761797214084	0	0	0.0068970273811987	0	0	0	0	0	0	0	0	0	0	0	0	0	0
cabz01076234.2	0.0127883752442741	0.0207272311021659	0.0284673723858205	0	0	0	0	0	0	0.0189667572692363	0.0237446754176827	0.0105180326755989	0.0161582509356672	0	0	0.0556816432059602	0	0
zgc:175177	0.0270059993884264	0.0155750446611438	0.0226618811064406	0.00402637274145654	0	0	0	0	0	0.0124804617250213	0.032864443074004	0.0146953338283265	0	0.0107228831688264	0.0724244070251675	0	0	0.0417641162712997
si:cabz01080528.1	0.0276429789237606	0.0669165985387089	0.01960719593565	0.0681995953177178	0.0041581338295373	0.0249554967222987	0	0.0611845325501713	0.0527339939144971	0.0291610189506678	0.0503501464984106	0.00571761929156522	0.0614557773404204	0.0217521344281908	0.0988204239874619	0.0862179745218076	0.0164395990897517	0.0348122748080973
CABZ01112025.1	0	0.0112018460642314	0	0	0	0.0101595558242194	0	0	0	0.000243814808414225	0.0180069917466225	0	0	0	0	0	0	0
CR926130.2	0	0	0	0	0	0	0	0	0	0	0	0	0.00424719525843121	0	0	0	0	0
CR926130.1	0	0	0	0	0	0	0	0	0	0	0	0.0123231493159844	0	0	0	0	0	0
epdl1	0.248724866538771	0.286684337070438	9.28912425821768	0.193270365262685	0.144394020447772	3.14539785810214	0.359587688801508	0.0552095755487832	0.133544827134201	0.253918970857227	0.394980364252316	5.31035078596714	0.0862804277493804	0.124889540268188	1.41699765467706	0.21327346161776	0.140537838040442	0.354810415192188
dctn1a	0.0746594289481353	0.082035482689944	0.102976567625109	0.0500479833751289	0.0867482905922806	0.0869365948844295	0.378059095902924	0.0552095755487832	0	0.0583932963783969	0.0732718349095044	0.0455877983447284	0.0496892056157466	0.0611433368965906	0.145900985580252	0.0779514224294437	0.0118989399234422	0
CT030017.2	0.0512151637807304	0.0661640873063866	0.0556601085066802	0.0395626620158047	0.0179018976011457	0.0662701842050578	0	0.123916641352741	0	0.0316868718016627	0.0212960946046131	0.0237706403025913	0.0154547651096016	0.142720006864137	0.0208252259769425	0.028096069889797	0	0.281038762456093
si:dkeyp-74b6.2	0	0	0	0	0	0	0	0	0	0.00105404733094135	0	0	0	0	0	0	0	0
ripk3	0.00688737286337109	0.0232659156312406	0.173583371463741	0.0913034215863372	0.138022217538482	0.232069797314298	0	0	0.118824116542693	0.00148518048039226	0.0210536293923913	0.104050077773285	0.0327576274699926	0.0275680310085213	0.289487918299619	0.00479220519072498	0.00719086644907105	0
khnyn	0.346375551669932	0.605531436007942	0.828947461319154	2.04614836122231	0.871197823037305	0.433825445535416	0.359587688801508	2.73186626863942	1.23055813685807	0.216636218838684	0.589645541292392	0.634053401042577	1.36781017841733	1.42763155504689	0.368624639690112	0.743827719646339	1.34402947780264	1.55004248058661
si:cabz01090193.1	0.00254181808223617	0.00101911866617749	0.00343590187613986	0	0	0	0	0	0	0	0	0.00266909326327983	0	0	0	0.0167046211574318	0	0
si:cabz01101003.1	0.0419476668744089	0.174696330718732	0.271254248357481	0.565900142035565	0.380056405258449	0.353763529690847	0.0674036128336479	0.533810381247311	0.533433982487878	0.0418071074902443	0.166545588990331	0.25637336663892	0.546508933538759	0.422615186737144	0.236961377764089	0.306936559487187	0.645124607753014	0.640382934949418
emc4	0.227205084811331	0.31550101494395	0.360044684548049	0.290410668295536	0.325717250296068	0.582227513625627	0	0.455716611408836	0.170627434552216	0.209991387187677	0.60483191774389	0.506002966997643	0.288449432101855	0.578321140228876	0.547768842072873	0.386721519721398	0.388831035429153	0.187497798197356
lpcat4	0.0474552336621209	0.207930832185283	0.0271471059260326	0.0240799006681028	0.0256364242315482	0.298047535660173	0	0	0.277113181925363	0.0211772102138072	0.16573184554446	0.0945749465273265	0.0238759324575316	0.0314035831488373	0.232848146526075	0.181239337996422	0.0087025158102956	0.0830468879664998
nop10	0.315690566010186	0.88352174222263	0.608237429138028	1.09894064392234	0.31101429446754	0.646553017390684	0.359587688801508	0.499534726114795	0.323065730816355	0.344008419518422	0.728487004637937	0.948040797354713	1.03841146050153	0.118120166924311	0.376479207162042	0.977555219623057	0.429619307991939	0.31400345884976
si:cabz01102082.1	0.0290411094099318	0.0957166857716738	0.232978082473618	0.0316695395662796	0.158738070156989	0.0360414778383124	0.0674036128336479	0.268442190154599	0.124290664778094	0.0563898351856397	0.106999359444087	0.38398486107267	0.0710230012942932	0.2325695225023	0.163961638577594	0.0740097406163864	0.150913764440119	0.053227976673222
tox4b	0.00881658074322202	0.0396648593970456	0.00456497686249958	0.022561181773617	0	0.0365557815903177	0	0	0	0.00691847289511492	0.0262244470385952	0.0123725177824093	0.0200651930734074	0	0	0	0.00870926892654777	0
supt16h	0.153084996172708	0.28766051258636	0.554942778999803	0.457859735561248	0.300162588703689	0.35776746894698	0.823521804639496	0.860374867676571	0.225108825905617	0.221362167543873	0.335920843151452	0.405315392774277	0.329196703385825	0.233306596260863	0.0915454635169983	0.314481940607047	0.330714594719121	0.183097993466525
BX248243.1	0	0	0.00147679860779242	0	0	0	0	0	0	0	0.00119064599927466	0	0	0	0	0	0	0
si:ch73-126o18.1	0	0	0	0	0	0	0	0	0	0	0.00212698165563401	0.000935773556274521	0	0	0	0	0	0
si:cabz01007794.1	0	0	0	0	0	0	0	0	0	0	0	0.000750673936293156	0	0	0.00622732863170022	0.0480904059133988	0	0
si:cabz01007802.1	0.00746142206753967	0.00699604772002962	0.022953908695215	0.0175726081411465	0.369298922956904	0	0.366501740883269	0	0	0.00275945884622437	0	0.0157092857175742	0.0129776323892499	0.284184487705525	0	0.0799690238272057	0.00759988721767369	0
CABZ01007816.1	0.00253636498113586	0	0	0	0	0	0	0	0	0	0	0	0	0	0	0.0112952997998473	0	0
si:dkey-187j14.6	0.00046140686678056	0.00116396684556837	0	0.00541336451431293	0	0	0	0	0	0.000220940804832559	0.010292079779481	0.00204821907848028	0.00250271857805541	0	0	0.00348567110322885	0	0
si:dkey-187j14.4	0	0.00357864977543973	0.00144931106998288	0	0	0	0	0	0	0	0.00491431938873464	0.00162313730777423	0	0	0	0	0	0
zgc:172065	0	0.0139126563434757	0.00157193504890133	0	0	0	0	0	0	0	0.00184856688004058	0	0	0	0	0	0	0
zgc:172075	0	0.0171054207078223	0.068687806809392	0	0.0179018976011457	0	0	0	0	0.00672650417390346	0.00128787511938602	0.115553568851767	0	0.279893644049091	0	0.0164511565163031	0	0
si:dkey-187j14.7	0.0164783252553742	0.0050673963717442	0.864623282226749	0	2.30905437497	0	0	0	0	0.00963152382903098	0.00447429365791283	1.02167361604072	0	2.14376161906752	0	0.157226651771658	0	0.0553724053278406
zgc:66473	0	0.0657568696292489	0.0105534741085149	0	0	0	0	0	0	0	0.053802435990043	0.0067851821995329	0.00151397359781443	0	0	0	0	0
si:dkey-187j14.8	0.000792117919743088	0	0.0116129511568685	0.0216315386807025	0	0	0	0	0	0	0	0.00525935433390674	0	0	0	0	0	0
zgc:66473.1	0	0.0161869233245426	0.0204681076792821	0	0	0	0	0	0	0	0.00292839145799925	0.0100336554437675	0.00151397359781443	0	0	0	0	0.039579977281093
si:dkey-125e8.3	0.00956597155505561	0.00195747962753078	0	0	0	0	0	0	0	0.0247436553945103	0.0136730418933202	0.00138387759949463	0	0	0	0	0	0
si:dkey-125e8.5	0	0	0	0	0	0	0	0	0	0.00868222780210601	0	0.00177571469103299	0	0	0	0	0	0.0229419362535359
BX322792.1	0	0.000941957519599781	0	0	0	0	0	0	0	0.00150346801324802	0	0.000677122590573526	0.0191331716580328	0	0.00631014355576589	0.00269111490737721	0	0
si:ch211-217i17.1	0	0	0.0168151113068466	0	0	0	0	0	0	0	0	0.00177929948929306	0	0	0	0	0	0
BX004857.1	0.000565005453606268	0.0050050801563587	0	0	0	0	0	0	0	0.00037445624610946	0	0.00102603302287284	0.00929743902042183	0	0	0	0	0
zgc:171695	0.00236366597149163	0.0290813782820535	0.0183115479705604	0	0	0.00876916061594584	0	0	0	0	0.00347090617029932	0	0	0.0366116637438355	0	0	0	0
si:ch73-122k23.1	0.00598339625193102	0.0157081197356302	0.389813631530029	0.0125688695415935	0.0190383718384404	0.0111474642305742	0	0	0	0.00561093912309414	0.0101544878471528	0.5397008775771	0.00380235365691363	0.168641908975933	0	0	0	0.0421496311907271
si:dkey-201l21.4	0.00354515127719232	0.0171997314854458	0	0	0	0	0	0	0	0	0	0	0.0185253669786782	0	0	0	0	0
si:dkey-201l21.2	0.0189895980281093	0	0	0	0	0	0	0	0	0.00552057377941928	0.00522748818546055	0	0	0	0	0.0127302261397371	0	0
si:ch211-285c6.5	0.00400620901649975	0.0292090968834526	0.0213516023405198	0	0	0	0	0	0	0	0.00113522013741811	0.00880422290436598	0	0	0	0	0	0
si:ch211-285c6.4	0.00533538761350624	0	0	0	0	0	0	0	0	0.00175968644608335	0	0.000440308732154342	0	0	0	0	0	0
si:ch211-285c6.1	0	0.0356484137104243	0.00515087060848484	0	0	0	0	0	0	0.0010511621648895	0.0319732772169031	0.00172411457825346	0.00917595349626768	0	0	0	0	0
si:ch211-285c6.2	0	0	0.00208581110310623	0	0	0	0	0	0	0	0	0	0	0	0	0	0	0
si:ch211-285c6.6	0.0045608591949492	0.022696894144246	0.00178638329306264	0.0107734879544325	0	0	0	0	0	0.00420260910590668	0.0144405444196325	0	0.00327149659518992	0	0	0.00212456936775607	0	0
si:ch211-285c6.3	0.00501483327840201	0.002747075571596	0.00103790286329377	0.0029325943195648	0	0	0	0	0	0.00143291669832007	0.0114358229553653	0.00637914098263698	0	0	0.0369344413665743	0	0	0
BX005456.1	0	0	0	0	0	0	0	0	0	0	0	0.000305316923240761	0	0	0	0	0	0
si:dkey-192d15.1	0	0	0.000654229844552372	0	0	0	0	0	0	0.000704459907495961	0.0336459445590436	0.000463636437818194	0	0	0	0	0	0
si:dkey-192d15.2	0	0	0	0	0	0	0	0.0427745269137323	0	0.0014429781221429	0.00626371385995829	0	0	0	0	0	0	0
si:ch211-282j17.8	0.00612145056129125	0.240410537121473	0.00725174727040802	0.0040526602675161	0	0	0	0	0	0.0293147421622548	0.445805532632336	0.0125296972149401	0.00219946267126941	0	0	0.0276283531169765	0	0.0319017935188316
si:dkey-192d15.3	0.000104326761515898	0.0358365838254321	0	0	0	0	0	0	0	0	0.0307383553925286	0	0	0	0	0	0	0
si:ch211-282j17.1	0.00278029096992405	0.134526735942546	0.00130845968910474	0	0	0	0	0	0	0.00568091756817025	0.326240904741891	0.0079103660600998	0.0106820961340525	0	0.0402454975349633	0	0	0
si:ch211-282j17.2	0.00476676614873119	0.233357654003544	0.00152638072386361	0.00338642915607138	0	0	0	0	0	0.0266664853502099	0.631810349944376	0.0136631380572003	0.0080335452893572	0	0	0.0322738521184938	0.0414683443691767	0
si:ch211-282j17.3	0	0.0404771314367342	0	0	0	0	0	0	0	0.00195844169073967	0.196112413426823	0	0	0	0	0	0	0
si:ch211-282j17.5	0	0.0084459667156496	0	0	0	0	0	0	0	0	0.00369447299451075	0	0	0	0	0	0	0
si:ch211-282j17.13	0.000141122810050942	0.00715729955087945	0	0	0	0	0	0	0	0	0	0	0	0	0	0.00239610259536249	0	0
CR392330.1	0	0.0180742731993227	0	0	0	0	0	0	0	0	0.00470002379311516	0	0	0	0	0	0	0
si:ch211-282j17.10	0	0.0251743033809166	0	0	0	0	0	0	0	0	0.00686295570827575	0	0	0	0	0.0101483691570765	0	0
si:ch211-282j17.11	0	0	0	0	0	0	0	0	0	0	0.00282835825116953	0	0	0	0	0	0	0
si:ch73-335d12.2	0	0.00943725640081916	0	0	0	0	0	0	0	0	0.00483605296832095	0.00171952574792062	0	0	0	0	0	0
zgc:195077	0	0	0	0	0	0	0	0	0	0	0.0072048704924529	0	0	0	0	0	0	0
si:dkey-88n24.10	0	0	0	0	0	0	0	0	0	0	0.00498234811389677	0	0	0	0	0	0	0
si:dkey-88n24.8	0	0	0	0	0	0	0	0	0	0	0.00221604585619369	0	0	0	0	0	0	0
si:dkey-88n24.7	0	0.00920783800605968	0	0	0	0	0	0	0	0.000489535876909533	0.0445076830163805	0	0	0	0	0	0	0
si:dkey-88n24.5	0.00201632497351557	0.00491434815690299	0	0	0	0	0	0	0	0	0	0	0	0	0	0	0	0
si:dkey-88n24.3	0	0.0112018460642314	0	0	0	0	0	0	0	0.00191437974861897	0.047096285291413	0	0	0	0.00631014355576589	0	0	0
si:dkey-88n24.11	0.00147352683786003	0	0.00233255845741378	0	0	0	0	0	0	0	0	0	0	0	0	0	0	0
si:dkey-88n24.10.1	0	0.00442162883963194	0	0	0	0	0	0	0	0	0	0.000669592921652874	0	0	0	0	0	0
si:dkey-88n24.12	0.00128998568631882	0.00646847266423452	0	0	0	0	0	0	0	0.000164314364138245	0.00233151655689585	0.000737048944472207	0	0.0176431254443862	0	0	0	0
ndrg2	0.110790359229712	0.243286561740733	0.158029080334449	0.0319707775303612	0.00798294842217024	1.00131384670476	0.87742556269537	0.218837535014006	0	0.15478339976008	0.321939521726608	0.17485636747367	0.032769901171898	0	0.924072235164361	0.280851094101391	0	0.0464990839680458
zgc:55733	0.0143103190865877	0.0455079683259959	0.102503334333061	0.186079082184032	0.177763546157457	0.0246991576370853	0	0.334823653058802	0.148702238832643	0.00922732123215872	0.050389395235861	0.0636244360278229	0.111470155506898	0.145193855200656	0.0708645540749632	0.115609995216506	0.213882296826724	0.245112414192193
si:ch211-63p21.1	0.00339249957143931	0.00420498194527202	0.00190925173751454	0.00388848902260106	0	0.0101595558242194	0	0	0	0.00288877509378864	0.0130620293281779	0.00123446528508037	0.003664695060724	0	0	0.0996569211710917	0.0152307148688331	0.034662525650269
si:dkey-28d5.5	0.002793787530485	0.0748592699314027	0.129095609170068	0.0265876095377232	0	0	0	0	0	0.0080948735796073	0.24470648260393	0.088431784413301	0	0	0	0.0304451074712294	0.0170280008445888	0.0689840733864159
si:dkey-28d5.14	0.00170843067828969	0.0171399723461221	0	0	0	0	0	0	0	0	0.0309377964180799	0.000501771982668194	0	0	0	0	0	0
si:ch211-63p21.4	0.000358759967697253	0.223155220269319	0.252760607552518	0	0	0.00796841321003542	0	0	0	0.00750840496790375	0.224108698126548	0.110585359613535	0	0.0415594778467203	0.00606943432872056	0.0294959582060477	0.0130571485276759	0
klhl33	0	0.052021701978845	0.00603595126607283	0.0321187191636115	0.0193107976324962	0	0	0	0	0	0.0104051328005819	0.00196926483065889	0	0	0	0	0	0
cbln11	0.0148297793913472	0.0233602432688891	0.00181578743957515	0	0	0	0	0	0	0.00167396739962368	0	0	0	0	0	0.295468394638277	0	0
si:ch211-63p21.8	0	0	0.00305013849355519	0.00624269994275444	0	0	0	0	0	0.000830862348708275	0	0.00668754572744659	0	0	0	0.0223833246826058	0	0
slc12a10.2	0.00828641980034659	0.0147326607199274	0	0	0	0.010769015388923	0	0	0	0.00238320069214707	0.00281749189125834	0	0	0	0	0	0	0
slc12a10.3	0	0	0	0	0	0	0.0674036128336479	0	0	0	0	0	0	0	0	0.00240317141725592	0	0
slc12a10.1	0.00653498428262955	0	0	0	0	0	0	0	0	0.00218815939479557	0	0.000676461788263266	0	0	0.0257698750161062	0.171119850620983	0	0
si:dkey-83f18.14	0.000681422507644368	0	0	0	0	0	0	0	0	0	0	0	0	0	0	0	0	0
si:dkey-83f18.10	0	0.0684509506015622	0.0347996636812981	0	0	0.121700958327107	0	0	0	0.00145869046938325	0.01610462489252	0.098251633844825	0	0	0.145938634461661	0	0	0.0386421160422745
si:dkey-83f18.4	0	0.0842610443691567	0	0	0	0	0	0	0	0.00860092960353429	0.196007289618759	0.00275742793208986	0	0.0183082114159021	0	0.0271391729056314	0	0
si:dkey-83f18.9	0	0.0136243494373144	0	0.00197832507481531	0	0	0	0	0	0	0.00703469697673601	0	0	0	0	0	0	0
CR318646.1	0	0	0	0	0	0	0	0	0	0.000801756126502871	0.0475237297734526	0	0	0	0	0	0	0
si:dkey-83f18.7	0	0.013452794145344	0.00481486367676472	0	0	0	0	0	0	0	0	0	0	0	0	0	0	0
si:dkey-83f18.15	0	0.0336201183969934	0.00441971759772438	0	0	0	0	0	0	0.00872492448235943	0.120862886862973	0.00092964441751781	0.00373846450047572	0	0	0.0184056306505286	0	0
zgc:162060	0.000115218569915176	0.0631445818196507	0	0	0	0	0	0	0	0.00594080227704481	0.260741369249394	0.00158136450343722	0	0	0	0	0	0.0535940146204472
si:dkey-83f18.6	0	0	0	0	0	0	0	0	0	0	0.0639619962869125	0	0	0	0	0	0	0
si:ch211-225k7.3	0	0.0205684555680436	0.0120764740930533	0.00271813953134382	0	0	0	0	0	0.00168935411975822	0.1484448714848	0.00438371524924238	0	0	0	0	0	0.0341101348032527
si:dkey-83f18.5	0	0.0496952436657073	0	0	0	0	0	0	0	0	0.0405649807928371	0	0	0	0	0	0	0
si:dkey-83f18.3	0	0	0.00375228326436637	0	0	0	0	0	0	0.00282681446965688	0.0243930543184208	0	0.00566613971567311	0	0	0	0	0
si:dkey-83f18.2	0	0.0597298792029931	0.0176788703908975	0	0	0	0	0	0	0.00801013559107404	0.244683567194511	0.00463405772923757	0.00388787372186151	0.0569602778855329	0.0206878717351952	0.0202967383141529	0.00450254528885179	0.0229419362535359
si:ch211-225k7.6	0.0011346470958197	0.00862438668933291	0	0	0	0	0	0	0	0	0.0712631754564169	0.0046283011357851	0	0	0	0	0	0
si:ch211-225k7.2	0	0.0032273160026464	0	0	0	0	0	0	0	0.00160099184646872	0.0526726388090809	0.000501771982668194	0	0	0	0.00182874464726442	0	0
si:ch211-225k7.4	0	0	0	0	0	0	0	0	0	0	0.00841843163661718	0	0	0	0	0	0	0
si:ch211-282j17.10.1	0	0.0137448542701826	0.0159490396285788	0	0	0	0	0	0	0.000202231732326726	0.0705617684463833	0	0	0	0	0	0	0
si:ch211-225k7.5	0	0.00475032888533854	0	0	0	0.0510946256984716	0	0	0	0	0.0414779520818596	0.00278719462450496	0	0	0.0738914304896623	0	0	0
si:dkey-28d5.1	0	0	0	0	0	0	0	0	0	0	0.0046969897136971	0	0	0	0	0	0	0
si:dkey-28d5.3	0	0	0	0	0	0	0	0	0	0	0.00388164100255024	0	0	0	0	0	0	0
si:dkey-28d5.4	0	0.0361768044617165	0	0	0	0	0	0	0	0	0.00128787511938602	0	0	0	0	0	0	0
si:dkey-83f18.8	0	0	0	0	0	0	0	0	0	0	0.0210088854046515	0	0.00565331072009045	0	0	0	0	0
si:dkey-28d5.8	0	0.00795563935495676	0	0	0	0	0	0	0	0	0.0111759088661269	0	0	0	0	0	0	0
CR318599.1	0	0.00486731694020988	0	0	0	0	0	0	0	0	0	0	0	0	0	0	0	0
si:dkey-28d5.10	0	0	0.00547467034272531	0	0	0	0	0	0	0.000719956088438254	0.00381670648763769	0	0	0	0	0	0	0
si:dkey-28d5.11	0	0.0186615907139925	0	0	0	0	0	0	0	0.000202231732326726	0.00998436822081092	0	0	0	0.0422609614368727	0	0	0
si:dkey-28d5.11.1	0	0.0184928745359373	0	0	0	0	0	0	0	0	0.0267777761716206	0.00401377044363803	0	0	0	0	0	0
si:dkey-28d5.13	0.00689599643610718	0.521714611225751	0.0197102930589982	0.00521514385823657	0	0.487465541826451	0	0	0	0.0149856983006052	0.393107694223496	0.0465995670016051	0.0223752524187769	0	0.285424012018687	0	0.00921036755813814	0
si:dkey-28d5.14.1	0	0.00357864977543973	0	0	0	0	0	0	0	0.00216392511780408	0.0289155993514483	0	0	0	0	0	0	0
si:dkey-81n2.2	0	0.0504455499630841	0	0	0	0.00646684127138099	0	0	0	0.0013446238710538	0.0725138233168627	0.0079103660600998	0	0	0	0	0	0
si:dkey-81n2.1	0	0	0	0	0	0	0	0	0	0	0.0175529259983766	0	0	0	0	0	0	0
CR847899.1	0	0.0187799732836855	0.0311241352464496	0	0	0.0113380613048975	0	0	0	0	0.0142618370606753	0.00677395444032629	0	0	0.0740740740740741	0	0	0
si:ch211-272h9.3	0	0.0241994547874212	0.00811210277060758	0	0	0	0	0	0	0.00239516368548627	0.141519160944717	0	0	0	0.00606170818936776	0	0	0
ltb4r	0.0239201550553276	0.00691342060731166	0.13367429831271	0.0160623638974397	2.31541679270572	0.00815078960774325	0	0	1.69354655004225	0.00632364824956769	0.00738795596616142	0.20111899521742	0.0159296888362949	1.78909776781866	0.0318226509584774	0.0322878066233416	0.00896115161551641	3.6009100831816
CR847899.2	0	0	0	0.00338642915607138	0	0	0	0	0	0	0	0	0	0	0	0.00521243812835942	0	0
ltb4r2a	0.0281856623013749	0.00617244087720443	0.00373166632335336	0.00610358044647222	0	0	0	0	0	0.0167512137424457	0.00853205890941058	0.00525168620622168	0.0260197205091249	0	0	0.0105443568130405	0	0.25820892968045
si:ch211-272h9.5	0.014779780627945	0.0102322998211579	0.00679427702962802	0.00202478785791416	0.0239071446501787	0	0	0.083903879715398	0	0.0150784891835057	0.0150890266841545	0.0165897773364164	0.00810102879922256	0.0856300431140285	0	0.00674359762841159	0.0665925151473913	0
zgc:195075	0.0118544384855017	0.00132669455378619	0.00238912043410795	0	0	0	0	0	0	0.00138296943463102	0	0.000454696413754821	0	0	0	0	0	0
si:ch73-223f5.1	0.00632221454334048	0.0491740466568983	0.05383551098242	0.119899208234709	0.176956696543342	0.091603260242227	0	0	0.0757363466301113	0.00733023301562511	0.0221040265407151	0.0554365246583776	0.110983895916705	0.167968647718171	0.00796923873846951	0.0654380446302071	0.083589792203722	0.0194196627969752
si:ch73-223f5.2	0.00292273454597392	0	0	0	0	0	0	0	0	0.005970249226306	0	0	0	0	0	0	0	0
FP236789.1	0	0	0	0	0	0	0	0	0	0.00161671868189573	0.000597158172031954	0	0	0	0	0	0	0
si:cabz01074946.1	0.0869755207222389	0.0546642888735901	8.31665361097023	3.3759971555532	1.37745186229543	0.0901002830841775	0	1.85870965519048	1.2929159118365	0.126304100947277	0.152597984281245	9.91231592535412	2.89460021923738	1.6767977347097	0.0246822164630384	0.3588908819787	3.20772432914722	1.38497801323829
vangl2	0.0823562987326744	0.425751627673319	0.0875412485663409	0.0520191299817252	0.0709650920055193	0.166371241367871	0.0674036128336479	0.10264390236775	0	0.0886791983201364	0.402577080058409	0.080915913486911	0.042322284190302	0.0727350467709028	0.14335074626364	0.288338060661769	0.146767068182203	0.0287879018054242
arhgef11	0.236478193084327	0.201301175527041	0.0490533616451214	0.0597604284680307	0.0768229772783194	0.188871508558825	0.0674036128336479	0	0	0.172457044615037	0.17863562750921	0.0390039335994746	0.0383954892871781	0.131289665207848	0.105403218139027	0.10590579512176	0.0772751854712761	0.0467211123362425
MYADM	0.0156527366079064	0.0565050385628123	0.262936435778714	0.406661832998403	0.554616345084902	0.114993192802566	0.188058298072402	0.338090723130597	1.15263148069486	0.0157433956817168	0.0622229797319168	0.432653792556024	0.49006387754691	0.735196276762734	0.113220541312174	0.335607213459553	0.54472000462742	1.62600317224048
si:dkeyp-67a8.4	0.000135668330005615	0	0	0	0	0	0.310655483069276	0	0	0.00064118083966991	0	0.00477606193479136	0	0	0	0.0216955539114502	0	0
si:dkeyp-67a8.4.1	0	0	0	0	0	0	0.310655483069276	0	0	0	0	0.00202323237268911	0	0	0	0	0	0
BX005156.2	0	0	0	0	0	0	0	0	0	0.000997293743697104	0	0	0	0	0	0	0	0
BX005156.3	0	0	0	0.00466950198827395	0.0257052888631836	0	0	0	0	0	0	0	0	0	0	0	0	0
si:ch211-165f21.4	0	0	0	0	0	0	0	0	0	0.00128723322091497	0	0	0	0	0	0	0	0
si:ch211-165f21.2	0	0	0.00860793649841029	0.00307191915691793	0	0	0	0	0	0	0	0.000668601599696187	0	0	0	0	0.067280726283224	0
BX000524.2	0.00378678641773409	0	0	0	0	0	0	0	0	0	0	0	0.00515174463832177	0	0	0	0.0132073876843751	0
si:dkey-10h3.2	0.00150150758869443	0.00284615669231054	0.0090111520861467	0.0187978291022104	0	0	0	0.397007576519716	0	0.00167989753968926	0.00216817359120857	0.0153635124110214	0.0502400382053403	0	0	0.03497379917575	1.4887453234557	0
dusp19b	0.0139793849529118	0.0258765862422153	0.0138753194847798	0.011538814006773	0	0.0369289855607666	0	0	0	0.00587093975625501	0.0373344046099818	0.001721348156183	0	0.0201986333604668	0.148111760082489	0.0159829766859577	0	0
hist1h2a11	0.00449883301957843	0.0236336304091462	0.0240393038339257	0	0	0	0	0	0	0.00113139497622348	0.00397067685945951	0.0142612001772484	0	0	0	0	0	0
CU459186.4	0.0163767811746354	0.00521761221906512	0.0367589230870755	0.00372961624859533	0	0	0	0	0	0.0173823602070517	0.0153833873399435	0.015521211817917	0	0	0	0	0	0
ano9a	0.159938588290478	0.0548497703892821	0.0327271660035573	0.0396868767715648	0.0128510753137269	0	0.188058298072402	0	0	0.136113665826525	0.051520927610899	0.0449298272613999	0.0194980967750887	0.0352288820466571	0.00718971870225578	0.0103252582069075	0	0
CU459186.5	0.0170094724616816	0.0359493338233071	0.0733394663866046	0	0	0.0441452378324688	0	0	0	0.0222241731845174	0.0212090481898739	0.0422956677215553	0.00265280487691649	0	0	0.00120158570862796	0	0
hist1h4l	0.0397849858146068	0.0707006091560898	0.019983209468933	0.010681450317295	0	0	0	0	0	0.0719856543906436	0.0386959269236314	0.0102285120704137	0.0143897578508569	0	0.0305614131597445	0.0376137721042101	0	0
si:ch211-113a14.22	0.0206623373804461	0.0399070405122174	0.0149450481699892	0.00354501692922835	0	0	0	0	0	0.0309895502681435	0.0210592456847912	0.00437556613287752	0.0107895917251796	0	0	0.0114092734574662	0	0
HIST1H1D	0.0325754837010987	0.0145422286722619	0.0300337389262982	0.00620204774330564	0	0	0	0	0	0.0418109681072792	0.0162370151635981	0.0302674865103984	0.00355680755181379	0	0	0.0103395080875632	0.00719086644907105	0
CU459186.1	0.00392152606642029	0.00210880601767644	0.00429467923287821	0	0	0	0	0	0	0.00204217416135109	0.00141981240044214	0	0	0	0	0	0	0
si:dkey-23a13.11	0	0	0.00401790518885878	0	0	0	0	0	0	0.000897533291304841	0.00110195776019592	0	0	0	0	0	0	0
zgc:171759	0.0200489994038267	0.0259715988559463	0.0131212808451635	0	0	0.0507408159123199	0	0	0	0.0200293286821481	0.0131730581862955	0.00744076927785614	0.00728174532269905	0	0	0	0	0
CU459186.2	0.0156549328641288	0.0581634136132503	0.103140869185676	0.0078177892230212	0.0234857558890533	0	0	0	0	0.0213717282944482	0.0291655398450453	0.0706554340082625	0.015463142056718	0	0	0.00833770786782693	0	0
hist1h4l.1	0.0138349766476721	0.0112205290922332	0.0253330677763275	0	0	0	0	0	0	0.0202752470104339	0.00812978785382847	0.0367125093107929	0	0	0	0	0	0
ano9a.1	0.0484336180671654	0.0332440447469722	0.0176854316752463	0.00526044461277867	0	0.00898319244693179	0	0	0	0.0912259139987292	0.029736695691018	0.0182545907508954	0.00679027133008607	0.0304266732388281	0.00715729955087945	0.0146995047607268	0	0
si:dkey-23a13.17	0.0175410702444362	0.0303558817363988	0.151449659547545	0.00354501692922835	0.0690751116310108	0	0	0	0	0.0478784886659112	0.0436826792563423	0.120499737431113	0.0181015200667514	0.0319521484624626	0.0455840455840456	0.0143290288930539	0.00719086644907105	0
CU459186.3	0.0256836513939406	0.0269191571727652	0.0580714915316082	0.00483562033997312	0	0	0	0	0	0.0302406621277722	0.0259403866407882	0.0343281277496532	0	0	0	0	0	0
zgc:163040	0.0316002363758195	0.0294005197593925	0.0191483664851265	0	0	0	0.310655483069276	0	0	0.0372590811574311	0.0249092611202387	0.0153482503025797	0.0185240297217601	0	0	0.00329023130326062	0.0295956932347205	0.0598216208706285
hist1h2a11.1	0.0334028777454773	0.0384944569691498	0.124291525307914	0.00525154369126805	0	0	0	0	0	0.0574582016642352	0.023860294655231	0.0774575675737985	0.0132379228989098	0	0	0	0	0
si:dkey-23a13.21	0.0219781059719689	0.0514335510202888	0.0870690429294368	0.00593286213477386	0	0	0	0	0	0.0475596758098662	0.0306053478669396	0.0654544503275116	0.0198988050765234	0	0.0153895279804023	0.0173477388957123	0	0
si:dkey-23a13.22	0.181330338101538	0.0996727123007019	0.0744485209029829	0.0398935508343235	0.0443411543209993	0.0265572976021644	0	0.110031709185792	0.0757363466301113	0.291742429093473	0.195754230273803	0.068093613452267	0.105917109548592	0	0.0320001166734917	0.189881411581541	0.055174509450034	0
si:dkey-273g18.1	0.147804402052894	0.363158810326642	0.0140525409293835	0.0269746938135924	0.0681033933081936	0.310900123277378	0	0	0	0.159840975087827	0.577211630143264	0.0778437421597066	0.121760472091236	0.0482053413383054	0.225311332888663	0.04904351679191	0.0690520206904528	0.14126295659269
si:cabz01036006.1	0.000477585298167009	0	0.0677669191369359	0.168285694551919	0.0698616785559158	0	0	0.083903879715398	0.0962667744854541	0.00181086723156066	0	0.0441658370967761	0.0202696160566367	0.0525933795453828	0	0.00306760510842143	0.0597893841251707	0.0021316843759899
si:ch211-220f21.2	0	0	0	0.0114226999346306	0	0	0	0	0	0	0	0	0	0	0	0	0	0
si:ch211-220f21.1	0	0	0.00195573723483487	0.0118349002477005	0	0	0	0	0	0	0	0	0	0	0	0	0	0
si:ch211-220f21.3	0	0	0	0.00826174531022028	0	0	0	0	0	0	0	0.000836643443396846	0	0	0	0	0	0
hist1h4l.2	0.0379358309777135	0.0510832251883416	0.053279936236646	0	0	0.0819202097157369	0	0	0	0.0770692142703212	0.0410820737765771	0.015580923657348	0.00390205072275734	0	0	0.0512665307063622	0	0.0208280829207637
CU457819.5	0.00822383889939495	0.00668899913802111	0.0199994978981899	0	0	0	0	0	0	0.0121520326300998	0.0140883021695127	0.0251402978853788	0.00675846920672468	0	0	0	0	0
si:ch73-368j24.11	0.0468434914021658	0.0389977390278742	0.0725703311060864	0.0147583250259651	0	0	0	0	0	0.0575936525596418	0.0363940810866281	0.0978021647443606	0.022276576877292	0.0219967312857309	0.0265373323806292	0	0.0137615941430655	0
ano9a.2	0.0701946964821808	0.0423420421051253	0.0405014586035292	0.025010385810779	0.00399147421108512	0	0	0	0	0.113214667437226	0.0542081394436934	0.0291681074041727	0.0239302637886014	0.0463001546425165	0.0685614479764247	0.00290816029779561	0	0.035151732453134
hist1h4l.3	0.056367244455556	0.0392260924441616	0.0597282903997714	0.00688327683514895	0	0.0139063684214186	0	0	0	0.0542422031059611	0.0146739718810349	0.0244927458110385	0.0166729595226083	0.124154447245866	0.0148741941407512	0.0270379352091321	0	0.0403970219315432
CU457819.1	0.0188264968926403	0.0436009977233132	0.162397103769654	0	0	0	0	0.0885959316748175	0	0.0246418259206212	0.0531971024786828	0.131248398969993	0.00653253200940685	0	0	0	0	0.0210262933798715
ano9a.3	0.0326683253486709	0.0259920830299837	0.0451131197573741	0.0162522478170418	0	0	0	0	0	0.0353000364617336	0.0134404039354079	0.0204562270658623	0.0141863553521501	0.0463001546425165	0.0061122826319489	0.0520324349663245	0	0
hist1h4l.4	0.0304961287147272	0.0165511425748543	0.0247881102327791	0.00588372004083302	0	0	0	0	0	0.0327669317113277	0.0123943019156582	0.0228987148557483	0.0118539158612703	0	0	0.00487280991558344	0	0
CU457819.3	0.179601450769757	0.382337725994268	0.896290216594766	0.0512844010875522	0.210918790544311	0.0179663848938636	0.564174894217207	0.0692712662787476	0.0695778018980824	0.019636841607263	0.0100751547149416	0.0342601942996134	0	0	0	0.0206790161751265	0	0
ano9a.4	0.154829762305755	0.0633874621550245	0.0211080334182943	0.0129004780788707	0.0423247146616094	0.0674172453313558	0.0674036128336479	0	0	0.21886805285129	0.113286410235583	0.0365844249609678	0.0212504245870859	0	0.0134399404854547	0.0593296615215505	0	0
CU457819.2	0.00642949579585162	0.0139106283548678	0.0148629446210706	0	0	0	0	0	0	0.00542057472900589	0.000595729301305758	0.0080619820896555	0	0	0	0	0	0
hist1h2a11.2	0.0127944474496205	0.0308326340589232	0.113448037305323	0.00530540567784516	0	0	0.188058298072402	0	0	0.01507025188851	0.0391717979267194	0.0954225912131509	0.00795617881028868	0	0	0	0	0.0210262933798715
si:ch73-368j24.17	0	0	0	0	0	0	0	0	0	0	0	0.00256199581523604	0.00515174463832177	0	0	0	0.0227500227500228	0
CU457819.6	0.0031496726108616	0.00104588944530207	0.0023450870660475	0	0	0	0	0	0	0	0.00388752004988466	0	0	0	0	0	0	0
CU457819.4	0.029155647106045	0.0192000314304949	0.0252206350852229	0	0	0	0	0	0	0.0310867340791799	0.022583990757785	0.0135570117826924	0.00485564177017276	0.0219967312857309	0.0637348629700446	0.0103395080875632	0	0.0324304690743047
si:ch73-368j24.12	0.0107656142918136	0.00489156258231379	0.0474686287514643	0.00575284953019354	0	0	0	0	0	0.0316983636955361	0.0249861079478327	0.0419451834966375	0	0	0	0.0109214431153941	0	0.0587168029875109
hist1h4l.5	0.00944837013461344	0.00228883777324082	0.0107328429464257	0	0	0	0	0	0	0.00987063297812638	0.00341786834374732	0.00551293394329062	0	0	0.0257698750161062	0	0	0
hist1h2a6	0.0326861944026437	0.106849083119972	0.480116727219505	0.00695508790979729	0.0249371814641904	0	0.188058298072402	0	0	0.0614819410684907	0.142078782924712	0.503585112410994	0.0469917308694343	0.00580972117405169	0.0246822164630384	0.00159311874661064	0.0460117533966547	0.107001851456856
ano9a.5	0.0356618135105236	0.016343469598004	0.0142002097046367	0	0	0	0	0	0	0.0572587229924566	0.0360423231233703	0.0315877968872988	0.00954562485249189	0	0	0.0107442314221494	0	0.0021316843759899
zgc:173552	0.0106542233880086	0.0160066958978964	0.0378058227536947	0	0	0.0321355072945736	0.376116596144805	0	0	0.0211934818237613	0.0190458634398077	0.0927638187007701	0.0132914060733911	0	0	0.0103705756078971	0	0
si:ch1073-153i20.5	0.00356882104027581	0.0193681446090918	0.0833052058978822	0	0	0	0	0	0	0.00569300332060844	0.0184130564896705	0.0584583589493232	0.0128215005718407	0	0	0	0	0
si:ch1073-153i20.4	0.0283060864360534	0.0416703984386698	0.106817893763421	0.00402115610650756	0	0	0	0	0	0.0640079874163452	0.0679469955922574	0.105963376270326	0.0222746282528064	0	0.0125787207904991	0.0125405687398735	0	0
hist1h4l.6	0.0241781261059897	0.0131916046793941	0.00245041360426714	0	0.0142594361818934	0	0	0	0	0.0239199673601955	0.016780157285621	0.00314136923145745	0	0	0	0.000578518497434733	0	0
hist1h2a10	0.130230281667009	0.139585262368412	0.0491422944500641	0.00589071248235543	0	0	0	0	0	0.176575848874949	0.157404110459074	0.0651524857325809	0.0195476245222208	0	0.0255873420090172	0	0	0.0208280829207637
ano9a.6	0.0404676565051265	0.0287131132226671	0.0657288742200542	0	0.0229331498681344	0	0	0	0	0.0730876640709333	0.0417578393109387	0.0227915096471878	0.0144783474594381	0.0352288820466571	0	0.0152809736585058	0.0137316613662454	0
FP325123.2	0.00670472485317763	0.0106961642143008	0.026929376409331	0	0	0	0	0	0	0.0110408932397218	0.0022478166522802	0.0112685337640902	0	0	0	0.00742211969800879	0	0
hist1h2a11.3	0.0217108856690464	0.0175368711583071	0.0609029607464017	0	0	0	0	0	0	0.00724936559459438	0.0214217487110189	0.0414532545260355	0	0.0314035831488373	0	0	0	0
si:ch1073-159d7.7	0.0694212197478853	0.0439166700885998	0.0729198043987794	0.00926429639152457	0.0191841002177395	0	0	0	0	0.0895077897520488	0.0703248309614921	0.0877211972237621	0.0209301517358468	0.0762852762717517	0	0.0221359714037793	0	0
zgc:154164	0.0486913913463859	0.0428855841905807	0.0188562756872804	0.0194162105123297	0.0458662997362688	0.0193760899050572	0	0	0	0.0489186629342871	0.10987259568509	0.0317413136503606	0.0289654697393943	0.0262086100525745	0.00768447543849538	0.0673837485534984	0	0.0227032869244
ano9a.7	0.0941556510575702	0.0118752053584807	0.0637704115224267	0.0191387424979973	0.0182431816108729	0	0.188058298072402	0	0	0.0737090019360449	0.0480622225925256	0.0322869240919878	0.00485564177017276	0	0.00768447543849538	0.0149534910213885	0	0.0206584680093294
hist1h4l.7	0.32885049790709	0.343218817180132	1.05082777403692	0.12719142173575	0.176982965575103	0.0581802354767246	0.188058298072402	0.069816800714924	0.512987983621631	0.360820405172065	0.480714949564877	0.984335939825891	0.179111115801888	0.116257630409013	0.0702366659627818	0.146343405635507	0.129873448497681	0.0540290075824273
hist1h2a2	0.0169649051322008	0.0384863662982096	0.154430512456725	0.00519441392726262	0	0	0.188058298072402	0	0	0.0224077586225786	0.0368394722671828	0.123972215716357	0.00390272839742264	0	0	0.00636511306986857	0.0151530304545606	0
ano9a.8	0.104956969168858	0.0853537456807731	0.0926088186254019	0.0192616951641013	0.0728959209083248	0.0495777965756667	0.188058298072402	0	0	0.0967578562198473	0.085216129289453	0.0429830007315593	0.0304877477141422	0.0238518324170254	0.0483617458590255	0.034765586602344	0	0
FP325123.1	0.0126560425708902	0.0109359059387733	0.0386082796612645	0	0.0190383718384404	0	0	0	0	0.0211120937647055	0.010731270099044	0.0527308425106308	0	0	0	0	0	0
hist1h2a11.4	0.0119751751485452	0.0250950968891122	0.161141373041556	0.0138662189725998	0.0142594361818934	0	0	0	0	0.0231686125084432	0.0440449006895744	0.0909591166916321	0.0285846473758737	0	0	0.0035841801778413	0.00470295656067143	0
zgc:110425	0.172112318110401	0.685561206811979	0.732067700622765	0.114335351840006	0.178510059834142	0.0130677103411326	1.12834978843441	0	1.60912017703644	0.259976837166946	0.848768169386971	1.25242026660472	0.226860632514416	0.309724158653395	0.24105371526979	0.146176895777629	0.0171621103841461	1.0478266481715
si:cabz01036022.1	0.000542346378083436	0	0.0668573509072425	0.0031637740280728	3.46205367657276	0	0	0.0661375661375661	3.33733418619184	0.00431350621238908	0.000971044754724712	0.175144364733922	0.0286377112114383	4.32380106439801	0	0.106793106062451	0.294840200598072	4.70775562343959
si:ch1073-220m6.1	0.00191722643287752	0	0.111215461599065	0.0889534492732971	0	0	0	0	0	0.00405542772231109	0	0.0344222423969317	0.151605823090954	0	0	0.00239610259536249	0	0
pnp5a	0.300512022899442	1.47709243714241	0.854189780077841	1.66740527991067	13.9072787512685	0.597138571775673	0.764009365803395	1.4390525352158	1.07883701476808	0.34039674822327	1.21331456854018	2.19508461033523	1.56775624309492	16.4677502382089	0.523461227705932	1.6017668222304	1.89787284103708	1.63303403730627
zgc:55262	0.0440346281867819	0.088800665107874	0.0997525516413766	0.187722666985107	0.0945200823096401	0.0516864628645043	0.25546191090605	0.22595518159269	0	0.0587576848990414	0.0864305799828518	0.0708935906922727	0.169136940746615	0.056145625207326	0.130373634448848	0.116483203036886	0.289768143568497	0.0194196627969752
sf3b2	0.395694552030226	0.645873036584653	0.675299969650643	0.571708893668665	0.360030404320919	0.559009880233451	1.04635976801559	0.155982836208979	0.0749788184837783	0.352967414295682	0.587339605787154	0.631727084805308	0.524407152604876	0.284123614886776	0.383764210557681	0.294872689342642	0.45472233796314	0.22904457090986
prkd4	0.0167071940611909	0.00372418673072268	0.078775800054587	1.00138451794797	0.0631059930535523	0	0	0.269986993584232	0.300494596624915	0.00131824541138008	0.000317802898896347	0.0548474734824112	1.11499589146609	0.0262086100525745	0.00622732863170022	0.0357607241259585	0.405616775666921	0.0685926976434229
ccs	0.00167901243421451	0	0	0	0	0	0	0	0	0.000364046802814803	0.00793431056695769	0	0	0	0.00718971870225578	0	0	0
rbm14b	0.135219935188524	0.399935867494125	0.387088572630687	0.628069323545706	0.344409682229402	0.556049444397398	0.310655483069276	0.677462550701441	1.02384112772134	0.115846467049865	0.505323963636432	0.389719158157901	0.535040400924562	0.613286504231345	0.682435514480066	0.188573417779074	0.96883596471126	0.590078602795677
actn3b	0.0033968913622692	0.00374376195663975	0.00195630322856547	0	0	0	0	0	0	0.00099916552855718	0	0	0	0	0	0	0	0
ccs.1	0.0129767575199091	0.0271807724034215	0.0162590090234701	0.0214232528488867	0	0.0467974686599325	0	0	0.229250762172956	0.0160875451591414	0.0249193937576194	0.0213903720333243	0.0261109835383081	0	0.0310800310800311	0.00442533283058881	0.0132073876843751	0
gal3st3	0.0832430597251906	0.132773023869857	0.00803357968698625	0.00427992965507619	0	0	0	0	0	0.0246426353242147	0.106699474404268	0.00045350647121989	0	0	0	0	0	0
si:ch211-168d1.3	0.00523584797142334	0.00476288062281724	0.000863953277406758	0.00434991215352406	0	0	0	0	0	0.001509375959986	0.00418565832348515	0.00103121032685513	0.016036306368434	0	0	0	0	0
zgc:101810	0.000279608881977454	0.0115085393361875	0.0434225552316808	0	0	0	0	0	0	0	0.00183896479522575	0.0554039028228527	0.00390205072275734	0	0	0.0156190770053203	0	0
six7	0.000408815417672199	0	0	0	0	0	0	0	0	0	0	0	0	0	0	0	0	0
b4gat1	0.00823793344135914	0.00946512574419551	0.00822798658630968	0.0107692301264661	0	0	0	0.0627321088025695	0.0570528766060385	0.00472669576379901	0.000847468121477674	0.00321160714416745	0.00564195584041164	0	0.00718971870225578	0	0	0
pfdn2	0.070673930451032	0.137637613378935	0.263795405693074	0.140256453155532	0.0276596202985565	0.215721918118453	0	0.413387828467691	0	0.0919806378446635	0.145362809646611	0.20677250424926	0.189344677007994	0.216239914122055	0.0951536172794919	0.158624831739349	0.256579563381635	0.053227976673222
nit1	0.0240749745527193	0.0049625449831569	0.0181154298113901	0.016716138356492	0.0274623422631716	0.0101595558242194	0	0	0	0.0284116302933568	0.0263737841700909	0.0458743634177236	0.0293100608607956	0.0361511987737514	0.0259134390555606	0.0274899584866464	0.0734787499840628	0.0021316843759899
clcn3	0.172949244983526	0.251993845542312	0.236541984156708	0.0984672585943952	0.126322883079012	0.173715881800633	0.0674036128336479	0.177815853070231	0.21736749384033	0.150640160541518	0.316524156878049	0.467269807711648	0.0874811090199897	0.177184307376063	0.204721051512436	0.258692065825162	0.169567563377603	0.184897024295352
si:ch211-42c5.5	0	0	0	0.00338642915607138	0	0	0	0	0	0	0	0	0	0	0	0	0	0
mfap3l	0.071617088032918	0.119020436608139	0.485084669738897	0.524303825601854	0.620773116154637	0.421550033779008	0.322865523739698	0.845048411886465	0.20420668717472	0.0880078114785613	0.193779267465679	0.62965494340173	0.315464177235582	0.879046877854291	0.41947126674254	0.214042490116318	0.552758264419286	0.077628487797653
aadat	0.000104326761515898	0	0	0	0	0	0	0	0	0.00186562615912986	0.00346037763793238	0	0	0	0	0.0019846373194377	0	0
ino80b	0.0409714377563799	0.0826987321820234	0.0572821465384761	0.0579844318045775	0.0435883685369039	0.0223670593036789	0.366501740883269	0.211191869368414	0	0.0171553136702542	0.0421707029251051	0.0353175570678726	0.023927620392624	0.108697913865419	0.0699446423773672	0.036231751111234	0.0823272314533216	0.0187012015521997
intu	0.0035632864762437	0	0.00630453625078317	0	0	0.011215728938263	0	0	0	0.000218917214441321	0.00267404587029806	0.00327460073899282	0	0	0	0.00847245012375973	0	0
RF01848	0	0	0	0	0	0	0	0	0	0.0020169358065807	0	0	0	0	0	0	0	0
RF01848.1	0.00140489197434386	0	0	0	0	0	0	0	0	0	0	0	0	0	0	0	0	0
trmt10b	0.0134954272414834	0.030211588998583	0.0483088210428675	0.0650914923439046	0.103077668982247	0.00922394351256993	0	0	0.060084960133629	0.00814086287837359	0.0369804818092895	0.0403969694299742	0.0833542567451333	0.291868172869579	0.00693397125868913	0.066041641397248	0.0255865828291286	0.0194196627969752
cxcl19	0.268556583595465	0.260532512941633	30.9934753901103	2.16522213930794	26.0790278331337	0.119593943043204	0	0.775262058043243	0.0865965811669755	1.8670649495336	2.05443079590413	91.430391784635	2.66441764840817	84.8072769571841	1.18959642632448	4.17149878410882	1.22313318283811	1.83557075374102
cxcl8b.3	0.00584692960895603	0.00375362694203274	0	0	0	0.0266308038508142	1.12834978843441	0	0	0.0148063564104176	0.00184409230666414	0.000394064614538407	0	0	0	0.256863498495709	0	0
cxcl8b.1	0.777034574920992	1.51780691912868	0.191832126692831	0.0837673912359307	0.307167384761299	0.121581057765664	15.4068043202156	0.105506635716302	0.18286335565243	0.273798543801923	1.48532447881998	0.607594136222957	0.0521208992992665	1.26061179192573	0.17517641416755	7.73528756164115	0.0230039850661074	0.691643409680951
CABZ01030278.1	0.00198083110126682	0	0.000871995354706346	0	0	0	0	0	0	0	0.00614495329994772	0.000885667656577406	0	0	0	0.0211564149713145	0	0
si:cabz01030277.1	0.00450542298178718	0.0647118708327985	0.0303127782882583	0.0922558856865124	0.0423192320210414	0	0	0	0	0.00164694103563595	0.0354197970472616	0.0142206172531142	0.0582573824822038	0.0885935036540578	0	0.0308842752345701	0.0582869884916443	0
si:ch211-163c2.1	0	0.0320041784644761	0	0	0	0	0	0.0427745269137323	0	0.00290751877045692	0.0294115603728472	0	0	0	0	0	0	0
si:ch211-163c2.1.1	0.000185946837204213	0	0	0.0120606856623578	0	0	0	0	0	0	0.00400895761489472	0	0	0	0	0	0	0
si:ch211-163c2.2	0.0018849988164021	0	0.0028273926203245	0.0190410892129605	0.550797161428083	0	0	0	0.369756345844205	0.000762455546688237	0.00642843905167969	0.0200108076183536	0.00274081108822534	0.673214188719947	0.00797352788741379	0.00998757684613917	0.0352129241952623	0.462740966600453
f13a1b	0.0016344657135236	0.0105716427672573	0.0089338164704562	0	0.0562976774955892	0.0176796377968563	0	0	0	0.00639633006035399	0.0149046056773752	0.0323119534014646	0	0	0	0.00473690494506003	0	0
si:dkey-185m8.2	0.0358867641547211	0.00986248759853305	1.4564883727576	2.32348703965506	3.06283989787193	0.248006301641679	0	2.03041397047356	2.05220156987694	0.0227623084649679	0.0141185730330754	1.03927325175278	2.19074118166109	1.99248497794163	0	0.0551441738149093	1.48254074508948	0.858069069619902
jac7	0.00841543801413075	0	0	0.00936114861282914	0.0782821847214468	0	0	0	0.0874974844473221	0.0810189285875182	1.96317401581987	0.09622414059038	0.0677842370672797	0.0361697664156485	0.189717762352881	0.0415925196004991	0.0981150639700768	0.0467211123362425
aep1	0.00597260161038733	0.00639317134832082	0	0	0.0407340734793624	0	0	0	0	0.0362083746942232	0.0397349411286479	0.00649039260108919	0	0	0	0.0963768374635542	0	0
jac10	0.00135448497063477	0.011258408623941	0	0	0	0	0	0	0	0.0566351145806215	0.0180247724644956	0.000948518944579176	0.00411422740980585	0	0	0.0139426844129154	0	0
zgc:194686	0.00290117659421649	0	0	0	0	0	0	0	0	0.00480999618092496	0	0	0	0	0	0.0174283555161442	0	0
jac1	0	0	0.000654229844552372	0	0	0	0	0	0	0.0025704456330185	0	0	0	0	0	0.0104570133096865	0	0
CR382283.1	0	0.00417062876399246	0	0.00367732502552064	0	0	0	0	0	0.000957189874309483	0.126562188270614	0.0251970759156159	0	0	0	0.00697134220645769	0	0.0324304690743047
si:dkeyp-32g11.8	0.00114413160739936	0.0056292043119705	0	0	0	0	0	0	0	0.00556436711666513	0.00337362709687004	0	0	0	0	0.0139426844129154	0	0
jac4	0.00318720949606633	0.011258408623941	0	0	0	0	0	0	0	0.00254478627288163	0.00810345404483181	0	0	0	0	0.0174283555161442	0	0
loc564481	0.000973375765446361	0.0056292043119705	0.000811829788843884	0	0	0	0	0	0	0.00531575655526471	0.00696737812835349	0	0	0	0	0.0139426844129154	0	0
jac9	9.58189377755938e-05	0.0056292043119705	0.00130845968910474	0	0	0	0	0	0	0.0044205093540368	0.00308185275649066	0	0	0	0	0.00697134220645769	0	0
jac8	0.00156119932581168	0	0.00524449844959701	0	0	0	0	0	0	0.00136533981123358	0.00254006443635462	0	0	0	0	0	0	0
jac3	0.000676929092219133	0	0.00392537906731423	0	0	0	0	0	0	0	0	0	0	0	0	0	0	0
jac2	0	0	0	0	0	0	0	0	0	0	0	0	0	0	0	0.00348567110322885	0	0
tex261	0.0892270433230794	0.177792140213837	0.143511384092517	0.0410227132536726	0.0846391615718886	0.207177011921585	0	0.138542532557495	0.060084960133629	0.128809509536506	0.32115561093864	0.128526817918245	0.0695066236704227	0.131694859800071	0.19207647996696	0.0866986594672063	0.154350195694565	0.227170005704112
si:ch211-1o7.3	0.025584234008791	0.00871497677496557	1.39649771931515	0.0588313265743815	0.0193107976324962	0.579847889486574	0.366501740883269	0.0523516354650919	0.318817639948896	0.0278631498129613	0.0244727754637087	1.04120147431393	0.0144896374495692	0	0.545362867568162	0.0372106913714732	0	0
si:ch211-74f19.2	0.0173089705354844	0.0797211339949006	0.0649458376287042	0.0356018924469269	0.13945875234963	0	0	0.106352474608434	0.240465541287933	0.0190421976809823	0.062660606726397	0.149502426236894	0.0315997175668092	0.412708929911348	0	0.0384898799953952	0.0442963981504959	0.0740196690374985
si:ch211-183d5.2	0.0503228511368708	0.0738203499826422	0.0745856073105288	0.14562100190453	0.154814303397099	0	0	0	0.0816546498240342	0.0170492781624546	0.0754720702054792	0.016946868113799	0.0622046999083403	0.220864906043331	0	0.0211080908504607	0.0112784838108643	0
zgc:113057	0	0	0	0	0	0	0	0	0	0.00237173255573423	0.0115716001717129	0	0	0	0	0	0	0
pcsk6	0.000233886604570397	0	0	0	0	0	0	0	0	0	0	0	0	0	0	0.0513150947763127	0	0
snrpa1	0.0954750740971516	0.204329558335092	0.25008562976883	0.30423888819115	0.208414455197836	0.143075862043534	0	0.0523516354650919	0.350319682705197	0.143334131610765	0.231790217649529	0.333767264257201	0.234731384605721	0.217045058622169	0.292450201818539	0.295385224312619	0.319390389033029	0.447590451485898
selenos	0.288411119908713	0.966462692160739	0.49269050640346	0.523316664002759	0.464987912066436	0.752155987776321	1.12327261833988	1.09066244585526	0.672259153212167	0.230930101707056	1.23129627065185	0.529124531775186	0.665074235615666	0.642316368468936	0.70597071813843	0.429616697813704	1.03381539671625	1.07976197326976
chsy1	0.0325215644055133	0.14838066460862	0.126754106295094	0.137959606657803	0.0851619199217709	0.105350711271669	0	0.363731949041443	0.0749788184837783	0.0252010045745179	0.0821507145365004	0.175616293499083	0.177065564252778	0.111533754009875	0.196617924750494	0.0993236979292191	0.280951233000114	0.200840829781633
lrrk1	0.0276227705684757	0.0993469393824865	0.126712336214262	0.0688255109792676	0.0797826883413041	0.0501467459565188	0	0	0.0570528766060385	0.0221300915508969	0.103357678850766	0.054479842126379	0.0582176689010042	0	0.160335800903921	0.015285466454965	0.0278648554510624	0
asb7	0.0257011662294638	0.114264559482229	0.0976871169969688	0.119246416884133	0.064204339043634	0.138826400269438	0.359587688801508	0.405727004596834	0	0.0368509820734255	0.114565832815568	0.0843461738379282	0.0561600729871963	0.0399676688484051	0.100704348161434	0.0896550640438358	0.226982508122877	0.0898497031550266
lins1	0.00547849946760254	0.0099765125913573	0.00644587081804833	0.0105910160218816	0	0.00690202574455603	0	0	0	0.00410451940384017	0.00309644628484639	0.00174834927115873	0	0.0525933795453828	0	0.00254547231470147	0	0.0266562174294343
cers3a	0.145463096148316	0.0686106100512346	0.0406801899330465	0.0293679668615304	0	0	0	0	0	0.237125384826444	0.169271249105318	0.00504410294064704	0.00687604010682107	0	0	0.00918641674445411	0.0386348402942814	0.0085267375039596
adamts17	0	0.00571451429485751	0	0	0	0	0	0	0	0.000106409447984547	0	0	0	0	0	0.0128860927331819	0	0
mthfs	0.124735280451763	0.0823614341620773	0.0623632517788316	0.0165067986109678	0.0352268326368231	0.136357598567043	0	0.0427745269137323	0	0.102074844454274	0.134235365413273	0.107741570307359	0.0676542181128466	0.0399673866125242	0.184745135523199	0.0596974396693517	0.0297540858188423	0.194503357214442
zfand6	0.161121328782969	0.22511192936856	0.288300397339312	0.248504608128104	1.02569224442289	0.540464122472075	0.25546191090605	0.408713834872417	0.428784527788042	0.0839419297453632	0.213531361353465	0.218447839462905	0.140745475184029	0.759140585032508	0.203374605903791	0.203233039763478	0.295275359413567	0.128801706568579
fah	0.00406630838860107	0	0.00262760642134457	0	0	0	0	0	0	0.00164812605759657	0	0	0	0	0	0	0	0
arnt2	0.0705612978006022	0.0805071646365178	0.239618227592094	0.198538568978374	0.28107495390429	0.302230492589875	0.25546191090605	0.561335175535863	0.187566160866339	0.0431515829235257	0.11686560327365	0.146884307999313	0.165569637978397	0.296793236614304	0.172689389550691	0.0831430920404063	0.557459231130459	0.0533193807867934
abhd17c	0.053430103240452	0.384173244477661	0.0724437174108701	0.0776618625753913	0.00399147421108512	0.0923900819444988	0	0	0	0.0810803655449633	0.51365769271267	0.0650001091557496	0.00814494748545109	0.0621639961935663	0.123075974758857	0.101503035300386	0.0118168110680979	0.0208328859281896
cemip	0.0030724557124378	0.0700735226346731	0	0.014652129553458	0	0	0	0	0	0.00612619396740329	0.0446472504230212	0.001951054481538	0.046218109000918	0	0.00622732863170022	0.0177759035474966	0	0
mesd	0.0368256941580229	0.188683599620112	0.234898088028098	0.042684185097589	0.0263927896514954	0.114438602448803	0	0.193752108106278	0	0.0740706475862321	0.315451898557047	0.324245485752522	0.094700110421796	0.0683325392010929	0.208273242299373	0.175291959465265	0.173747294065164	0.0749541349341751
tlnrd1	0.0649957570903261	0.0939911970542207	0.076694483804304	0.153538670570508	0.08942067607039	0.10457883982132	0.0674036128336479	0.0219900077404827	0	0.062334702650265	0.0970521032780244	0.058715161232297	0.109878404848203	0.120345314330456	0.159779777295155	0.0569421113630188	0.0915713123195716	0.0608484873635008
il16	0.0052426679773178	0.0135529410140809	0.423665492776351	0.539306507253279	1.10770419880926	0.066881375045734	0	2.49627539306542	0.307581894845056	0.00494403836906664	0.0130178618386539	0.238124904775496	0.42345338108992	0.831869990425483	0.0570127577960757	0.0349375084649957	0.834206253246493	0.51229398053913
stard5	0	0	0.00103790286329377	0	0	0	0	0	0	0	0.0023915537972852	0.00227188062105678	0	0	0	0	0	0
CABZ01068273.1	0.00660170918348043	0.00645869663501905	0.00266613407408111	0	0	0	0	0	0	0.00610836908689796	0.00501070788274543	0.000848021489542962	0.0075918615244458	0.0145305963502048	0	0.000922983659128105	0	0
mex3b	0	0.011259850883186	0	0	0	0	0	0	0	0.00254971527116979	0.0414475515838899	0.0012305324209589	0.0080515622043567	0	0	0.0950828463807997	0	0
efl1	0.057495772317954	0.0415965634696305	0.0473266884456238	0.0499727903408811	0	0.126978575634797	0	0.0402149084708683	0	0.0490770020908549	0.106663163295381	0.0528687690016228	0.0572704964569501	0.0347292297106716	0.0121924391550636	0.0637280783418825	0.0442928211827398	0
saxo2	0	0	0	0	0	0	0	0	0	0.000905433615780332	0	0.00234916923979004	0	0	0	0	0	0
adamtsl3	0	0	0	0	0	0	0	0	0	0	0	0.00126041353663972	0	0	0	0.0199087755878814	0	0
zgc:158785	0	0	0	0	0	0	0	0	0	0	0	0.000306358789154874	0	0	0	0	0	0
sh3gl3a	0.0239159230226264	0.237771742878159	0.734322332754466	2.36249330549616	1.76376464590243	0.0330976451221952	0.269614451334592	1.26466698826003	1.8251265543723	0.0301044403723422	0.218175230249671	0.617323057417821	1.28347590396724	2.06524319252014	0.0440945371804599	0.432214723224444	0.791617703782215	1.31151064959578
fth1a	4.23237638830456	3.8418238871789	27.6492890433055	3.68324413646776	45.0390125297523	28.6163234504755	5.45638724286924	3.549117601302	12.9823487399365	5.0488446827776	4.16020986092632	39.6768708689505	4.1324827928097	38.9371063975113	24.7984994757124	5.93947869799558	4.1258548942855	7.6983224094601
saa	0.00693792979983378	0.0664505157469908	0.0573129320269469	0.00446249075706602	0.0138158758229081	0.032718513087455	0	0	0	0.00789186171980801	0.0175141204774671	0.258503741050481	0.0019760736996447	0.0503357796604865	0	0.15668506207366	0	0
rplp2l	21.3159195597669	41.917201829582	43.215225344097	45.2571159772873	20.3714729389337	38.8661389043296	41.0188064359061	45.1689904184575	34.1473150967077	19.3314319676415	35.9032617586659	52.8943812849896	55.0143215457925	22.1441887064281	35.9204850778534	41.7629319069925	48.8592292293316	44.8525662477497
slc25a22b	0	0	0	0	0	0	0	0	0	0	0	0.000504797265089185	0	0	0	0	0	0
syt7b	0.000992431321767671	0.0173289202349802	0	0	0	0	0	0	0	0.000573799050064197	0	0.00587431204463067	0	0	0	0	0	0
sdhaf2	0.122605252255749	0.134261692673553	0.100605885761189	0.128575079285098	0.183610822440251	0.182553162029393	0	0.208396067449597	0.264854810965743	0.203999101181244	0.14429247984605	0.211872390881149	0.222593701108827	0.198648988231224	0.0590811941212594	0.226566063789735	0.279292312278142	0.0366950534309697
polr2l	0.188762514740751	0.371493468642422	0.423457354621006	0.262150085792058	0.420967419478133	0.416841050786352	0.337018064168239	0.873014956878442	0.296522020584986	0.324221739931084	0.572076836418406	0.513279300253475	0.541101508999616	0.333431584084567	0.477889753382369	0.312372898881552	0.679075047470927	0.256514836811916
si:ch73-119p20.1	0	0	0	0	0	0	0	0	0	0.00152908821884743	0	0	0	0	0	0.027508197442838	0	0
dagla	0.00748675291387013	0.0862253823386512	0.0023450870660475	0	0.0131546060853208	0.010769015388923	0.0674036128336479	0	0	0.00894884161134226	0.0726115495853502	0.00131737714825041	0.0101631907038106	0	0.00606943432872056	0.00741208450623112	0	0
RF00001.81	0.000840594034354574	0	0	0	0	0	0	0	0	0	0	0	0	0	0	0	0	0
arih1l	0.123289923202106	0.201000219272347	0.142274781977254	0.245321395520819	0.103231179254112	0.114132928665957	0.390269136573346	0.246350421821726	0.156351734619083	0.105429697475129	0.270134477047851	0.1136138234397	0.109850610083991	0.0701371241748847	0.282958286528128	0.293749158906498	0.102904835778154	0
plekho2	0.0309782199273807	0.0610681752598826	1.45059270129219	0.784500903159063	1.44191892826164	3.62958984376379	0.853982603270311	1.79339027221937	0.381804217798685	0.0327556524260507	0.0822733419851737	0.918426024073307	0.53937712956788	1.4373866994784	3.92632846590357	0.419652517557	1.24262422471031	0.378571750344689
ankdd1a	0.00509679961151696	0.0505488838782136	0.0357639143213868	0.0100449788489036	0	0.0111474642305742	0	0	0.143993368442256	0.00277951183571695	0.0302703392968496	0.0288553509211623	0.0147807781031061	0	0.0511069714008851	0.0514499177769251	0.0511249818838706	0.218708118870959
spg21	0.0785977783907786	0.202652410066093	0.494737775384849	0.195726597080041	0.312379431832523	0.441486941534187	0.0674036128336479	0.15722729755569	0.384734809079224	0.136445313949387	0.281285068239108	1.12240549894422	0.273102930217444	0.280323372440283	0.718224484584579	0.250270805494845	0.327914195302833	0.0816806701106954
clpxa	0.142778104337646	0.136479979025769	0.221876632310625	0.497930246795878	0.176511081155912	0.252547300140516	0	0.223525492585803	0.0570528766060385	0.199169355787244	0.180621003363478	0.313522742440806	0.301304779944309	0.0461679587306128	0.218149890447723	0.236551919263764	0.326616167388145	0.141116348944967
pdcd7	0.0867865082090655	0.137646245810044	0.0720723902060093	0.108564006949888	0.078067348744216	0.103811451393404	0.310655483069276	0.0627321088025695	0	0.113736497184824	0.0610200072251075	0.0989750262208238	0.107835355103027	0.0370184671130136	0.0363260445411495	0.0676178418414953	0.0212921798082	0.0392848584370126
rasl12	0.00131432503889088	0	0	0	0	0	0	0	0	0.00322031342607225	0.000321263547523167	0	0	0	0	0.371345137275934	0	0
abhd2a	0.337451451642672	0.762897254101933	0.428235394437476	0.516488691619425	1.68553580153056	0.535420060853987	0.51286632157022	0.505406008982295	0.796375442347578	0.150755309475854	0.580467833509	0.201660337108418	0.361225341316149	0.78208089329247	0.494631973317201	0.390873498191643	0.273879899309721	0.240728964458336
rlbp1a	0.00107148417380373	0	0	0	0	0	0	0	0	0	0	0	0	0	0	0	0	0
slc39a1	0.0331415525785045	0.0672671189088647	0.392017462871063	0.0303494570651367	0.0498929528301826	0.209635725256934	0.269614451334592	0.353874364574592	0.138193797491712	0.033218199652546	0.1107780170853	0.400537098048407	0.0570964266807171	0	0.540811858675416	0.104378787355959	0.316186727396831	0.290002617235614
strc	0	0	0.00103794692437643	0	0	0	0	0	0.183697394284118	0	0	0	0	0	0	0	0	0
furina	0.270814844980768	0.551479429096753	0.316188554057977	0.60309130176898	0.543160979094436	0.108472102487029	1.12597342151966	1.08106926014392	0.747665556444395	0.178429398683221	0.455218596006703	0.165742072908973	0.136792086734629	0.396622142930511	0.19430189984128	0.148348597246471	0.198763607521313	0.18358408020863
RF00001.82	0	0	0	0	0	0	0	0	0	0	0	0.00236716134463299	0	0	0	0	0	0
fes	0.0348080860455952	0.181747905972396	0.72725498393141	0.15438172273022	2.35170812150905	2.85573779247455	0	0.411098713125005	0.492270154299522	0.0970875778799357	0.308196955605702	0.461385979316454	0.187977445099624	0.752356419710179	2.47933215941237	0.131034220172621	0.52676523107723	0.211421880768515
rhcga	0	0	0.00289743316088009	0	0.061969058681163	0	0	0	0	0	0.0179323165308281	0.010478265281893	0	0	0.0627774208921048	0.00396927463887539	0	0.0436957899106421
CU467822.1	0	0.00385753357018589	0	0	0	0	0.310655483069276	0	0	0	0	0	0	0	0	0	0	0
kif7	0.0388812609365569	0.0365706044326266	0.00707644036113424	0	0	0	0	0	0	0.0231784623465596	0.0344214352889829	0	0	0	0	0.00846348743642595	0.0163791310215828	0
mrps11	0.112745106139805	0.174971118612671	0.184835525563395	0.134529857264181	0.0389167897733418	0.195741727400893	0	0.0885959316748175	0.120894390896863	0.211587352139907	0.225796340922208	0.314803347380585	0.297823722210226	0.168541697165272	0.247504691969527	0.209164894366726	0.259682103810787	0.181841425517092
mrpl46	0.0582978339855229	0.0772967493390269	0.0470001117722159	0.0501985962495722	0.0296850417074836	0.0751767477757704	0	0	0	0.0880819534199566	0.109871919800904	0.0999373640992935	0.0619417603584595	0.0413318070309332	0.104820532013208	0.0231457716869373	0.0914126686707681	0.0021316843759899
ntrk3b	0	0.0158375698832771	0	0	0	0	0	0	0	0.00155266001714137	0.0125356078437428	0.000764419863419574	0	0	0	0	0	0
CU280645.1	0	0	0	0	0	0	0	0	0	0	0.000222285884899657	0	0	0	0	0	0	0
si:dkey-172h23.2	0.0686273075937463	0.386721326528546	2.35293152385894	0.984524302291793	1.80660788332209	1.57981722746322	1.60081418920037	0.105506635716302	4.5441433243225	0.176445178567795	0.921643705643966	3.03596597476133	0.861680286696715	1.46355962909829	2.19886733079559	0.509157303175505	0.432272691253645	7.28879096300303
sv2ba	0	0	0	0	0	0	0	0	0	0.00284603194841624	0	0	0	0	0	0	0	0
mespaa	0.000233886604570397	0	0	0	0	0	0	0	0	0	0	0	0	0	0	0	0	0
si:ch211-276a23.5	0.00576625152640683	0	0.0963974667036807	0.00818908264258421	2.54956389916727	0.0516398690262779	0	0	0.0661222600588488	0.00140937604166345	0	0.0324495374297407	0	0.461618894493359	0.0468365691731674	0	0	0.0119764208226843
si:ch211-106j24.1	0.00191722643287752	0.099597697864682	0	0	0	0	0	0	0	0.00218988164909965	0.0532679304102317	0.000731729251103649	0	0.04110316394726	0	0	0	0
igf1rb	0.00372871257159169	0	0.0338786650398418	0.00197832507481531	0.00399147421108512	0	0.800407094600186	0	0	0.00252291433543331	0.00556458743975119	0.0157095074166958	0	0.0281352517823682	0	0.271866764521786	0	0
lrrc28	0	0.00136890852816324	0	0.00528732933822729	0	0	0	0	0	0.0045803921637544	0.000546491747045584	0.000791549162253124	0.0137231730984436	0	0.00622732863170022	0.00287232514720666	0	0.039579977281093
mef2ab	0.000370527803517109	0.00266400266400266	0.000772459173215318	0	0	0	0	0	0	0	0	0.0103913277811121	0.00279675296980206	0.0784432697195542	0	0	0	0
mctp2b	0.0342039938592039	0.144063775240984	0.0106279864700031	0.0573293406456224	0.702984328009783	0.685960208215786	0.378059095902924	0.146635988517968	0.060084960133629	0.0284120336674031	0.172972850681518	0.0252254649068031	0.0603022808911541	0.591161035527594	0.79994337367678	0.187790600677945	0.0361302817137372	0.0989347220891934
rcn1	0.019620948014648	0.0640578422277757	0.00487443253862347	0.0079563881752922	0	0	0	0	0	0.0153389774569028	0.0852746982643561	0.0117353035133888	0.0144087892861479	0	0.00606170818936776	0.0510972672883938	0	0
pax6b	0.00226013127204836	0.17250167899725	0.0113712864562931	0.00281298699837409	0	0	0	0	0	0.00199793356219161	0.300314606043092	0.00959225370220106	0	0	0	0	0	0.035151732453134
elp4	0.0254914085730551	0.0588232193241468	0.066592043349401	0.0408627880552333	0.0189118142103372	0.00820031735228153	0	0	0	0.0218711628153287	0.0633643345212323	0.0505538407065019	0.0536088930956583	0.0291490710608537	0.00714043449543905	0.0185038896379561	0.128441786818148	0
immp1l	0.0097646176960231	0.0121330900962501	0.00813675444204471	0.0110652821598459	0	0.0563263176925713	0	0	0	0.0154931882805654	0.050621691802287	0.0147872825844537	0.0159485798357902	0	0.0185245347317598	0.00836965795852688	0.0690788207289773	0.0229597672967536
BX957347.1	0.00033787822341738	0	0	0	0	0	0	0	0	0	0	0.000394064614538407	0	0	0	0	0	0
si:ch73-367j5.3	0.00807985528617151	0.103042346752068	0.0124557640987488	0.0169122136931384	0	0.0708158526056693	0.310655483069276	0	0.0920522120146547	0.00874779800435386	0.0721741844899279	0.00811971339057102	0.0309092177549332	0	0	0.107448912476849	0	0.0021316843759899
CT030144.1	0.10837546754579	0.0413790772936388	0.00526866446059626	0.010818688747328	0.0142594361818934	0	0	0	0	0.102979614711421	0.0319145627016066	0.0116487121601737	0.0108981135365468	0	0.00718971870225578	0	0	0
btr04	0.0779188713460377	0.0503753558954505	0.0144600870477121	0.016618756106925	0.00618394770853818	0.131819924755565	0	0	0	0.0640266831810277	0.145166773005625	0.0220442974120394	0.0118036621305355	0	0.215258988295886	0.0637580609782696	0.0316865192165475	0.0021316843759899
btr05	0.180113500589667	0.0369980686122594	0.0105840994339599	0.0238693158916722	0.0284340742618744	0.0157387369663585	0	0	0.194597960613373	0.139694096044558	0.00379227297234125	0.00143382458475042	0.0065984633593063	0.0256595136495783	0.0253052445119251	0.0218122782156041	0.0439766038251876	0.0021316843759899
btr06	0.0509627448455785	0.0301553581435035	0	0	0	0	0	0	0	0.0310410894333245	0.00538619759934181	0.00435127873203738	0.00507042449376221	0	0	0.00372767680743865	0	0
btr07	0.12379223200376	0.0261111880243835	0.0102956838343824	0.00271813953134382	0	0.0178049025762785	0.188058298072402	0	0.0920522120146547	0.0822759092259037	0.00900104362280532	0.020615771463825	0.00929463325573738	0	0	0.00697134220645769	0.0428892321411272	0
BX957276.1	0.00160436698242945	0	0	0	0	0	0	0	0	0.000964401249555411	0	0	0	0	0	0	0	0.0328504319831806
mpped2a	0.0331695100455186	0.0911079691235109	0.0942122192885347	0.110417950457155	0.093927414488128	0.0653429893272593	0	0.128869674940136	0	0.0258215340234489	0.104797858205572	0.0637164193033484	0.0659996884536814	0.0627994644431797	0.0929280689785418	0.0327184226016187	0.0690865893840801	0
zdhhc13	0.10255387206499	0.305708596748635	0.31872411248921	0.289018060790922	0.223607460358422	1.18174603493021	0.310655483069276	0.499334779695889	0.245499378938297	0.195540573626357	0.371463855984988	0.278689091349473	0.307702190948308	0.487463359072649	0.981051524923438	0.323137582836312	0.522521765174079	0.174280685525482
e2f8	0.086423386353944	0.0574541975023713	0.119392854845446	0.0141413713830754	0	0	0	0	0	0.0835234445142653	0.0607755969375603	0.118263341340913	0.00203900826715902	0	0	0.0314661914373843	0	0.0194196627969752
nav2a	0.103051418687416	0.301994999557671	0.00585908124348251	0.0214456560531297	0.0189492633473874	0.0674193375408255	0	0	0	0.0847532854444133	0.266308677612513	0.00587218172819152	0.00937763792159033	0	0.0133276063482224	0.149296559521391	0	0.0729054622940098
CU929054.1	0.00350300688001929	0	0	0	0	0.0621851874883403	0	0	0	0.000632270903742203	0.000519214142396348	0	0	0	0	0.000791888276600874	0	0
htatip2	0.223481012456132	0.198287986290495	0.159901204405621	0.0873760824700377	0.0528496933727848	0.435079520087504	0.0674036128336479	0.0829894353846006	0.179549696461977	0.777786879110384	0.567175327968755	0.227732951699005	0.409399629287324	0.322801782841688	0.860928960432213	0.334002812674824	0.214794838427687	0.166384392940627
prmt3	0.0270445290178328	0.0786826946507347	0.0298810346866519	0.0331242595397727	0.0450432539013628	0.0158173063198846	0.188058298072402	0	0.0749788184837783	0.0382410161876459	0.107684968809406	0.0966458125429817	0.0630313542010443	0	0.0390535589674449	0.0667766232239496	0.0228306020865068	0.0503662975343924
slc6a5	0.0057234481309612	0.0527894802305689	0.00527044881304059	0.00335470616631895	0	0	0	0	0	0.00718234039037671	0.0340510319875046	0.0116562492743434	0.00884372692340006	0	0	0.023778272365843	0.0463561730197802	0.0464990839680458
nitr12	0.00216242310120061	0.00168968867486166	0.0929002661986702	0.480411069221712	0	0	0	0	0	0.00150742086950441	0.00543424095160659	0.0134136910846056	0.76051610636879	0	0	0	0	0
nitr9	0.00266003163000692	0	0.00210375819571599	0.871117167140189	0	0	0	0	0	5.94036162070173e-05	0.00351969161869914	0.00696615663679996	0.940603900464251	0	0	0.00138029654290928	0	0
si:ch73-46n24.1	0	0	0.0122316020787071	0.0319682670869015	0	0	0	0	0	0	0	0.00189969785305647	0.00662888203904412	0	0	0	0	0
CU179757.1	0	0	0.00462487993524411	0.0424022511624306	0	0	0	0	0	0	0	0	0.0522909317519058	0	0	0	0	0
nitr10a	0.0037750806923498	0	0.00844992812786659	0.0464480464821087	0	0	0	0	0	0	0	0.00045350647121989	0.0139087410699489	0	0	0	0	0
nitr8	0.00495814234358048	0	0.0559566858808403	0.819490550611364	0	0	0	0	0	0	0	0.00492666717346619	0.105376817478579	0	0	0	0.0118989399234422	0
CU179702.2	0.000279608881977454	0.0132374938776591	0	0.0674697913410285	0	0	0	0	0	0	0.00114178608226706	0.019547137695758	0.0783691266292578	0	0	0	0	0
nitr7a	0	0	0.016219281844735	0.0564815588201733	0	0	0	0	0	0	0	0.0149536684529004	0.0345837750329986	0	0	0	0.0216806398390429	0
nitr7b	0	0	0	0.0678330742185044	0	0	0	0	0	0	0.00556172288826944	0	0.0363136141000873	0	0	0	0.0578150395707812	0
nitr3c	0	0	0	0	0	0	0	0	0	0	0	0	0.00844173933597278	0	0	0	0	0
nitr3a	0	0	0	0.00514561313325131	0	0	0	0	0	0	0	0	0.0168834786719456	0	0	0	0	0
nitr2a	0.00057745732489314	0	0.123097492532395	0.281265623280518	0	0	0	0	0	0.00140359860224037	0.00322352918422147	0.0557225833298141	0.104046536572958	0	0	0	0	0
nitr2b	0.00358800010773522	0.0134740019133083	0.124185659595503	1.46560936865404	0.0443101158386612	0	0	0	0	0.000326163221991647	0	0.0365191686295592	0.888179270711033	0.0413156557414301	0	0	0	0
nitr1b	0	0	0	0.00735209071392949	0	0	0	0	0	0	0	0	0.0119512414564175	0	0	0	0	0
nitr1b.1	0	0	0	0.0031637740280728	0	0	0	0	0	0	0	0	0	0	0	0	0	0
nitr1f	0	0	0	0.00172441651349537	0	0	0	0	0	0	0	0	0	0	0	0	0	0
nitr1i	0	0.0126310471138057	0.0294933980817026	0.185210208311509	0	0	0	0	0	0.000185932302494899	0	0.0031212696703047	0.246768086672304	0	0	0	0.0151530304545606	0
nitr1k	0	0	0	0	0	0	0	0	0	0	0	0.000848021489542962	0	0	0	0	0	0
CU672228.1	0	0	0.00133176522417404	0.018479179655939	0	0	0	0	0	0	0	0.000848021489542962	0.0168055367166848	0	0	0	0	0
nitr1b.2	0	0	0.0051958844359826	0.208759907052547	0	0	0	0	0	0	0	0.000848021489542962	0.196513169181226	0	0	0	0	0
nitr5	0.00375188472097796	0	0.0456046620265537	1.02254510083456	0.0347403161368768	0	0	0.0535630115267601	0	0.00240013078882563	0.00418953984409109	0.0150546056751677	1.55597833950744	0	0	0	0.0135076358665554	0
nitr4a	0.00377962964423524	0	0.0353462073595569	0.932193827669301	0	0	0	0	0	0.0023288882982454	0	0.0153153516626582	1.24326958051636	0	0	0	0	0
nitr6b	0	0	0	0.00547705115565779	0	0	0	0	0	0	0	0	0.00732553330416734	0	0	0	0.00722687994634764	0
nitr6b.1	0	0	0.0471539910265852	0.422207761536506	0	0	0	0	0	0.000437909737627651	0	0.00721345908953779	0.416618025997857	0	0	0.00373429170195572	0	0
nitr6a	0.00162357798921814	0.00746669188720939	0.00588894672144995	0.828734919827877	0	0	0.0674036128336479	0.172034131571704	0	0.00172463118590359	0	0.0111012419804756	0.850273707394199	0	0	0.00372767680743865	0.159216053345697	0
nitr6b.2	0.00617072471094144	0	0.142435872156207	1.94405979087906	0.0394638182559623	0	0	0	0	0.00202098063746728	0.00587353572754312	0.0315997872414346	1.01228477343904	0	0	0	0.0212921798082	0
CT030012.1	0	0	0.0155416828920568	0.186209495867961	0	0	0	0.436313154401562	0	0.000185932302494899	0	0	0.0377977515239764	0	0	0.0163427763644136	0.224417165668812	0.0193866828997825
map4k2	0	0.00389503655491807	0	0.00690214007755244	0	0	0	0	0	0	0	0	0	0	0	0.0928543343767414	0	0
men1	0.0130780858139824	0.04602955368042	0.0663326263827938	0.0575606680600609	0.00399147421108512	0.0181006102434754	0	0.619828461502422	0.158503734692007	0.0197797364644497	0.0473213848310474	0.0706027432618437	0.0367034143979429	0.00739693663266295	0	0.0324241885544966	0.0878614692812836	0.0206584680093294
rtn3	0.575447043703041	0.466052669500908	0.163839825571194	0.192600229340365	0.0818376804788161	0.283997638003435	0.134807225667296	0.316345088148547	0.203957683123543	0.468403210569363	0.553565711000507	0.129084708739723	0.16616269934017	0.100083989198071	0.323076413762218	0.519757134178118	0.130146245888043	0.118455036028214
si:dkey-106g10.7	0.00574874213321917	0.0157029606300445	0.001366754863358	0	0.0299213069626881	0	0.188058298072402	0	0	0	0.0171472193625019	0.000896698535332612	0	0	0	0.00913313324125835	0.0340330529009774	0
si:dkey-28a3.2	0.00978406291293557	0.0292562947488305	0.0180297924295386	0.0160556336592769	0.0169396778073281	0.121923281595783	0	0.0219900077404827	0	0.0206762438451208	0.0416887143535465	0.00735368581838267	0.0591364509356641	0.034854013962518	0.0447028971913583	0.00406519729266508	0.187314844745945	0.0206584680093294
ecsit	0.0346659438551189	0.00402876506720969	0.0200619313130821	0.0345894042275172	0.0642202885543803	0.0674245343041002	0	0.0885959316748175	0	0.0428911585082721	0.0219384184319945	0.0364330686714133	0.0568584478316179	0.00580972117405169	0.0549243885805968	0.00807262274534703	0.0987497455118724	0.0063950531279697
eml3	0.0527443271847665	0.0967280885779206	0.83595431667837	0.279041138320174	0.292775055663546	2.40300100729905	0	0.499858547688072	0.0962667744854541	0.0569464004620392	0.0608152406349125	0.564182190665788	0.238531855490775	0.278464233643278	1.40250781949344	0.0508098283959971	0.376092297063329	0.122053571227207
mta2	0.270444422342802	0.486271483702683	0.335614429161129	0.297761883138898	0.166826590244664	0.412124499029584	0.322865523739698	0.252839195855128	0.2570661362747	0.185330837285677	0.291808765680387	0.203238698945288	0.271527475717413	0.229686471531662	0.444920925940852	0.252171073929445	0.230773160892246	0.0672776085696873
cth1	0	0	0	0.00274094405787997	0	0	0	0	0	0.00397815515441607	0	0	0	0	0	0	0	0
taf6l	0.0138684051210915	0.00958965356131135	0.0297060841912015	0.0333566126086186	0.0247386975075762	0.0419727859144043	0	0.157194175471967	0	0.0150715242797571	0.0515121108713835	0.0234047264461929	0.0402430437558428	0.0307925383521065	0.117014082724557	0.0624642169879114	0.13859155299656	0.0557256989964371
kcnk7	0.000353728392766424	0	0.000438476314101455	0	0	0	0	0	0	0	0	0.00118448018258051	0	0	0	0	0	0
ehbp1l1a	0.0136223778029535	0.124861692456821	0.170148749307581	0.217582319235497	0.298900953689618	0.178953238516304	0.378059095902924	0	0.221153547844388	0.00613738046099666	0.0838459849942096	0.170487778329148	0.0353659290468137	0.130001301311589	0.0935270724800894	0.116040194118036	0	0.112705517032491
si:ch73-40a2.1	0	0	0.00868457483437106	0.00535114193368865	0	0	0	0	0.0624574508616005	0.00128122078816603	0	0.0206946099255305	0.00291124628998051	0	0.00718971870225578	0.0104248762567188	0.014042833450591	0
rab1ba	0.327870524340922	0.939147110487467	0.78138624404967	1.13681156359666	1.31222011837279	1.1792502612084	1.07466484887267	0.905850131617991	1.42304217525284	0.232994505193335	0.998494897449046	0.720958212011989	0.856877150570819	0.934044343577816	0.709623209803479	0.709399784108659	1.0034802277997	1.31615197884141
peli3	0.00732362971949185	0.0931437675954964	0.0173524312895125	0.00611870808513071	0.269243382265224	0.00841885486736094	0	0	0.240465541287933	0.0103847443944226	0.0779566154680365	0.00106363686784883	0.00485354430072561	0.155763295648236	0	0.0881323218196146	0	0.0345621534502946
rce1a	0	0	0.00185156211666878	0	0	0	0	0	0	0	0	0.00250575043185582	0	0	0	0	0	0
CT027807.1	0.00405627620460905	0.000476395326180734	0.000752257638010315	0.00544024946807961	0	0.0621851874883403	0	0	0	0.000719236941390245	0	0	0	0	0	0	0	0
cd248a	0.00185404786854949	0	0	0	0	0	0	0	0	0	0	0	0	0	0	0.134817228076958	0	0
znf16l	0.0104421805606453	0.0322429913084423	0.0313999296915077	0.032929683556713	0.00816943406245532	0.0436007606840623	0	0.122369065100343	0.05780848050409	0.0199242878085677	0.0354073256975331	0.0317966776912934	0.0199833474645156	0	0.256348878489645	0.0486847813923311	0.139547872333649	0.0615363140905096
rgs12a	0.0340977684507313	0.0873113719856552	0.0297815094117562	0.00989082162575332	0.0215658999989217	0.111696448824209	0	0	0	0.0272183149543822	0.0580600723407766	0.011677965997524	0.0248526437887353	0	0	0.0636310407669965	0	0
msantd1	0.00211872004967942	0.0147653234633852	0.0406951398993097	0.0748026784371012	0.0344604898097984	0.166454386043267	0	0	0	0.00553305283847583	0.0141804396326552	0.053452197112888	0.0491972373953095	0.0664772702037144	0	0.00556139650620056	0.0130571485276759	0
DTX4	0.0025979182067505	0.00876616261231646	0.0186547975041077	0	0	0	0	0	0	0.00540820188029982	0.0051343232669288	0.00230429527336067	0.0103652721920478	0	0	0	0	0
si:ch211-119e14.1	0.0347490756626842	0.0369352036275451	1.93656567644662	6.11830870788657	0.263792419652152	0.02854497116783	0	7.4499912602926	1.20059151628045	0.0293476722010232	0.0204754013189754	1.02301248153618	6.20713236373087	0	0	0.201767543191396	3.78700979309644	0.587025329761143
coro1b	0.00407745588478635	0.0776396925110457	0.0665631249195397	0.00861506406855888	0	0.00958781963393705	0.134807225667296	0	0	0.00301926387284864	0.0574670043812225	0.00379088622955712	0.00448451608708033	0.0275680310085213	0	0.0780475610337842	0	0
nectin4a	0	0.00486731694020988	0.00227673691690206	0	0	0	0	0	0	0	0.00875020726689387	0.000778434560314861	0	0	0	0.0126553699772102	0	0
trmt10a	0.0416273011539233	0.0418170421575963	0.0424854947425079	0.0562397850029307	0.00814960804062242	0.0974658830339251	0	0.108350791661641	0.0853322410806475	0.0425522594232739	0.072946449132239	0.0429236242149231	0.0844336927305357	0	0.0992973543328255	0.0697953643126743	0.0771472453906034	0.0233446321352868
si:dkey-38l22.2	0	0	0	0	0	0	0	0	0	0	0.00663125698063915	0.0158207321201996	0	0	0	0	0	0
mllt3	0.00451298827216548	0.0235524613972496	0.0023285597857725	0	0.0234074178107042	0	0.0674036128336479	0	0	0.0170842357745893	0.0799679339852775	0.00232583794915116	0	0	0	0.0488085680352637	0	0
focad	0.00976801112100281	0.0200961208240696	0.0215384604618648	0.0175815010092893	0	0	0	0	0	0.0134097888924132	0.0265396549409781	0.0348568919797677	0.0174355122546991	0.0352288820466571	0	0.0404653606582807	0.0457094339965687	0.0763262697215943
zgc:194252	0.000213102741392024	0	0.00569747748927961	0	0	0	0	0.0496978371501272	0	0	0.00761587759200926	0	0	0	0	0	0	0
HACD4	0.00309137689491886	0.0476221178952075	0.135745086065677	0.0232350592336615	0.636809565964792	0	0.433905353716917	0	0	0.000361695884942514	0.0257719803305618	0.107650497177031	0.0177117459579344	0.690021881160523	0.00667902285895574	0.0651929445194484	0	0
CU972454.3	0	0	0	0	0	0	0	0	0	0	0	0	0.00564337270526357	0	0	0	0	0
CU972454.4	0.00137666709892849	0	0.270325973886444	0.507529567735052	0.645121458917233	0	0	0.53467717380931	0.144209779979634	0.00040117812969352	0.00113912575743319	0.104111787941455	0.0756986070705449	0.192849698894092	0	0.0076085407237219	0.179556772070989	0.334144093924031
fcer1g	0.0322760225304568	0.0413067003462246	1.66200094008032	3.36963294951404	3.75734308069779	0.0159535260088825	0	0.708247025591521	2.63180296399722	0.0172472250026491	0.00651863548921598	1.19969266629209	1.94584468834275	1.84840591475409	0.0392061397455596	0.139793137429976	1.59174011696185	2.87982384628369
ndufs2	0.359218340182244	0.350307653539179	0.565938379238622	0.301747927345166	0.439792168834798	0.565384287705365	0.134807225667296	0.439596617853187	0.199920692938894	0.495861710586901	0.585122712233349	0.899164024887938	0.401290885735556	0.573438474373533	0.313104599040523	0.381971938081645	0.706780620648101	0.107850116748316
kirrel1a	0.000261268756614672	0.0287785273368046	0.00257719803421643	0.00401953672988891	0.0131546060853208	0	0	0	0	0.00334528935482656	0.027963391054576	0	0	0	0.0422609614368727	0.14020107709232	0	0
il13ra1	0.277701434039532	1.00598126057023	0.464953271182815	0.0485957303441064	0.0123678954170764	1.15735724402767	1.78130574954025	0	0	0.238407648568581	1.37763466351383	0.233326811927366	0.106279064107494	0.156285542563323	0.975062322596719	1.42209205240265	0.0427480629420839	0.0477482359784291
dock11	0.00964887273486782	0.046322586414215	0.432697807516685	0.582935242490701	1.35734521915776	0.16928340753828	0	1.05576157335354	0.813174946868298	0.00933117004540383	0.0531459828876148	0.356008954458517	0.573659821495508	0.732722906701465	0.211683463590812	0.109707525938055	0.877366322931367	0.373440251421723
ntn4	0.0160759679905186	0.0207158541087919	0	0.000801427695353611	0.0128510753137269	0	0	0	0	0.0186669749699595	0.0111689186305044	0.0094157671776553	0	0	0	0.00643376439554784	0	0
snrpf	0.608213606612064	0.929355195417044	1.43397034006032	0.651563498474221	0.838442132383208	1.19827343721133	1.36728279199717	1.27568871892243	0.56410547015975	0.709831119764857	1.26406956440525	1.57056034621552	0.790318240512463	0.933437915640433	1.0086613919975	0.767465126263248	1.3926292778946	0.345523148606126
AMDHD1	0.0157475208448343	0	0	0	0	0	0	0	0	0.0149038866877841	0.00350089949481456	0	0	0	0	0	0	0
si:ch73-71d17.2	0.00505851788338806	0.0169731718490405	0.0259372627463768	0.0631690896236513	0.0396322130627774	0	0	0.0668914218440627	0.11561696100818	0.00293565689472614	0.0263227419311849	0.0176247341281523	0.0752697830722812	0.0304266732388281	0.00631014355576589	0	0.0520275075829132	0
si:ch211-212k18.6	0.00148312457709922	0.00138923040803086	0.00552598613106905	0	0	0	0	0	0	0.00104203485231448	0	0.0200797203900345	0	0.0254370724982003	0	0.00878348704435661	0	0
si:ch211-212k18.7	0.844873028971639	1.06300687792442	8.97346141822628	0.564351116694486	3.98564048524971	2.94318791636761	1.34113902939233	1.50163965979524	0.512766629472737	1.35889823284063	1.81540196593301	8.34146710021787	0.548352935558328	3.36223173313171	3.52682048163664	1.25255627498926	1.52862811826798	0.704191547920804
si:ch211-212k18.8	0.00191157795255062	0.00417062876399246	0	0	0	0	0.188058298072402	0	0	0.00299395460685783	0	0.000702580127155762	0	0	0	0.0455565317932637	0	0
si:ch211-212k18.9	0	0.00135673980850974	0	0	0	0	0.376116596144805	0	0	0	0	0.000300654232629829	0	0	0	0.0783123393438036	0	0
man2b2	0.0208772379505098	0.0264846677673892	0.198456920141691	0.0145357274505162	0.0239071446501787	0.0921189773575035	0.0674036128336479	0.0535630115267601	0.136183572869099	0.017178252709472	0.0309051627734	0.0843750257836902	0.00564195584041164	0	0.0135253939270981	0.00364612360585617	0.019188848976083	0
ttc5	0.0040924310307468	0.0176274910188096	0.0132687327842298	0.0176778500037859	0	0.00749080503681731	0.188058298072402	0.068927488282327	0	0.00766918915145953	0.039114839739372	0.0286673624172439	0.0160778957095339	0.0176431254443862	0.00606943432872056	0.045949795257866	0.0667581612206286	0
CCNB1IP1	0	0	0	0	0	0	0	0	0	0	0.00557077615395843	0	0	0	0	0	0	0
si:ch211-212k18.5	0	0	0	0	0	0	0	0	0	0	0.000304702194739439	0	0.00233960542554498	0	0	0	0	0
slc7a7	0.432284485689694	0.0635220009152962	1.88626185265477	0.0645014995523193	0.134436714254539	0.0404154036510344	0	0	0.0972989803066864	0.327769189854319	0.110121598465349	3.22969051906885	0.168369033066779	0.347004168254897	0.0601519373646962	0.0946389051835795	0.0922781373923604	0.283130074422839
oxa1l	0.102376361690706	0.141280660393745	0.0860134651630191	0.0714976512300652	0.15737595478764	0.275279321752954	0.0674036128336479	0.069816800714924	0	0.0875685539003271	0.0974462387733482	0.144265726435093	0.0774633784242049	0.0948256892413949	0.141453566910941	0.128314153043764	0.0824802949848897	0.0789398982015642
zgc:171731	0.237565309375201	0.212325930822219	0.154259953909573	0.399687176387095	0.47458118192753	0.0354377203975241	0	0.162264552398794	0.0816546498240342	0.137927404114921	0.0716455288277169	0.123579671389795	0.076328829764876	0.315179542817675	0.0309501702259362	0.00774449902414793	0.185117692348703	0.115705948918995
si:ch211-212k18.13	0.00225372344883011	0.00595607414459652	0.016499315229363	0.0276939072771888	0.0211202162710146	0	0	0	0	0.00281358675965597	0.00921365637662228	0.00480470687131299	0.00494213989715407	0	0	0	0	0
zgc:194655	0.0472868084935886	0.0522849843275745	0.0905207205585906	0.172223612645313	0.157363383561678	0.0139063684214186	0.0674036128336479	0.0414593698175788	0	0.0646061720697593	0.0848436185658891	0.132334208892544	0.126655577499695	0.309725882043303	0.00603509407202885	0.0382781780258978	0.284298792476101	0.0021316843759899
si:ch211-212k18.15	0.0142216739448359	0.0429312707346046	0.0646452316870745	0.0547637998750274	0.160835816300508	0.00732077819872253	0.188058298072402	0.0219900077404827	0	0.0135065346979251	0.0596614464309275	0.0894755110011141	0.0254879482391796	0.113659922171676	0.0359485935112789	0.0294804915053135	0.0969454069186672	0
si:ch211-212k18.4	0.392212179865133	0.949639802932531	0.487149953014249	0.74447182644212	0.47534655702892	0.644966321685082	0.494394914468803	1.12015731165862	0.450359070371493	0.390954232441691	0.645340393964379	0.404852110183633	0.507620575794415	0.462956676423822	0.416685914956561	0.255534268981595	0.860422183355926	0.305190310056794
si:ch211-196p9.1	0.00868056244648068	0.0132718672943301	0.0156093410256905	0.0201741104600151	0	0.0213971734582359	0	0	0	0.0235069938713714	0.0419968872782174	0.03396875742909	0.0171854469722476	0.0896810238513506	0	0.0178551493971294	0.157387002594377	0
tkfc	0.431916760340485	0.0922874452715758	0.108973891208051	0.13396544891293	0.137326042934861	0.0924003768007885	0.29218407596786	0.521386075088753	0.060084960133629	0.592944248163998	0.127768775322142	0.12319268529193	0.18552879065276	0.170662414810212	0.244826101918975	0.119408349532129	0.176074955654896	0.183888311429232
si:dkey-9k7.3	0.0207680399758488	0.0172655976606662	0.148583412225592	0.214669071633644	0.0193427339020097	0	0	0.693956357072802	0	0.0118425206924424	0.0222409963450442	0.119852225480843	0.214108865304006	0	0.05175983436853	0.0126780598598664	0.304834938	0.0436957899106421
BX957278.1	0.00142403871334685	0	0.00677528092064765	0.00414558636002593	0	0	0	0	0	0.00161626505712527	0	0	0	0	0	0	0	0
ovol1a	0.0553588568074937	0.0461493551576594	0.00196574029189671	0	0.0249025686999614	0	0	0	0	0.0376406132034271	0.0510739923506201	0.00154981636089073	0.00419408550062702	0	0.00606943432872056	0.0284757331903071	0.0193617214893811	0.0348122748080973
mus81	0.00728096119473833	0.097125137247569	0.0926223956274745	0.0183547340537932	0	0.0139063684214186	0.0674036128336479	0.0439800154809655	0	0.0391343205954086	0.0574336800676149	0.0788467324016045	0.0268754024846547	0	0.0344619626087706	0.0128448869717075	0	0.0347945901371255
TMEM151A	0	0	0	0	0	0	0	0	0	0.00165160322823647	0.00317076604439326	0.000584849291940508	0	0	0	0	0	0
si:ch211-285j22.3	0	0	0	0	0	0	0	0	0	0	0.00275253095221056	0.0004221730165499	0	0	0	0	0	0
zgc:110591	0.0540294244024038	0.173468577934255	0.517944562151387	0.239089391519442	0.320360137186884	0.384341946770138	0.188058298072402	0.617735815776247	0.303934179200034	0.0397932939262482	0.143316552156115	0.441880427555076	0.277091468417328	0.573547333154582	0.2503781687395	0.114662074703001	0.328636950187576	0.329198553550187
prox3	0.000904213402776864	0.0158193285709522	0	0.0031637740280728	0	0	0	0	0	0	0.0254130704397631	0.0018766844552624	0	0	0.0122757752919333	0.0072133479106675	0	0
snx15	0.0291999556872612	0.0461564640773664	0.191476344397617	0.0101397091842251	0.0467566405025628	0.21291140656842	0	0.115901715345387	0	0.0554637606147126	0.0782674701965213	0.263687943131353	0.0149022935496732	0	0.100152283943378	0.0517711825210756	0	0.0215183672757724
trip6	0.00449472594040818	0.0426196040178333	0.00980478991102392	0.00896903549492132	0	0.0344631425210078	0	0	0	0.00976183582411051	0.0347797632992125	0.00681061698973986	0.00378314985056558	0	0.0402454975349633	0.0247776929799261	0	0
bcl6b	0	0	0	0.0020412116550736	0	0	0	0	0	0	0	0	0.00503515799066985	0	0	0	0	0
slc16a13	0.227320739213839	0.0990549302939268	0.0907742741413724	0.185901911036665	0.078323250093824	0.265257532713529	0.188058298072402	0	0.0816546498240342	0.0731848366921479	0.0826778344096412	0.0405499806994354	0.112251177584675	0.155112154791945	0.660075081984133	0.041469766942984	0.0675877246748595	0.0764875079848984
acap1	0.0225902724798788	0.0285468719824415	0.234063480880736	1.11576680890236	0.112251948327093	0.226115427919748	0	1.63941759686637	0.452511406944155	0.0174817128212123	0.0546360391711555	0.165775571225724	0.775567798236888	0.16791173334121	0.194822680371427	0.0715534077780758	0.895428107753642	0.302138116454286
zgc:114045	0.00352971741937868	0.00575974154865818	0.0241512986092144	0.051766442277963	0.23235021323922	0	0	0	0	0.00455591474259638	0.000221422973855792	0.0174836343271307	0.0263191232107549	0.135381335926564	0	0.0192884147142277	0.0466305600165975	0.0417641162712997
si:ch73-335l21.1	0.238812703039605	0.148175290029717	0.0348978271068973	0.0146314428400427	0.0318894471521673	0.0402999742857904	0.188058298072402	0.0219900077404827	0	0.16105381601203	0.15842832257028	0.0331620839639939	0.0228036535565575	0.0818943302288553	0.0147557916482219	0.0506912573225532	0	0
CU019646.1	0.0356182856365101	0	0.0081089103047813	0	0	0	0	0	0	0.0111522615427723	0.00288640440026578	0.00150627952872731	0	0	0	0	0	0
si:ch73-335l21.4	5.52787115757146	2.05943106952059	1.94599415958845	1.38605697776704	1.3082200499585	0.384574528196853	6.51172092456905	0.162315905863714	0.193802935026472	5.44794099789748	2.8846238494025	4.26433082286114	1.80720140363729	1.12227700089389	0.560082332239611	24.185206708585	0.734360400331564	0.653897369168393
si:ch73-335l21.2	0.00592407010737477	0.00152380255785497	0	0	0	0	0	0	0	0.000179032437096953	0.00634854340006002	0.00384512426153364	0	0	0	0.0101039786638267	0	0
dvl2	0.00736550910300089	0.0867778073623126	0.0187789144344533	0	0.0256364242315482	0	0.310655483069276	0	0	0.0251541440873131	0.123116034910093	0.0582132488702719	0.00622893893549805	0.0310505005340686	0	0.26974845123525	0.00470295656067143	0
acadvl	0.515331565051954	0.507318164519691	0.442689753627162	0.272067936839624	0.192738971987001	0.224094331342455	0.134807225667296	0.498439836489739	0.384117683697971	0.882556816047427	0.836667916127731	0.520474429231861	0.420412037325609	0.40586931486995	0.656085993837999	0.557582807651349	0.88359137610045	0.147688149368267
zgc:194312	0.00144931691191484	0.00660933442175752	0.150590539788574	0.0350929164324294	0.297365285139539	0.23069966526731	0	0.0744180508424123	0	0.00592294513774959	0.00392647795598405	0.128661280811777	0.15112574868067	0.280099120449033	0.319722574033248	0.0102397751006192	0.023757369250761	0.109383791083635
ponzr1	1.51975757781398	0.426008518822784	3.08709451370769	1.11272148225872	4.76561775945042	2.39513633783616	2.58474189670596	1.55632020152837	1.61122579352929	1.27766558469925	0.540027550648244	3.76845401048047	1.24872171437041	3.94160432943625	1.42203884983725	0.789196445690941	2.73659875820858	1.61240918253184
si:dkey-33c9.6	0.0141111007719807	0.0141239728404144	0.274693947227319	0.265328804154104	0.333147564354398	0.686962264577365	0	0.668468026679887	0	0.021115935925715	0.00973577870531336	0.24054405011921	0.264382696007321	0.238846063129608	0.333511219603735	0.0254356987093886	0.380577371377609	0.274747373967635
ntn5	0	0	0	0	0	0	0	0	0	0.00145537358857869	0.000597158172031954	0.00259938525446033	0	0	0	0.0425465984826308	0	0
cnpy4	0.00156608334664327	0.0032776461256584	0.0173085862048317	0	0	0	0	0	0	0.00483805763350496	0.00754750052632387	0.00471105578985531	0	0	0	0.0414162140383719	0	0
si:dkey-19b23.13	0.00227890850101307	0	0	0	0	0	0	0	0	0.00012438445862958	0	0.00141004090116841	0	0	0	0	0	0
si:dkey-19b23.12	0	0	0	0	0	0	0	0	0	0	0	0	0	0	0	0.00506214799088408	0	0
si:dkey-19b23.14	0.000542346378083436	0.00374376195663975	0.00151815447069924	0.00893568806585245	1.95915805739558	0	0	0	0	0	0	0.00749750730715152	0	1.39611331927901	0	0.0208008328905154	0	0.0119764208226843
zgc:103586	0.0148239641172521	0	0.00430326604201436	0.00434991215352406	0.0136492683992138	0	0	0	0	0.00562179425978833	0.0141133503202747	0.0044037638565009	0	0.021084591380619	0	0.00258012314411742	0	0
slc3a2a	1.42372156022332	1.80780241172022	1.71775960178541	0.134368839235409	0.134928510009165	1.41373972951608	0.833789345551799	0	0.118824116542693	1.05954438015596	1.68361541250418	3.27626854425509	0.220915621681394	0.217742922248531	2.28206677920757	0.50695854779071	0.154349358096822	0.084345349176881
zgc:158423	0.0390852408034588	0.0384367663420653	0.0324151965271326	0.0028151132168158	0	0.0197250145649711	0	0	0	0.00745691749874139	0.0211376379861126	0.0357217349399843	0.0100435585814673	0	0.00607275156373353	0.00417324189072806	0	0
CR318653.1	0	0.00576779784436434	0	0	0	0	0	0	0	0	0.000593844074908963	0.00155815835270735	0	0	0	0	0	0
si:dkey-19b23.10	0	0.00168968867486166	0.0304023820887151	0.19334841474495	0.0227842333105491	0	0	0.0627321088025695	0	0.000263270962687133	0.000416593242107745	0.0259373261080863	0.211711462704189	0	0	0	0.0444823280765412	0
si:dkey-19b23.11	0	0	0	0	0	0.00958781963393705	0	0	0	0	0	0.00340326324561377	0	0	0	0	0	0
si:dkey-19b23.7	0	0.00197390497621445	0	0	0	0	0	0	0	0.000422934556798419	0.00259406268077887	0.00620691621777651	0.00868739686861953	0	0	0.00329023130326062	0	0
si:dkey-19b23.8	0.00952849368835908	0.0211480247921905	0.214129772107347	0.022522260012317	0	0.0630681569282036	0.134807225667296	0	0	0.01540267630059	0.0251399446020392	0.400743467457275	0.0406381233839547	0.1007398092044	0.0321825717043343	0.263898938940757	0	0
SAT2	0.0010399300896125	0.0131337868699122	0.00716884300361624	0.0173997593565872	0.0466229299181244	0	0	0	0	0.000612427579510113	0.0133212479613593	0.00634587187981684	0.00803781613251796	0	0	0.00542714920535681	0.0607135051097887	0
sat2a	0	0	0	0	0	0	0	0	0	0	0	0.00083706637032285	0	0	0	0	0	0
tnfsf12	0.00118575039162526	0	0.0232631310121315	0	0	0	0	0	0	0.00206286918759327	0	0.030633627330267	0	0	0	0.0169854493187028	0	0
chd3	0.0150203510882775	0.0748445317849738	0.0623223761963617	0.169987320298762	0.0123077418701597	0	0.0674036128336479	0.240712682815637	0.060084960133629	0.0176642026691567	0.0531850776659345	0.0398768919819018	0.140220423475658	0	0	0.0869728241058722	0.0869440100530303	0.0602732132551712
cyb5d1	0.00473524243529617	0.122008865877485	0.020235046782966	0.00936939496137463	0	0.0172126758424859	0	0	0	0.00749136319269708	0.0665703194627943	0.0130469407626482	0.0040887754935152	0	0.00715729955087945	0	0	0.0294151387953324
dnajc3b	0.0494631454792928	0.780521373260238	0.180637720702898	0.105147407235244	0.0768857132644323	0.362458852975239	0	0.564648945306049	0.300252564063404	0.0825828966952356	0.711460636627818	0.232960208602078	0.136143235547335	0.150515567073849	0.507176982852027	0.229015397905444	0.499738706903447	0.330455398378191
cldn15a	0.963907155955965	1.1131768658824	0.0597833455765853	0.0707683948406037	0.0432498785521884	0.103270821213235	0.606632515502831	0.108772587075543	0	0.546853242809379	0.777940720343411	0.0465134627601827	0.032857909169409	0.247529331913123	0.125706999301759	2.48190513745451	0.0296418989964192	0.101266298464412
fis1	0.236235661202804	0.42514951344226	0.784280425488821	0.409457018315759	1.40823490119194	0.902113362096162	0.700924619642622	0.387072460085161	1.59076181381494	0.34080694135311	0.640705197998109	1.46092247781277	0.454922643638337	0.645295408320939	0.775840288501804	1.07634806111793	0.387886627458644	1.5055613528167
gigyf1a	0.0403478903646187	0.0630846953317852	0.0446231544783913	0.0880499186501581	0.0701236186008021	0.160144251543892	0	0	0.0630859103927729	0.0248770857832396	0.0694780605064539	0.0289866604831935	0.074307069724534	0.0307253644028218	0.0710101035076849	0.0356824883659549	0.014042833450591	0
wrap53	0.0073960730824547	0.0137493297209586	0.0147252792192048	0	0	0.00931779745903663	0.188058298072402	0	0	0.00713091544134622	0.0210208688144864	0.0138143655692241	0.0156889375935555	0.0135832838675412	0.0140815213704184	0.0131978854591166	0	0
efnb3b	0	0.0129154838921563	0	0	0	0	0	0	0	0	0.00424916545856395	0	0	0	0	0.0156859827539815	0	0
serpinh2	0	0	0.00149476540628546	0	0	0	0	0	0	0	0.00227116296823047	0	0	0	0	0.167114902246176	0	0
dnah2	0.00138888560957564	0.0641941313277948	0.000654229844552372	0	0	0	0	0	0	0.00086635113003376	0.0357339085813111	0.000746855579304318	0	0	0	0.00324401900216571	0	0
kdm6ba	2.06788366491953	2.02598149837112	7.96042261894095	8.71136031406548	6.10868488298028	1.51514165960003	1.80442045957956	6.37884638918728	9.88248049262676	1.17451081007759	1.46732099403057	4.91187299052703	4.79582308067753	2.97401034333334	0.842046476718945	2.46978347251743	4.724736006919	11.3199146858891
BX005336.1	0.00891131537296807	0.0488188170555301	0.00162199003254685	0	0	0	0	0	0	0.00283943587323996	0.00250317262229375	0	0	0	0	0	0	0.0021316843759899
tmem88b	0.00127277108483512	0.00101911866617749	0	0	0	0	1.30679323124528	0	0	0	0	0	0	0	0	0.0230986716559797	0.0225569676217287	0
RF00003.148	0.0268483197018689	0.0592457500176914	0.00227665151844716	0	0	0.010769015388923	0	0	0	0.209880184769781	0.165248772645707	0.0173893935548508	0	0.020746070175657	0.0505816894284269	0.00733552835540368	0.0491373930647483	0.0613450757150416
RF00003.149	0.00179270069642837	0	0	0	0	0	0	0	0	0	0	0	0	0	0	0	0	0
RF00004	0.0143656339118335	0.0259956731011982	0.00357774774878844	0.00526639534197865	0	0.00820031735228153	0	0	0	0.0534925395802072	0.0220420155427959	0.00869412425284568	0	0.0217521344281908	0.00718971870225578	0.0435138286947592	0	0
tm4sf5	1.65162533508815	1.8175722303997	0.112099366608372	0.147732481272656	0.107217039694197	2.60667579941996	0.366501740883269	0.083903879715398	0.0853322410806475	1.24477549383087	1.78629682569813	0.0745730342053049	0.105138008983156	0.269030340445402	1.77428157877658	0.108356089312472	0.154632439965971	0.150369894409015
si:dkey-85k7.7	0.0293377714749139	0.00212070684486006	0.00940487396595897	0.01576797115092	0	0	0.310655483069276	0	0	0.0197655159152385	0.0101051524592082	0.000824288144758187	0	0	0	0.760099182934582	0	0.0853497204796654
mettl3	0.00922237550157457	0.00665746447084012	0.0109195148392917	0.00650982735821107	0	0.0295522510694335	0	0	0	0.00700903053285961	0.0100862482374694	0.0127193327230201	0.00355680755181379	0	0.0206878717351952	0.00362754145554375	0.082259815922059	0
pop7	0.033043369495344	0.0632084121065866	0.0820152762188593	0.0462604542030451	0.160518526617076	0.138878715360945	0	0.0219900077404827	0	0.0336310314263548	0.0946014841024506	0.0908874984614729	0.125861202075672	0.0724038408331036	0.116031148795601	0.0744127785360613	0.207973994948494	0.146215174276987
epoa	0	0	0	0	0	0	0	0	0	0	0.00462586450057664	0.000373427789652159	0	0	0	0	0	0
ufsp1	0.00761900675829046	0.0146383255525237	0.0071407591490104	0.0162781530916182	0	0.0167826783944881	0	0	0	0.00925866838403939	0.0152137526362369	0.00733022430658942	0	0	0.0668508390334298	0.00631162411058714	0.01055597251647	0
si:dkey-85k7.10	0.00177853345688212	0.0153765105408338	0	0	0	0	0	0	0	0.00335922456314882	0.0683105141315812	0	0.00377869684082051	0	0	0	0	0
si:dkey-85k7.11	0	0.029106923366109	0.000875931564167637	0.00417533047740729	0	0	0	0	0	0	0.032217674820735	0.00535505916537119	0	0	0	0	0	0
si:dkey-85k7.12	0.0432448783380366	0.0913517366281954	0.22360492440855	0.046407316712982	0.237596744191707	0.0286000334176271	0	0.125464217605139	0.0874974844473221	0.0175205932193405	0.0432621783310357	0.0587331160028416	0.0792176223190138	0.18291913613432	0	0.0109528005552078	0.059198116589225	0.039579977281093
nlgn2a	0	0	0.000632662571821437	0.00526193103397471	0	0	0	0	0	0.00378834721016017	0.00547278275679391	0.000592484382963443	0	0.0176431254443862	0	0	0	0
tmem256	0.207785117388991	0.232100484773421	0.280073227619404	0.235656815258972	0.182444581441705	0.296711981180147	0.322865523739698	0.418725659454462	0.0661222600588488	0.336883656480405	0.31466553331134	0.509235478852839	0.298522464332305	0.496121099634296	0.482884954903227	0.323285721021006	0.720294956700438	0.355535216520422
tmem102	0.0268215167978215	0.0243158063105578	0.00409503047849581	0.00530540567784516	0	0.0101595558242194	0	0	0	0.0382653052061613	0.0440691419660936	0.00572418238582308	0.0085773374347913	0	0	0.0276197858685318	0	0
fgf11a	0.00395630498522122	0	0	0	0	0	0	0	0	0.000369443859902159	0.000546491747045584	0	0	0	0	0	0	0
chrnb1	0.000670798472216232	0.00372526887128078	0	0	0	0	0	0	0	0.000365121275095819	0.0104472098451259	0	0.00343449642554785	0	0	0.00198349415503942	0	0
chrnb1l	0	0	0	0	0	0	0	0	0	0.000283692128224303	0.00582089247199836	0	0	0	0	0	0	0.0021316843759899
cldn7a	0	0	0	0	0	0	0	0	0	0	0	0.00046865187601346	0	0	0	0.0293179472746036	0	0
si:dkey-112a7.4	0.531027687413327	1.27940706408089	3.34113796044982	8.71619876866999	6.21207208639738	1.30607823298842	2.00014928250848	3.60263528377415	9.12646600686217	0.395200133952764	1.2603793556257	2.81189714494604	7.0073257921008	5.58769255833832	1.55323234147848	2.08630947131908	3.84936284014931	8.00195371548201
BX649313.1	0	0	0.00123278766452938	0.00151299755681155	0	0	0	0	0	0	0	0.00406334313123913	0	0	0	0	0	0
si:dkey-112a7.5	7.54091767915741e-05	0	0	0	0	0	0	0	0	0	0.00757186985370599	0	0	0	0	0	0	0
ponzr5	0.000829746890689477	0.0032273160026464	0.026899874727159	0	0	0	0	0	0	0.000782234102813756	0	0	0	0	0	0.0129058902483093	0	0
BX470211.1	0.0209458287998636	0.0258634605172822	0.0263427381019788	0.0492927875086891	0	0.0111474642305742	0	0	0.0624235311743115	0.0133752246214096	0.0230078204484571	0.0237908736804381	0.0236093257710298	0.102138457565164	0	0.0508524767990057	0	0
ponzr3	0.000212800489985896	0	0	0	0	0	0	0	0	0.00170123114695643	0	0	0	0	0	0	0	0
ponzr4	0.00870888410888589	0.00296222569790037	0.00267621253837689	0	0	0	0	0	0	0.00428385000794837	0.00453687160925558	0	0	0	0	0	0	0
ugt5g1	0.0917686137058483	0.0186356123814227	0.00205030421388774	0.00819352198262514	0.0136492683992138	0	0	0	0	0.117790256968633	0.0181691460988313	0.00230425588287204	0.00708972004128984	0.0217521344281908	0	0.165787945027715	0	0
si:dkey-165a24.9	0.0330525403140819	0	0.00300884540371785	0	0	0	0	0	0	0.02825002757907	0.0129823354147324	0.000832716637270382	0	0	0	0.105483870527455	0	0
fxr2	0.118851204109064	0.279196783213142	0.204733254250006	0.477084298620083	0.137061804518587	0.427883720355829	0	0.909735832260292	0.19922025352367	0.0877354965618732	0.237427120852285	0.192452670145146	0.344393230255255	0.191572075870417	0.108636196512328	0.176789482330127	0.501212875237537	0.0558561548174754
ponzr6	0.00132025610856096	0.0118872983088492	0.0576909369929926	0.114209953911935	4.28095315390463	0.0266308038508142	0	0	0.0962667744854541	0.00381663311318922	0.0102029596497333	0.265862382568431	0.0232467214470585	2.76756190777622	0	0.0673576087032038	0.0152307148688331	0
si:dkey-165a24.10	0.000703399634343143	0	0.00479157436770693	0	0	0	0.366501740883269	0	0	4.79704922373094e-05	0.00130889092959528	0.00149171998411232	0	0	0.0124546572634004	0.00292568068886907	0	0
si:ch211-15b10.6	0.336707385559593	0.779489990746458	0.484260904332784	0.122984649893231	0.804575450681563	0.0197569161722584	3.5985659471214	0.10264390236775	0.352237202803446	0.325225286793498	0.940082693442968	0.708482252959786	0.147730164885725	1.50379425802443	0.252653385321495	1.62678421582152	0.175210937612811	0.963441404495698
rbm4.3	0.645834696972795	1.31070185177112	1.47204209685999	1.93242461349894	1.43798996544103	0.769824220283971	1.95813112885801	2.9847076773166	1.52689207329716	0.63423338790182	1.21316900295615	1.43776124105227	1.72150444843993	1.47074234544306	0.856116344636319	1.42413518671102	2.3140872333034	1.73997516117389
rbm4.2	0.242578262097593	0.525607996975168	0.853106932908855	1.86409209587163	1.28473007018934	0.523827143763018	0	1.53247818088004	1.3254092436313	0.193266108132705	0.62395332101529	0.940338486681407	1.72655891913854	1.27318817504679	0.540073898799802	0.795960923716301	1.02073899992302	2.11895449029178
rbm4.1	0.0244156962013455	0.0998609435325236	0.040770698627846	0.0223555745117093	0.0571345393196366	0.132440798220741	0	0	0	0.0156984591113841	0.0882870240119614	0.0336444648480849	0.0168830189338215	0.0963213067065938	0.0455840455840456	0.0664450261989993	0.0118938230097425	0.0341611724114372
sf1	0.419249794619375	0.898372072931563	0.841950288134838	1.15712772407263	0.530890563059254	0.995219367535733	0.981551340590827	1.25386145116663	0.424623176489454	0.372942138117236	0.786430098357261	0.640012686614025	0.854586999442586	0.775425989549771	0.443005902699058	0.572825362837813	0.782461054832957	0.399166391109707
pygmb	0.000891570177227211	0.0190663211660919	0.0163873566977005	0.123176377462103	0.0272985367984276	0.0458880842799766	0	0.0899127456209955	0	0.00636455353038659	0.0462933399360463	0.0342963802996328	0.165773065539444	0.0823010022968823	0.0774010267872458	0.108696564393954	0.620782225672098	0.215995504689851
clcn5b	0.0282633285460877	0.0614420334835462	0.63220999280253	0.107805035827478	0.167477807326775	0.245433210487035	0.895023635004996	0.176518840868037	0	0.0259117020371481	0.0356304521175596	0.21150497571265	0.0291730858624099	0.143279102687742	0.0557932463903107	0.174840217835645	0.125322977647045	0.22632935225206
tnfsf10l	0.160056475856833	0.0412987757171248	0.0614017936514838	0.0228709292684238	0.0317919534565801	0	0.188058298072402	0	0	0.15787619198216	0.0431333095139044	0.00683755162595518	0	0.0262086100525745	0	0.229237725278788	0	0
RF00001.91	0	0	0	0	0	0	0	0	0	9.14808897153232e-05	0	0	0	0	0	0	0	0
si:dkey-171c9.3	0.0183042619809401	0.0577219497003971	0.329604659143294	1.163876578196	0.631049721560603	0.0373390701497401	0	0.761199911231559	0.678731755993899	0.00635813759618954	0.0164488724043798	0.245092849262418	1.2505533506874	0.643240265786351	0.0578598208759789	0.077888953463106	0.791197605415286	0.591175386146556
ccnb3	0.00898809414538702	0.00977580136338818	0.0569624637949747	0	0	0	0	0	0	0.00479550701838738	0.0144282083884314	0.0369248504489825	0.00884372692340006	0.0254370724982003	0	0	0.00450254528885179	0
BX957325.1	0	0	0	0	0.015999872001024	0	0	0	0	0.00132127532932941	0.000671305116499632	0	0	0	0	0	0	0
htr2cl1	0.000892011193748248	0.00180456229439268	0.00301359567056294	0.0158880607928906	0	0	0	0	0	0.00246392497577786	0.00853177323156657	0.0207815872594313	0.00988210646981511	0	0	0.00287232514720666	0	0
zgc:109889	0.00183633817036176	0.0029943974823106	0	0.00317781125072295	0	0.0671524023771951	0	0	0	0.00225484238250146	0.00983453600426333	0.00264520497916043	0.00265625415039711	0	0.0133096888918563	0.0163393622200394	0.0118168110680979	0
[truncated: 22,001 more rows]
